# Supplementary material for: A Model-Based Approach for Identifying Signatures of Ancient Balancing Selection in Genetic Data
Source: PubMed Central journal article supplement (PMC4140648; doi:10.1371/journal.pgen.1004561), 2014-08-21

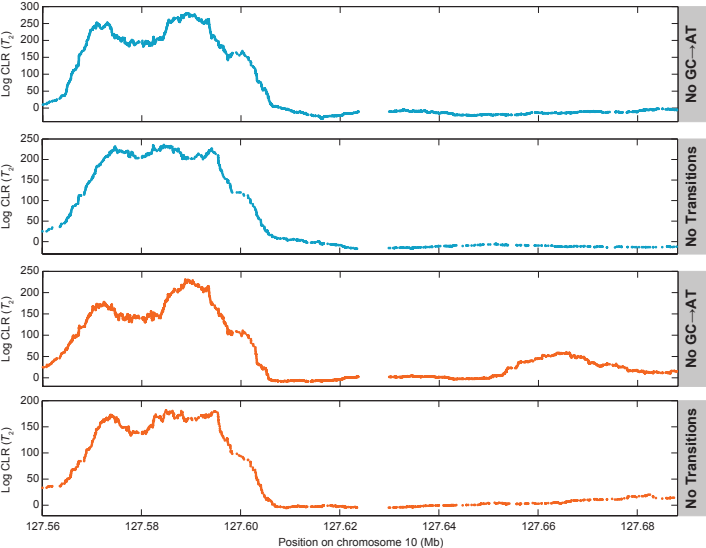

*FANK1*

CpG island

rs10794037

rs10794040

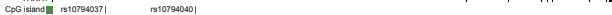

Supplement: pgen.1004561.s024.pdf [file pgen.1004561.s024.pdf]
