# Supplementary material for: A Model-Based Approach for Identifying Signatures of Ancient Balancing Selection in Genetic Data
Source: PubMed Central journal article supplement (PMC4140648; doi:10.1371/journal.pgen.1004561), 2014-08-21

$s = 0.01, h = 100$

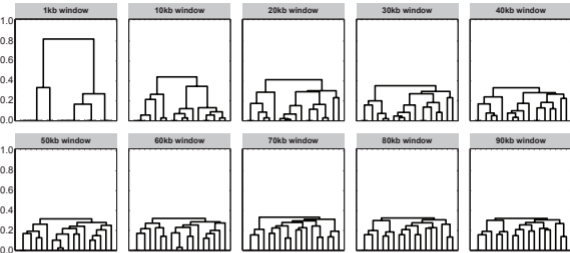

**Neutrality**

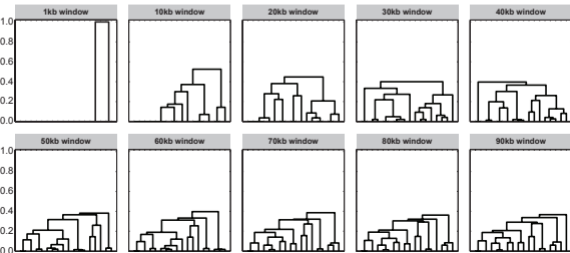

Supplement: pgen.1004561.s026.pdf [file pgen.1004561.s026.pdf]
