# Supplementary material for: A Model-Based Approach for Identifying Signatures of Ancient Balancing Selection in Genetic Data
Source: PubMed Central journal article supplement (PMC4140648; doi:10.1371/journal.pgen.1004561), 2014-08-21
Supplement: pgen.1004561.s027.pdf [file pgen.1004561.s027.pdf]

Table S1: Top 100 signals in the CEU population using the  $T_1$  test statistic.

| Rank | Gene name                        | Chromosome | $T_1$ | Rank | Gene name                     | Chromosome | $T_1$ |
|------|----------------------------------|------------|-------|------|-------------------------------|------------|-------|
| 1    | <b>HLA-A</b> <sup>74,75</sup>    | 6          | 375.3 | 51   | ZNF568                        | 19         | 137.9 |
| 2    | <b>HLA-B</b> <sup>15,74,75</sup> | 6          | 366.3 | 52   | MYRIP                         | 3          | 136.8 |
| 3    | FANK1                            | 10         | 357.9 | 53   | IGSF5                         | 21         | 136.2 |
| 4    | <b>HLA-C</b> <sup>75</sup>       | 6          | 320.9 | 54   | KIAA1267                      | 17         | 135.0 |
| 5    | TEKT4                            | 2          | 307.8 | 55   | CCDC169-SOHLH2                | 13         | 134.9 |
| 6    | <b>HLA-DPB1</b> <sup>14,75</sup> | 6          | 262.0 | 56   | CCDC169                       | 13         | 134.9 |
| 7    | OR4C3                            | 11         | 246.8 | 57   | KIAA1324L                     | 7          | 134.5 |
| 8    | <b>HLA-DPA1</b> <sup>76</sup>    | 6          | 244.4 | 58   | RNF150                        | 4          | 133.9 |
| 9    | <b>HLA-DQA1</b> <sup>14,75</sup> | 6          | 240.9 | 59   | OR51F1                        | 11         | 130.1 |
| 10   | RNF144B                          | 6          | 237.8 | 60   | DLG2                          | 11         | 130.0 |
| 11   | CPE                              | 4          | 216.3 | 61   | KDM4C                         | 9          | 129.7 |
| 12   | AXDND1                           | 1          | 206.9 | 62   | HLA-DRA                       | 6          | 129.0 |
| 13   | ARPC5                            | 1          | 205.5 | 63   | <b>FHIT</b> <sup>77</sup>     | 3          | 128.3 |
| 14   | <b>HLA-DQB1</b> <sup>14</sup>    | 6          | 204.0 | 64   | ANO3                          | 11         | 128.1 |
| 15   | DMBT1                            | 10         | 199.2 | 65   | CDSN <sup>15</sup>            | 6          | 127.5 |
| 16   | ARHGAP42                         | 11         | 198.9 | 66   | <b>PSORS1C1</b> <sup>78</sup> | 6          | 127.5 |
| 17   | ZNF717                           | 3          | 196.6 | 67   | SH3RF3                        | 2          | 127.3 |
| 18   | CTNNA3                           | 10         | 195.8 | 68   | CCDC146                       | 7          | 127.1 |
| 19   | RGS6                             | 14         | 193.9 | 69   | LITD1                         | 1          | 126.0 |
| 20   | <b>HLA-DRB1</b> <sup>14,75</sup> | 6          | 189.4 | 70   | FMO5                          | 1          | 125.9 |
| 21   | CPNE4                            | 3          | 184.1 | 71   | CEP112                        | 17         | 125.0 |
| 22   | RGL1                             | 1          | 181.3 | 72   | TRPC6                         | 11         | 124.8 |
| 23   | STK32A                           | 5          | 179.7 | 73   | C4orf37                       | 4          | 124.7 |
| 24   | POLN                             | 4          | 175.3 | 74   | <b>PRIM2</b> <sup>79</sup>    | 6          | 124.2 |
| 25   | KALRN                            | 3          | 172.3 | 75   | ADH1C                         | 4          | 124.0 |
| 26   | SNX31                            | 8          | 171.7 | 76   | <b>MYO3A</b> <sup>80</sup>    | 10         | 123.4 |
| 27   | MAP2K3                           | 17         | 169.0 | 77   | IGFBP7                        | 4          | 123.0 |
| 28   | <b>SLC2A9</b> <sup>15</sup>      | 4          | 166.7 | 78   | <b>HLA-DRB5</b>               | 6          | 122.7 |
| 29   | KCNJ12                           | 17         | 159.8 | 79   | CSMD1                         | 8          | 122.0 |
| 30   | KCNJ18                           | 17         | 159.8 | 80   | EMID2                         | 7          | 121.9 |
| 31   | <b>ERAP1</b> <sup>81</sup>       | 5          | 159.2 | 81   | LRP1B                         | 2          | 121.7 |
| 32   | APBB1IP                          | 10         | 156.1 | 82   | CHRN3                         | 8          | 121.6 |
| 33   | BNC2                             | 9          | 154.5 | 83   | KRT83                         | 12         | 121.4 |
| 34   | FRAS1                            | 4          | 151.1 | 84   | PTPRB                         | 12         | 121.3 |
| 35   | WWTR1                            | 3          | 150.9 | 85   | LGALS8                        | 1          | 120.9 |
| 36   | ART3                             | 4          | 150.3 | 86   | GCOM1                         | 15         | 120.9 |
| 37   | SLC38A9                          | 5          | 150.3 | 87   | <b>SNX19</b>                  | 11         | 120.1 |
| 38   | FXN                              | 9          | 150.0 | 88   | SCP2                          | 1          | 119.8 |
| 39   | FOPNL                            | 16         | 148.8 | 89   | ANK3                          | 10         | 119.4 |
| 40   | <b>MAGI2</b> <sup>82</sup>       | 7          | 146.8 | 90   | OR51B6                        | 11         | 119.4 |
| 41   | POLR1E                           | 9          | 146.0 | 91   | OR5W2                         | 11         | 119.0 |
| 42   | BCAS1                            | 20         | 145.6 | 92   | RIMBP2                        | 12         | 118.9 |
| 43   | USP20                            | 9          | 145.3 | 93   | ADH4                          | 4          | 118.6 |
| 44   | GRIN2A                           | 16         | 145.2 | 94   | ITGA1                         | 5          | 118.5 |
| 45   | OR4C45                           | 11         | 145.0 | 95   | EMR1                          | 19         | 118.2 |
| 46   | SPEF2                            | 5          | 143.6 | 96   | PACRG                         | 6          | 118.1 |
| 47   | MSH3                             | 5          | 143.3 | 97   | <b>KANK1</b>                  | 9          | 117.9 |
| 48   | LUZP2                            | 11         | 141.1 | 98   | APOBEC4                       | 1          | 117.8 |
| 49   | COL4A3                           | 2          | 139.3 | 99   | ZDHHC7                        | 16         | 117.5 |
| 50   | MLF1IP                           | 4          | 138.1 | 100  | ANK2                          | 4          | 117.4 |

Previously-hypothesized genes are indicated in bold. Genes overlapping with Table S2 are highlighted in gray.

- 74 P. W. Hedrick, T. S. Whittam, and P. Parham, "Heterozygosity at individual amino acid sites: extremely high levels for *HLA-A* and *-B* genes," *Proc. Natl. Acad. Sci. USA*, vol. 88, pp. 58975901, 1991.
- 75 A. Sánchez-Mazas, "An apportionment of human HLA diversity," *Tissue Antigens*, vol. 69, pp. 198202, 2005.
- 76 P. G. Bronson, S. J. Mack, H. A. Erlich, and M. Slatkin, "A sequence-based approach demonstrates that balancing selection in classical human leukocyte antigen (HLA) loci is asymmetric," *Hum. Mol. Genet.*, vol. 22, pp. 252261, 2013.
- 77 Y. Ding, G. Larson, G. Rivas, C. Lundberg, L. Geller, C. Ouyang, J. Weitzel, J. Archambeau, J. Slater, M. B. Daly, A. B. Benson, J. M. Kirkwood, P. J. ODwyer, R. Sutphen, J. A. Stewart, D. Johnson, M. Nordborg, and T. G. Krontiris, "Strong signature of natural selection within an *FHIT* intron implicated in prostate cancer risk," *PLoS ONE*, vol. 3, p. e3533, 2008.
- 78 R. Cagliani, S. Riva, U. Pozzoli, M. Fumagalli, G. P. Comi, N. Bresolin, M. Clerici, and M. Sironi, "Balancing selection is common in the extended MHC region but most alleles with opposite risk profile for autoimmune diseases are neutrally evolving," *BMC Evol. Biol.*, vol. 1, p. 171, 2011.
- 79 A. Hodgkinson and A. Eyre-Walker, "The genomic distribution and local context of coincident SNPs in human and chimpanzee," *Genome Biol. Evol.*, vol. 2, pp. 547557, 2010.
- 80 S. Asthana, S. Schmidt, and S. Sunyaev, "A limited role for balancing selection," *Trends Genet.*, vol. 21, pp. 3032, 2005.
- 81 R. Cagliani, S. Riva, M. Biasin, M. Fumagalli, U. Pozzoli, S. Lo Caputo, F. Mazzotta, L. Piacentini, N. Bresolin, M. Clerici, and M. Sironi, "Genetic diversity at endoplasmic reticulum aminopeptidases is maintained by balancing selection and is associated with natural resistance to HIV-1 infection," *Hum. Mol. Genet.*, vol. 10, pp. 47054714, 2010.
- 82 L. Excoffier, T. Hofer, and M. Foll, "Detecting loci under selection in a hierarchically structured population," *Heredity*, vol. 103, pp. 2852981, 2009.
