# Supplementary material for: A Model-Based Approach for Identifying Signatures of Ancient Balancing Selection in Genetic Data
Source: PubMed Central journal article supplement (PMC4140648; doi:10.1371/journal.pgen.1004561), 2014-08-21
Supplement: pgen.1004561.s028.pdf [file pgen.1004561.s028.pdf]

Table S2: Top 100 signals in the YRI population using the  $T_1$  test statistic.

| Rank | Gene name                        | Chromosome | $T_1$ | Rank | Gene name                   | Chromosome | $T_1$ |
|------|----------------------------------|------------|-------|------|-----------------------------|------------|-------|
| 1    | <b>HLA-A</b> <sup>74,75</sup>    | 6          | 307.4 | 51   | WWTR1                       | 3          | 119.9 |
| 2    | FANK1                            | 10         | 302.2 | 52   | WDR75                       | 2          | 119.4 |
| 3    | <b>HLA-B</b> <sup>15,74,75</sup> | 6          | 272.3 | 53   | C1orf130                    | 1          | 118.2 |
| 4    | TEKT4                            | 2          | 271.7 | 54   | FOPNL                       | 16         | 118.1 |
| 5    | <b>HLA-DPA1</b> <sup>76</sup>    | 6          | 267.1 | 55   | SGCG                        | 13         | 117.6 |
| 6    | <b>HLA-C</b> <sup>75</sup>       | 6          | 262.7 | 56   | ZNF568                      | 19         | 117.0 |
| 7    | MLL3                             | 7          | 240.3 | 57   | FRAS1                       | 4          | 116.1 |
| 8    | HLA-DRB5                         | 6          | 227.2 | 58   | SLC39A12                    | 10         | 116.0 |
| 9    | OR4C3                            | 11         | 209.3 | 59   | KANK1                       | 9          | 115.5 |
| 10   | <b>HLA-DQA1</b> <sup>14,75</sup> | 6          | 205.4 | 60   | EMID2                       | 7          | 114.7 |
| 11   | FRG2C                            | 3          | 189.5 | 61   | MYRIP                       | 3          | 114.7 |
| 12   | <b>HLA-DQB1</b> <sup>14,75</sup> | 6          | 186.7 | 62   | <b>PRIM2</b> <sup>79</sup>  | 6          | 114.4 |
| 13   | <b>HLA-DPB1</b> <sup>14</sup>    | 6          | 180.2 | 63   | ASB18                       | 2          | 114.3 |
| 14   | SNTG2                            | 2          | 170.8 | 64   | HLA-DRA                     | 6          | 114.2 |
| 15   | ZNF717                           | 3          | 170.3 | 65   | ARHGAP24                    | 4          | 113.8 |
| 16   | POLR1E                           | 9          | 167.8 | 66   | KCNAB1                      | 3          | 113.8 |
| 17   | DMBT1                            | 10         | 166.4 | 67   | <b>TRIM40</b> <sup>78</sup> | 6          | 111.9 |
| 18   | CPE                              | 4          | 166.0 | 68   | LUZP2                       | 11         | 111.8 |
| 19   | RNF144B                          | 6          | 163.2 | 69   | ABCD4                       | 14         | 111.7 |
| 20   | CTNNA3                           | 10         | 160.1 | 70   | <b>LGALS8</b> <sup>15</sup> | 1          | 111.1 |
| 21   | <b>HLA-DRB1</b> <sup>14,75</sup> | 6          | 157.2 | 71   | BNC2                        | 9          | 109.4 |
| 22   | OR4C45                           | 11         | 156.4 | 72   | PTPRB                       | 12         | 109.3 |
| 23   | AXDND1                           | 1          | 151.8 | 73   | RBFOX1                      | 16         | 109.1 |
| 24   | <b>SLC2A9</b> <sup>15</sup>      | 4          | 150.8 | 74   | KL                          | 13         | 106.6 |
| 25   | ZNF85                            | 19         | 150.4 | 75   | HEATR1                      | 1          | 106.3 |
| 26   | MAP2K3                           | 17         | 150.3 | 76   | POLN                        | 4          | 105.5 |
| 27   | KCNJ12                           | 17         | 150.1 | 77   | PDE11A                      | 2          | 105.1 |
| 28   | SORD                             | 15         | 148.5 | 78   | VWDE                        | 7          | 103.9 |
| 29   | ARHGAP42                         | 11         | 146.6 | 79   | SPATA13                     | 13         | 103.7 |
| 30   | KCNJ18                           | 17         | 146.3 | 80   | SPATA16                     | 3          | 103.6 |
| 31   | ARPC5                            | 1          | 143.7 | 81   | APBB1IP                     | 10         | 103.0 |
| 32   | MCM9                             | 6          | 141.1 | 82   | MPHOSPH6                    | 16         | 102.0 |
| 33   | C18orf1                          | 18         | 139.5 | 83   | CES5A                       | 16         | 101.9 |
| 34   | SLC38A9                          | 5          | 132.0 | 84   | PARP4                       | 13         | 100.9 |
| 35   | GRIN2A                           | 16         | 131.9 | 85   | KRT83                       | 12         | 100.9 |
| 36   | MYOM2                            | 8          | 131.7 | 86   | MOSC2                       | 1          | 100.9 |
| 37   | GBA3                             | 4          | 127.8 | 87   | PACRG                       | 6          | 99.1  |
| 38   | STK32A                           | 5          | 125.2 | 88   | <b>RCBTB1</b> <sup>15</sup> | 13         | 97.8  |
| 39   | CSMD1                            | 8          | 125.2 | 89   | FAM55A                      | 11         | 96.5  |
| 40   | <b>FHIT</b> <sup>77</sup>        | 3          | 125.0 | 90   | GALC                        | 14         | 96.0  |
| 41   | ART3                             | 4          | 124.5 | 91   | LRPPRC                      | 2          | 95.6  |
| 42   | RGS6                             | 14         | 123.7 | 92   | SLC24A4                     | 14         | 95.3  |
| 43   | CEP112                           | 17         | 123.7 | 93   | ADCY5                       | 3          | 95.0  |
| 44   | IGSF5                            | 21         | 123.6 | 94   | ULK4                        | 3          | 94.9  |
| 45   | GRHL1                            | 2          | 122.8 | 95   | FYB                         | 5          | 94.3  |
| 46   | RGL1                             | 1          | 121.9 | 96   | KIAA0748                    | 12         | 93.8  |
| 47   | SNX19                            | 11         | 121.8 | 97   | COL4A3                      | 2          | 93.7  |
| 48   | SPEF2                            | 5          | 121.2 | 98   | CCDC169                     | 13         | 93.6  |
| 49   | FXN                              | 9          | 121.0 | 99   | CCDC169-SOHLH2              | 13         | 93.6  |
| 50   | PTCHD3                           | 10         | 120.3 | 100  | PLEKHG1                     | 6          | 93.3  |

Previously-hypothesized genes are indicated in bold. Genes overlapping with Table S1 are highlighted in gray.

- 74 P. W. Hedrick, T. S. Whittam, and P. Parham, "Heterozygosity at individual amino acid sites: extremely high levels for *HLA-A* and *-B* genes," *Proc. Natl. Acad. Sci. USA*, vol. 88, pp. 58975901, 1991.
- 75 A. Sánchez-Mazas, "An apportionment of human HLA diversity," *Tissue Antigens*, vol. 69, pp. 198202, 2005.
- 76 P. G. Bronson, S. J. Mack, H. A. Erlich, and M. Slatkin, "A sequence-based approach demonstrates that balancing selection in classical human leukocyte antigen (HLA) loci is asymmetric," *Hum. Mol. Genet.*, vol. 22, pp. 252261, 2013.
- 77 Y. Ding, G. Larson, G. Rivas, C. Lundberg, L. Geller, C. Ouyang, J. Weitzel, J. Archambeau, J. Slater, M. B. Daly, A. B. Benson, J. M. Kirkwood, P. J. ODwyer, R. Sutphen, J. A. Stewart, D. Johnson, M. Nordborg, and T. G. Krontiris, "Strong signature of natural selection within an *FHIT* intron implicated in prostate cancer risk," *PLoS ONE*, vol. 3, p. e3533, 2008.
- 78 R. Cagliani, S. Riva, U. Pozzoli, M. Fumagalli, G. P. Comi, N. Bresolin, M. Clerici, and M. Sironi, "Balancing selection is common in the extended MHC region but most alleles with opposite risk profile for autoimmune diseases are neutrally evolving," *BMC Evol. Biol.*, vol. 1, p. 171, 2011.
- 79 A. Hodgkinson and A. Eyre-Walker, "The genomic distribution and local context of coincident SNPs in human and chimpanzee," *Genome Biol. Evol.*, vol. 2, pp. 547557, 2010.
