# Supplementary material for: A Model-Based Approach for Identifying Signatures of Ancient Balancing Selection in Genetic Data
Source: PubMed Central journal article supplement (PMC4140648; doi:10.1371/journal.pgen.1004561), 2014-08-21
Supplement: pgen.1004561.s029.pdf [file pgen.1004561.s029.pdf]

Table S3: Top 100 signals in the CEU population using the  $T_2$  test statistic.

| Rank | Gene name                        | Chromosome | $T_2$ | Rank | Gene name                        | Chromosome | $T_2$ |
|------|----------------------------------|------------|-------|------|----------------------------------|------------|-------|
| 1    | <b>HLA-DPB1</b> <sup>14</sup>    | 6          | 405.3 | 51   | <b>WFDC8</b> <sup>83</sup>       | 20         | 204.2 |
| 2    | <b>HLA-DPA1</b> <sup>76</sup>    | 6          | 363.5 | 52   | <b>USP20</b>                     | 9          | 203.7 |
| 3    | <b>SLC2A9</b> <sup>15</sup>      | 4          | 350.0 | 53   | <b>CCDC146</b>                   | 7          | 201.5 |
| 4    | FANK1                            | 10         | 330.0 | 54   | <b>HLA-DRB1</b> <sup>14,75</sup> | 6          | 197.9 |
| 5    | CPE                              | 4          | 317.9 | 55   | POLR1E                           | 9          | 197.1 |
| 6    | <b>HLA-C</b> <sup>75</sup>       | 6          | 317.7 | 56   | ADH4                             | 4          | 196.5 |
| 7    | DMBT1                            | 10         | 312.2 | 57   | OR5W2                            | 11         | 195.8 |
| 8    | <b>HLA-A</b> <sup>74,75</sup>    | 6          | 309.6 | 58   | ASB18                            | 2          | 195.0 |
| 9    | ARPC5                            | 1          | 297.8 | 59   | BICC1                            | 10         | 194.3 |
| 10   | CCDC169                          | 13         | 286.0 | 60   | SH3RF3                           | 2          | 192.6 |
| 11   | CCDC169-SOHLH2                   | 13         | 286.0 | 61   | BMPR1B                           | 4          | 192.1 |
| 12   | <b>LGALS8</b> <sup>15</sup>      | 1          | 277.0 | 62   | NUP88                            | 17         | 190.9 |
| 13   | APBB1IP                          | 10         | 274.0 | 63   | ADAMTS12                         | 5          | 190.1 |
| 14   | RGL1                             | 1          | 268.4 | 64   | ADH1C                            | 4          | 188.7 |
| 15   | TEKT4                            | 2          | 261.8 | 65   | APOBEC4                          | 1          | 187.8 |
| 16   | STK32A                           | 5          | 259.2 | 66   | SNX31                            | 8          | 187.5 |
| 17   | CEP112                           | 17         | 257.7 | 67   | SGCZ                             | 8          | 187.1 |
| 18   | CPNE4                            | 3          | 253.0 | 68   | PANK1                            | 10         | 187.0 |
| 19   | RNF144B                          | 6          | 252.0 | 69   | ANK3                             | 10         | 186.9 |
| 20   | C4orf37                          | 4          | 245.2 | 70   | PKD1L1                           | 7          | 186.8 |
| 21   | MLF1IP                           | 4          | 244.1 | 71   | ZNF717                           | 3          | 186.5 |
| 22   | <b>HLA-B</b> <sup>15,74,75</sup> | 6          | 237.0 | 72   | KLHL14                           | 18         | 184.2 |
| 23   | RGS6                             | 14         | 236.1 | 73   | FXN                              | 9          | 184.0 |
| 24   | ARHGAP42                         | 11         | 234.8 | 74   | MAPT                             | 17         | 182.6 |
| 25   | POLN                             | 4          | 233.4 | 75   | TYW1                             | 7          | 182.0 |
| 26   | SLC15A2                          | 3          | 232.8 | 76   | BCAS1                            | 20         | 180.4 |
| 27   | KALRN                            | 3          | 227.2 | 77   | NTN4                             | 12         | 179.8 |
| 28   | FOPNL                            | 16         | 227.1 | 78   | THSD7B                           | 2          | 177.7 |
| 29   | KIAA1267                         | 17         | 226.7 | 79   | COL5A2                           | 2          | 177.6 |
| 30   | ZNF568                           | 19         | 226.4 | 80   | LRP1B                            | 2          | 175.6 |
| 31   | HEATR1                           | 1          | 225.7 | 81   | SNX19                            | 11         | 175.4 |
| 32   | KIAA1324L                        | 7          | 223.4 | 82   | OR4C3                            | 11         | 174.7 |
| 33   | MSH3                             | 5          | 222.5 | 83   | KRT83                            | 12         | 173.5 |
| 34   | FRAS1                            | 4          | 221.2 | 84   | LRRC16A                          | 6          | 171.5 |
| 35   | EMR1                             | 19         | 221.1 | 85   | C18orf1                          | 18         | 170.3 |
| 36   | GRIN2A                           | 16         | 220.1 | 86   | HLA-DRA                          | 6          | 169.8 |
| 37   | BNC2                             | 9          | 220.1 | 87   | PTPN14                           | 1          | 169.5 |
| 38   | <b>HLA-DQA1</b> <sup>14,75</sup> | 6          | 220.1 | 88   | CNBD1                            | 8          | 167.1 |
| 39   | KDM4C                            | 9          | 217.8 | 89   | GPC5                             | 13         | 166.6 |
| 40   | AXDND1                           | 1          | 217.1 | 90   | MAP2K3                           | 17         | 164.6 |
| 41   | MYRIP                            | 3          | 215.8 | 91   | CSMD1                            | 8          | 164.5 |
| 42   | SPEF2                            | 5          | 214.2 | 92   | CADM2                            | 3          | 162.8 |
| 43   | PLCB4                            | 20         | 212.3 | 93   | MYO1B                            | 2          | 162.6 |
| 44   | SLC38A9                          | 5          | 210.2 | 94   | MYLK4                            | 6          | 162.0 |
| 45   | ART3                             | 4          | 209.3 | 95   | <b>OR5I1</b> <sup>55</sup>       | 11         | 162.0 |
| 46   | CTNNA3                           | 10         | 208.3 | 96   | <b>FHIT</b> <sup>77</sup>        | 3          | 161.9 |
| 47   | <b>ERAP1</b> <sup>81</sup>       | 5          | 207.6 | 97   | CUBN                             | 10         | 161.8 |
| 48   | <b>HLA-DQB1</b> <sup>14,75</sup> | 6          | 206.8 | 98   | ULK4                             | 3          | 161.8 |
| 49   | EMID2                            | 7          | 206.1 | 99   | ASTN2                            | 9          | 161.6 |
| 50   | ADCY5                            | 3          | 205.4 | 100  | PGLYRP4                          | 1          | 161.3 |

Previously-hypothesized genes are indicated in bold. Genes overlapping with Table S4 are highlighted in gray.

- 74 P. W. Hedrick, T. S. Whittam, and P. Parham, "Heterozygosity at individual amino acid sites: extremely high levels for *HLA-A* and *-B* genes," *Proc. Natl. Acad. Sci. USA*, vol. 88, pp. 58975901, 1991.
- 75 A. Sánchez-Mazas, "An apportionment of human HLA diversity," *Tissue Antigens*, vol. 69, pp. 198202, 2005.
- 76 P. G. Bronson, S. J. Mack, H. A. Erlich, and M. Slatkin, "A sequence-based approach demonstrates that balancing selection in classical human leukocyte antigen (HLA) loci is asymmetric," *Hum. Mol. Genet.*, vol. 22, pp. 252261, 2013.
- 77 Y. Ding, G. Larson, G. Rivas, C. Lundberg, L. Geller, C. Ouyang, J. Weitzel, J. Archambeau, J. Slater, M. B. Daly, A. B. Benson, J. M. Kirkwood, P. J. ODwyer, R. Sutphen, J. A. Stewart, D. Johnson, M. Nordborg, and T. G. Krontiris, "Strong signature of natural selection within an *FHIT* intron implicated in prostate cancer risk," *PLoS ONE*, vol. 3, p. e3533, 2008.
- 81 R. Cagliani, S. Riva, M. Biasin, M. Fumagalli, U. Pozzoli, S. Lo Caputo, F. Mazzotta, L. Piacentini, N. Bresolin, M. Clerici, and M. Sironi, "Genetic diversity at endoplasmic reticulum aminopeptidases is maintained by balancing selection and is associated with natural resistance to HIV-1 infection," *Hum. Mol. Genet.*, vol. 10, pp. 47054714, 2010.
- 83 Z. Ferreira, B. Hurle, J. Rocha, and S. Seixas, "Differing evolutionary histories of *WFDC8* (short-term balancing) in Europeans and *SPINT4* (incomplete selective sweep) in Africans," *Mol. Biol. Evol.*, vol. 28, pp. 28112822, 2011.
