# Supplementary material for: A Model-Based Approach for Identifying Signatures of Ancient Balancing Selection in Genetic Data
Source: PubMed Central journal article supplement (PMC4140648; doi:10.1371/journal.pgen.1004561), 2014-08-21
Supplement: pgen.1004561.s030.pdf [file pgen.1004561.s030.pdf]

Table S4: Top 100 signals in the YRI population using the  $T_2$  test statistic.

| Rank | Gene name                               | Chromosome | $T_2$ | Rank | Gene name                               | Chromosome | $T_2$ |
|------|-----------------------------------------|------------|-------|------|-----------------------------------------|------------|-------|
| 1    | <i>CPE</i>                              | 4          | 311.9 | 51   | <i>HPSE2</i>                            | 10         | 185.0 |
| 2    | <b><i>HLA-DPA1</i></b> <sup>76</sup>    | 6          | 298.7 | 52   | <i>IGSF5</i>                            | 21         | 184.3 |
| 3    | <b><i>HLA-DPB1</i></b> <sup>14</sup>    | 6          | 290.9 | 53   | <i>CASQ2</i>                            | 1          | 183.6 |
| 4    | <i>FANK1</i>                            | 10         | 283.6 | 54   | <i>MYRIP</i>                            | 3          | 183.1 |
| 5    | <i>TEKT4</i>                            | 2          | 277.2 | 55   | <i>FRG2C</i>                            | 3          | 182.8 |
| 6    | <i>KIAA1324L</i>                        | 7          | 273.7 | 56   | <i>APOBEC4</i>                          | 1          | 181.1 |
| 7    | <i>MYOM2</i>                            | 8          | 271.1 | 57   | <i>NTN4</i>                             | 12         | 178.9 |
| 8    | <i>ZNF568</i>                           | 19         | 266.8 | 58   | <i>ALG8</i>                             | 11         | 178.4 |
| 9    | <i>C1orf130</i>                         | 1          | 265.2 | 59   | <i>ESYT2</i>                            | 7          | 177.1 |
| 10   | <i>ARPC5</i>                            | 1          | 256.7 | 60   | <i>ATP8A2</i>                           | 13         | 175.5 |
| 11   | <i>MSH3</i>                             | 5          | 256.6 | 61   | <i>RFX8</i>                             | 2          | 175.4 |
| 12   | <i>SH3RF3</i>                           | 2          | 256.6 | 62   | <i>ULK4</i>                             | 3          | 174.6 |
| 13   | <i>DMBT1</i>                            | 10         | 253.8 | 63   | <i>AXDND1</i>                           | 1          | 174.3 |
| 14   | <i>BNC2</i>                             | 9          | 253.2 | 64   | <i>EMID2</i>                            | 7          | 170.6 |
| 15   | <i>PKD1L1</i>                           | 7          | 247.7 | 65   | <i>SMYD3</i>                            | 1          | 169.5 |
| 16   | <i>USP20</i>                            | 9          | 240.8 | 66   | <b><i>HLA-B</i></b> <sup>15,74,75</sup> | 6          | 167.9 |
| 17   | <i>C4orf37</i>                          | 4          | 239.5 | 67   | <i>VRK3</i>                             | 19         | 167.5 |
| 18   | <i>APBB1IP</i>                          | 10         | 236.4 | 68   | <i>ARHGAP42</i>                         | 11         | 167.4 |
| 19   | <i>STK32B</i>                           | 4          | 233.7 | 69   | <i>RBFOX1</i>                           | 16         | 167.1 |
| 20   | <i>SLC15A2</i>                          | 3          | 233.1 | 70   | <i>C15orf48</i>                         | 15         | 166.8 |
| 21   | <i>PACRG</i>                            | 6          | 231.9 | 71   | <i>GBA3</i>                             | 4          | 166.8 |
| 22   | <b><i>WFDC8</i></b> <sup>83</sup>       | 20         | 231.4 | 72   | <i>KLHL14</i>                           | 18         | 163.7 |
| 23   | <i>RGL1</i>                             | 1          | 230.9 | 73   | <i>BICC1</i>                            | 10         | 163.7 |
| 24   | <i>MLF1IP</i>                           | 4          | 228.9 | 74   | <i>SNX31</i>                            | 8          | 163.5 |
| 25   | <i>POLN</i>                             | 4          | 223.2 | 75   | <i>WWTR1</i>                            | 3          | 163.5 |
| 26   | <b><i>SLC2A9</i></b> <sup>15</sup>      | 4          | 221.1 | 76   | <i>KIAA0748</i>                         | 12         | 163.5 |
| 27   | <i>SPEF2</i>                            | 5          | 220.0 | 77   | <i>ASTN2</i>                            | 9          | 162.5 |
| 28   | <i>FRMD4B</i>                           | 3          | 215.6 | 78   | <i>ANK3</i>                             | 10         | 162.4 |
| 29   | <i>MLL3</i>                             | 7          | 215.0 | 79   | <i>PGBD5</i>                            | 1          | 162.3 |
| 30   | <i>PGLYRP4</i>                          | 1          | 211.2 | 80   | <i>SLC38A9</i>                          | 5          | 161.0 |
| 31   | <b><i>LGALS8</i></b> <sup>15</sup>      | 1          | 209.4 | 81   | <i>SLCO1B3</i>                          | 12         | 160.3 |
| 32   | <i>ART3</i>                             | 4          | 205.9 | 82   | <i>DGKI</i>                             | 7          | 159.8 |
| 33   | <i>RCAN1</i>                            | 21         | 204.0 | 83   | <i>RAMP3</i>                            | 7          | 157.5 |
| 34   | <i>ARHGAP24</i>                         | 4          | 203.5 | 84   | <i>LAMA2</i>                            | 6          | 157.2 |
| 35   | <i>RNF144B</i>                          | 6          | 203.3 | 85   | <b><i>HLA-A</i></b> <sup>74,75</sup>    | 6          | 156.8 |
| 36   | <i>CEP112</i>                           | 17         | 201.9 | 86   | <i>ACBD5</i>                            | 10         | 155.8 |
| 37   | <i>HLA-DRB5</i>                         | 6          | 199.9 | 87   | <i>MYLK4</i>                            | 6          | 155.5 |
| 38   | <i>CCDC169</i>                          | 13         | 198.9 | 88   | <i>DHX37</i>                            | 12         | 154.6 |
| 39   | <i>CCDC169-SOHLH2</i>                   | 13         | 198.9 | 89   | <i>EMR1</i>                             | 19         | 154.2 |
| 40   | <i>C18orf1</i>                          | 18         | 198.9 | 90   | <i>RYR2</i>                             | 1          | 152.8 |
| 41   | <i>STK32A</i>                           | 5          | 196.7 | 91   | <i>BCKDHB</i>                           | 6          | 150.8 |
| 42   | <i>SPATA16</i>                          | 3          | 194.1 | 92   | <i>C16orf73</i>                         | 16         | 150.7 |
| 43   | <i>LRRC16A</i>                          | 6          | 192.5 | 93   | <i>FAHD1</i>                            | 16         | 150.7 |
| 44   | <b><i>HLA-C</i></b> <sup>75</sup>       | 6          | 192.2 | 94   | <b><i>RCBTB1</i></b> <sup>15</sup>      | 13         | 150.6 |
| 45   | <b><i>HLA-DQB1</i></b> <sup>14,75</sup> | 6          | 191.9 | 95   | <i>RGS6</i>                             | 14         | 148.8 |
| 46   | <i>SNX19</i>                            | 11         | 187.7 | 96   | <i>ACSBG2</i>                           | 19         | 148.5 |
| 47   | <i>CHRN3</i>                            | 8          | 187.5 | 97   | <i>SWAP70</i>                           | 11         | 148.0 |
| 48   | <i>CCDC146</i>                          | 7          | 186.5 | 98   | <i>ABCD4</i>                            | 14         | 147.7 |
| 49   | <i>WDR75</i>                            | 2          | 186.1 | 99   | <i>PTPRB</i>                            | 12         | 147.7 |
| 50   | <i>MYO5B</i>                            | 18         | 186.0 | 100  | <i>PTPN14</i>                           | 1          | 146.1 |

Previously-hypothesized genes are indicated in bold. Genes overlapping with Table S3 are highlighted in gray.

- 74 P. W. Hedrick, T. S. Whittam, and P. Parham, "Heterozygosity at individual amino acid sites: extremely high levels for *HLA-A* and *-B* genes," *Proc. Natl. Acad. Sci. USA*, vol. 88, pp. 58975901, 1991.
- 75 A. Sánchez-Mazas, "An apportionment of human HLA diversity," *Tissue Antigens*, vol. 69, pp. 198202, 2005.
- 76 P. G. Bronson, S. J. Mack, H. A. Erlich, and M. Slatkin, "A sequence-based approach demonstrates that balancing selection in classical human leukocyte antigen (HLA) loci is asymmetric," *Hum. Mol. Genet.*, vol. 22, pp. 252261, 2013.
- 83 Z. Ferreira, B. Hurle, J. Rocha, and S. Seixas, "Differing evolutionary histories of *WFDC8* (short-term balancing) in Europeans and *SPINT4* (incomplete selective sweep) in Africans," *Mol. Biol. Evol.*, vol. 28, pp. 28112822, 2011.
