# Supplementary material for: A Model-Based Approach for Identifying Signatures of Ancient Balancing Selection in Genetic Data
Source: PubMed Central journal article supplement (PMC4140648; doi:10.1371/journal.pgen.1004561), 2014-08-21
Supplement: pgen.1004561.s031.pdf [file pgen.1004561.s031.pdf]

Table S5: GO process analysis of top 100 signals, when compared to all signals, from CEU population using the  $T_1$  test statistic.

| Description                                                                                      | $p$ -value            | Enrichment | Genes                                                                                                          |
|--------------------------------------------------------------------------------------------------|-----------------------|------------|----------------------------------------------------------------------------------------------------------------|
| Interferon-gamma-mediated signaling pathway                                                      | $1.7 \times 10^{-12}$ | 28.6       | HLA-A, HLA-B, HLA-C, HLA-DPA1, HLA-DPB1, HLA-DQA1, HLA-DQB1, HLA-DRA, HLA-DRB1, HLA-DRB5                       |
| Cellular response to interferon-gamma                                                            | $1.5 \times 10^{-11}$ | 23.1       | HLA-A, HLA-B, HLA-C, HLA-DPA1, HLA-DPB1, HLA-DQA1, HLA-DQB1, HLA-DRA, HLA-DRB1, HLA-DRB5                       |
| Response to interferon-gamma                                                                     | $1.1 \times 10^{-10}$ | 19.0       | HLA-A, HLA-B, HLA-C, HLA-DPA1, HLA-DPB1, HLA-DQA1, HLA-DQB1, HLA-DRA, HLA-DRB1, HLA-DRB5                       |
| Antigen processing and presentation of peptide antigen                                           | $2.2 \times 10^{-9}$  | 11.8       | ERAP1, HLA-A, HLA-B, HLA-C, HLA-DPA1, HLA-DPB1, HLA-DQA1, HLA-DQB1, HLA-DRA, HLA-DRB1, HLA-DRB5                |
| Antigen processing and presentation                                                              | $8.8 \times 10^{-9}$  | 10.3       | ERAP1, HLA-A, HLA-B, HLA-C, HLA-DPA1, HLA-DPB1, HLA-DQA1, HLA-DQB1, HLA-DRA, HLA-DRB1, HLA-DRB5                |
| Antigen processing and presentation of exogenous peptide antigen                                 | $1.6 \times 10^{-8}$  | 11.5       | HLA-A, HLA-B, HLA-C, HLA-DPA1, HLA-DPB1, HLA-DQA1, HLA-DQB1, HLA-DRA, HLA-DRB1, HLA-DRB5                       |
| Antigen processing and presentation of exogenous antigen                                         | $1.8 \times 10^{-8}$  | 11.3       | HLA-A, HLA-B, HLA-C, HLA-DPA1, HLA-DPB1, HLA-DQA1, HLA-DQB1, HLA-DRA, HLA-DRB1, HLA-DRB5                       |
| T cell costimulation                                                                             | $4.4 \times 10^{-8}$  | 20.7       | HLA-DPA1, HLA-DPB1, HLA-DQA1, HLA-DQB1, HLA-DRA, HLA-DRB1, HLA-DRB5                                            |
| Lymphocyte costimulation                                                                         | $4.9 \times 10^{-8}$  | 20.4       | HLA-DPA1, HLA-DPB1, HLA-DQA1, HLA-DQB1, HLA-DRA, HLA-DRB1, HLA-DRB5                                            |
| T cell receptor signaling pathway                                                                | $2.0 \times 10^{-7}$  | 16.6       | HLA-DPA1, HLA-DPB1, HLA-DQA1, HLA-DQB1, HLA-DRA, HLA-DRB1, HLA-DRB5                                            |
| Antigen processing and presentation of exogenous peptide antigen via MHC class II                | $4.1 \times 10^{-7}$  | 15.0       | HLA-DPA1, HLA-DPB1, HLA-DQA1, HLA-DQB1, HLA-DRA, HLA-DRB1, HLA-DRB5                                            |
| Protein localization to membrane                                                                 | $4.6 \times 10^{-7}$  | 20.4       | ANK2, ANK3, CPE, DLG2, MAGI2, SCP2                                                                             |
| Antigen processing and presentation of peptide or polysaccharide antigen via MHC class II        | $4.8 \times 10^{-7}$  | 14.7       | HLA-DPA1, HLA-DPB1, HLA-DQA1, HLA-DQB1, HLA-DRA, HLA-DRB1, HLA-DRB5                                            |
| Antigen processing and presentation of peptide antigen via MHC class II                          | $4.8 \times 10^{-7}$  | 14.7       | HLA-DPA1, HLA-DPB1, HLA-DQA1, HLA-DQB1, HLA-DRA, HLA-DRB1, HLA-DRB5                                            |
| Detection of bacterium                                                                           | $6.1 \times 10^{-7}$  | 55.5       | HLA-A, HLA-B, HLA-DRB1, HLA-DRB5                                                                               |
| Immune response-activating signal transduction                                                   | $6.8 \times 10^{-7}$  | 9.0        | DMBT1, HLA-DPA1, HLA-DPB1, HLA-DQA1, HLA-DQB1, HLA-DRA, HLA-DRB1, HLA-DRB5, MAP2K3                             |
| Immune response-regulating signaling pathway                                                     | $1.2 \times 10^{-6}$  | 8.5        | DMBT1, HLA-DPA1, HLA-DPB1, HLA-DQA1, HLA-DQB1, HLA-DRA, HLA-DRB1, HLA-DRB5, MAP2K3                             |
| Antigen receptor-mediated signaling pathway                                                      | $1.2 \times 10^{-6}$  | 12.9       | HLA-DPA1, HLA-DPB1, HLA-DQA1, HLA-DQB1, HLA-DRA, HLA-DRB1, HLA-DRB5                                            |
| Immune response-activating cell surface receptor signaling pathway                               | $1.8 \times 10^{-6}$  | 12.1       | HLA-DPA1, HLA-DPB1, HLA-DQA1, HLA-DQB1, HLA-DRA, HLA-DRB1, HLA-DRB5                                            |
| Regulation of immune response                                                                    | $2.3 \times 10^{-6}$  | 4.9        | DMBT1, ERAP1, HLA-A, HLA-B, HLA-C, HLA-DPA1, HLA-DPB1, HLA-DQA1, HLA-DQB1, HLA-DRA, HLA-DRB1, HLA-DRB5, MAP2K3 |
| Immune response-regulating cell surface receptor signaling pathway                               | $3.2 \times 10^{-6}$  | 11.1       | HLA-DPA1, HLA-DPB1, HLA-DQA1, HLA-DQB1, HLA-DRA, HLA-DRB1, HLA-DRB5                                            |
| Immunoglobulin production involved in immunoglobulin mediated immune response                    | $3.3 \times 10^{-6}$  | 90.1       | HLA-DQB1, HLA-DRB1, HLA-DRB5                                                                                   |
| Humoral immune response mediated by circulating immunoglobulin                                   | $3.3 \times 10^{-6}$  | 90.1       | HLA-DQB1, HLA-DRB1, HLA-DRB5                                                                                   |
| Cytokine-mediated signaling pathway                                                              | $4.0 \times 10^{-6}$  | 6.3        | HLA-A, HLA-B, HLA-C, HLA-DPA1, HLA-DPB1, HLA-DQA1, HLA-DQB1, HLA-DRA, HLA-DRB1, HLA-DRB5                       |
| Activation of immune response                                                                    | $4.5 \times 10^{-6}$  | 7.2        | DMBT1, HLA-DPA1, HLA-DPB1, HLA-DQA1, HLA-DQB1, HLA-DRA, HLA-DRB1, HLA-DRB5, MAP2K3                             |
| Detection of biotic stimulus                                                                     | $7.2 \times 10^{-6}$  | 31.4       | HLA-A, HLA-B, HLA-DRB1, HLA-DRB5                                                                               |
| Immunoglobulin production                                                                        | $9.1 \times 10^{-6}$  | 67.6       | HLA-DQB1, HLA-DRB1, HLA-DRB5                                                                                   |
| Antigen processing and presentation of exogenous peptide antigen via MHC class I TAP-independent | $1.4 \times 10^{-5}$  | 60.1       | HLA-A, HLA-B, HLA-C                                                                                            |
| Positive regulation of T cell activation                                                         | $2.3 \times 10^{-5}$  | 8.2        | HLA-DPA1, HLA-DPB1, HLA-DQA1, HLA-DQB1, HLA-DRA, HLA-DRB1, HLA-DRB5                                            |

GO categories in which false discovery rate is less than 0.01.
