# Supplementary material for: A Model-Based Approach for Identifying Signatures of Ancient Balancing Selection in Genetic Data
Source: PubMed Central journal article supplement (PMC4140648; doi:10.1371/journal.pgen.1004561), 2014-08-21
Supplement: pgen.1004561.s032.pdf [file pgen.1004561.s032.pdf]

Table S6: GO process analysis of top 100 signals, when compared to all signals, from YRI population using the  $T_1$  test statistic.

| Description                                                                                      | $p$ -value            | Enrichment | Genes                                                                                                        |
|--------------------------------------------------------------------------------------------------|-----------------------|------------|--------------------------------------------------------------------------------------------------------------|
| Interferon-gamma-mediated signaling pathway                                                      | $3.2 \times 10^{-12}$ | 26.8       | HLA-A, HLA-B, HLA-C, HLA-DPA1, HLA-DPB1, HLA-DQA1, HLA-DQB1, HLA-DRA, HLA-DRB1, HLA-DRB5                     |
| Cellular response to interferon-gamma                                                            | $2.9 \times 10^{-11}$ | 21.7       | HLA-A, HLA-B, HLA-C, HLA-DPA1, HLA-DPB1, HLA-DQA1, HLA-DQB1, HLA-DRA, HLA-DRB1, HLA-DRB5                     |
| Response to interferon-gamma                                                                     | $2.2 \times 10^{-10}$ | 17.8       | HLA-A, HLA-B, HLA-C, HLA-DPA1, HLA-DPB1, HLA-DQA1, HLA-DQB1, HLA-DRA, HLA-DRB1, HLA-DRB5                     |
| T cell receptor signaling pathway                                                                | $1.5 \times 10^{-8}$  | 17.8       | FYB, HLA-DPA1, HLA-DPB1, HLA-DQA1, HLA-DQB1, HLA-DRA, HLA-DRB1, HLA-DRB5                                     |
| Antigen processing and presentation of exogenous peptide antigen                                 | $3.0 \times 10^{-8}$  | 10.8       | HLA-A, HLA-B, HLA-C, HLA-DPA1, HLA-DPB1, HLA-DQA1, HLA-DQB1, HLA-DRA, HLA-DRB1, HLA-DRB5                     |
| Antigen processing and presentation of exogenous antigen                                         | $3.4 \times 10^{-8}$  | 10.6       | HLA-A, HLA-B, HLA-C, HLA-DPA1, HLA-DPB1, HLA-DQA1, HLA-DQB1, HLA-DRA, HLA-DRB1, HLA-DRB5                     |
| Antigen processing and presentation of peptide antigen                                           | $5.7 \times 10^{-8}$  | 10.1       | HLA-A, HLA-B, HLA-C, HLA-DPA1, HLA-DPB1, HLA-DQA1, HLA-DQB1, HLA-DRA, HLA-DRB1, HLA-DRB5                     |
| T cell costimulation                                                                             | $6.8 \times 10^{-8}$  | 19.4       | HLA-DPA1, HLA-DPB1, HLA-DQA1, HLA-DQB1, HLA-DRA, HLA-DRB1, HLA-DRB5                                          |
| Lymphocyte costimulation                                                                         | $7.7 \times 10^{-8}$  | 19.1       | HLA-DPA1, HLA-DPB1, HLA-DQA1, HLA-DQB1, HLA-DRA, HLA-DRB1, HLA-DRB5                                          |
| Immune response-activating signal transduction                                                   | $1.1 \times 10^{-7}$  | 9.4        | DMBT1, FYB, HLA-DPA1, HLA-DPB1, HLA-DQA1, HLA-DQB1, HLA-DRA, HLA-DRB1, HLA-DRB5, MAP2K3                      |
| Antigen receptor-mediated signaling pathway                                                      | $1.1 \times 10^{-7}$  | 13.8       | FYB, HLA-DPA1, HLA-DPB1, HLA-DQA1, HLA-DQB1, HLA-DRA, HLA-DRB1, HLA-DRB5                                     |
| Immune response-activating cell surface receptor signaling pathway                               | $1.8 \times 10^{-7}$  | 13.0       | FYB, HLA-DPA1, HLA-DPB1, HLA-DQA1, HLA-DQB1, HLA-DRA, HLA-DRB1, HLA-DRB5                                     |
| Immune response-regulating signaling pathway                                                     | $2.0 \times 10^{-7}$  | 8.8        | DMBT1, FYB, HLA-DPA1, HLA-DPB1, HLA-DQA1, HLA-DQB1, HLA-DRA, HLA-DRB1, HLA-DRB5, MAP2K3                      |
| Antigen processing and presentation                                                              | $2.0 \times 10^{-7}$  | 8.8        | HLA-A, HLA-B, HLA-C, HLA-DPA1, HLA-DPB1, HLA-DQA1, HLA-DQB1, HLA-DRA, HLA-DRB1, HLA-DRB5                     |
| Immune response-regulating cell surface receptor signaling pathway                               | $3.7 \times 10^{-7}$  | 11.9       | FYB, HLA-DPA1, HLA-DPB1, HLA-DQA1, HLA-DQB1, HLA-DRA, HLA-DRB1, HLA-DRB5                                     |
| Antigen processing and presentation of exogenous peptide antigen via MHC class II                | $6.4 \times 10^{-7}$  | 14.1       | HLA-DPA1, HLA-DPB1, HLA-DQA1, HLA-DQB1, HLA-DRA, HLA-DRB1, HLA-DRB5                                          |
| Antigen processing and presentation of peptide or polysaccharide antigen via MHC class II        | $7.5 \times 10^{-7}$  | 13.8       | HLA-DPA1, HLA-DPB1, HLA-DQA1, HLA-DQB1, HLA-DRA, HLA-DRB1, HLA-DRB5                                          |
| Antigen processing and presentation of peptide antigen via MHC class II                          | $7.5 \times 10^{-7}$  | 13.8       | HLA-DPA1, HLA-DPB1, HLA-DQA1, HLA-DQB1, HLA-DRA, HLA-DRB1, HLA-DRB5                                          |
| Detection of bacterium                                                                           | $7.9 \times 10^{-7}$  | 52.0       | HLA-A, HLA-B, HLA-DRB1, HLA-DRB5                                                                             |
| Activation of immune response                                                                    | $8.9 \times 10^{-7}$  | 7.5        | DMBT1, FYB, HLA-DPA1, HLA-DPB1, HLA-DQA1, HLA-DQB1, HLA-DRA, HLA-DRB1, HLA-DRB5, MAP2K3                      |
| Positive regulation of T cell activation                                                         | $3.6 \times 10^{-6}$  | 8.8        | HLA-DPA1, HLA-DPB1, HLA-DQA1, HLA-DQB1, HLA-DRA, HLA-DRB1, HLA-DRB5, TESPA1                                  |
| Immunoglobulin production involved in immunoglobulin mediated immune response                    | $4.0 \times 10^{-6}$  | 84.5       | HLA-DQB1, HLA-DRB1, HLA-DRB5                                                                                 |
| Humoral immune response mediated by circulating immunoglobulin                                   | $4.0 \times 10^{-6}$  | 84.5       | HLA-DQB1, HLA-DRB1, HLA-DRB5                                                                                 |
| Regulation of immune response                                                                    | $4.8 \times 10^{-6}$  | 4.6        | DMBT1, FYB, HLA-A, HLA-B, HLA-C, HLA-DPA1, HLA-DPB1, HLA-DQA1, HLA-DQB1, HLA-DRA, HLA-DRB1, HLA-DRB5, MAP2K3 |
| Cytokine-mediated signaling pathway                                                              | $7.1 \times 10^{-6}$  | 5.9        | HLA-A, HLA-B, HLA-C, HLA-DPA1, HLA-DPB1, HLA-DQA1, HLA-DQB1, HLA-DRA, HLA-DRB1, HLA-DRB5                     |
| Detection of biotic stimulus                                                                     | $9.3 \times 10^{-6}$  | 29.4       | HLA-A, HLA-B, HLA-DRB1, HLA-DRB5                                                                             |
| Positive regulation of immune response                                                           | $9.6 \times 10^{-6}$  | 5.7        | DMBT1, FYB, HLA-DPA1, HLA-DPB1, HLA-DQA1, HLA-DQB1, HLA-DRA, HLA-DRB1, HLA-DRB5, MAP2K3                      |
| Immunoglobulin production                                                                        | $1.1 \times 10^{-5}$  | 63.4       | HLA-DQB1, HLA-DRB1, HLA-DRB5                                                                                 |
| Antigen processing and presentation of exogenous peptide antigen via MHC class I TAP-independent | $1.6 \times 10^{-5}$  | 56.3       | HLA-A, HLA-B, HLA-C                                                                                          |
| Positive regulation of lymphocyte activation                                                     | $1.9 \times 10^{-5}$  | 7.0        | HLA-DPA1, HLA-DPB1, HLA-DQA1, HLA-DQB1, HLA-DRA, HLA-DRB1, HLA-DRB5, TESPA1                                  |

GO categories in which false discovery rate is less than 0.01.
