# Supplementary material for: A Model-Based Approach for Identifying Signatures of Ancient Balancing Selection in Genetic Data
Source: PubMed Central journal article supplement (PMC4140648; doi:10.1371/journal.pgen.1004561), 2014-08-21
Supplement: pgen.1004561.s034.pdf [file pgen.1004561.s034.pdf]

Table S8: GO process analysis of top 100 signals, when compared to all signals, from YRI population using the  $T_2$  test statistic.

| Description                                 | $p$ -value           | Enrichment | Genes                                                                                                              |
|---------------------------------------------|----------------------|------------|--------------------------------------------------------------------------------------------------------------------|
| Interferon-gamma-mediated signaling pathway | $8.0 \times 10^{-8}$ | 19.0       | <i>HLA-A</i> , <i>HLA-B</i> , <i>HLA-C</i> , <i>HLA-DPA1</i> , <i>HLA-DPB1</i> , <i>HLA-DQB1</i> , <i>HLA-DRB5</i> |
| Cellular response to interferon-gamma       | $3.6 \times 10^{-7}$ | 15.3       | <i>HLA-A</i> , <i>HLA-B</i> , <i>HLA-C</i> , <i>HLA-DPA1</i> , <i>HLA-DPB1</i> , <i>HLA-DQB1</i> , <i>HLA-DRB5</i> |
| Detection of bacterium                      | $7.6 \times 10^{-7}$ | 52.6       | <i>HLA-A</i> , <i>HLA-B</i> , <i>HLA-DRB5</i> , <i>PGLYRP4</i>                                                     |
| Response to interferon-gamma                | $1.4 \times 10^{-6}$ | 12.6       | <i>HLA-A</i> , <i>HLA-B</i> , <i>HLA-C</i> , <i>HLA-DPA1</i> , <i>HLA-DPB1</i> , <i>HLA-DQB1</i> , <i>HLA-DRB5</i> |

GO categories in which false discovery rate is less than 0.01.
