# Supplementary material for: A Model-Based Approach for Identifying Signatures of Ancient Balancing Selection in Genetic Data
Source: PubMed Central journal article supplement (PMC4140648; doi:10.1371/journal.pgen.1004561), 2014-08-21
Supplement: pgen.1004561.s035.pdf [file pgen.1004561.s035.pdf]

Table S9: GO function analysis of top 100 signals, when compared to all signals, from CEU population using the  $T_1$  test statistic.

| Description                    | $p$ -value           | Enrichment | Genes                                                                                  |
|--------------------------------|----------------------|------------|----------------------------------------------------------------------------------------|
| MHC class II receptor activity | $1.2 \times 10^{-9}$ | 90.1       | <i>HLA-DPA1</i> , <i>HLA-DQA1</i> , <i>HLA-DQB1</i> , <i>HLA-DRA</i> , <i>HLA-DRB1</i> |

GO categories in which false discovery rate is less than 0.01.
