# Supplementary material for: A Model-Based Approach for Identifying Signatures of Ancient Balancing Selection in Genetic Data
Source: PubMed Central journal article supplement (PMC4140648; doi:10.1371/journal.pgen.1004561), 2014-08-21
Supplement: pgen.1004561.s036.pdf [file pgen.1004561.s036.pdf]

Table S10: GO function analysis of top 100 signals, when compared to all signals, from YRI population using the  $T_1$  test statistic.

| Description                    | $p$ -value           | Enrichment | Genes                                                  |
|--------------------------------|----------------------|------------|--------------------------------------------------------|
| MHC class II receptor activity | $1.6 \times 10^{-9}$ | 84.5       | <i>HLA-DPA1, HLA-DQA1, HLA-DQB1, HLA-DRA, HLA-DRB1</i> |

GO categories in which false discovery rate is less than 0.01.
