# Supplementary material for: A Model-Based Approach for Identifying Signatures of Ancient Balancing Selection in Genetic Data
Source: PubMed Central journal article supplement (PMC4140648; doi:10.1371/journal.pgen.1004561), 2014-08-21
Supplement: pgen.1004561.s038.pdf [file pgen.1004561.s038.pdf]

Table S12: GO component analysis of top 100 signals, when compared to all signals, from CEU population using the  $T_1$  test statistic.

| Description                                                | $p$ -value            | Enrichment | Genes                                                                                                                                                                                                                                                             |
|------------------------------------------------------------|-----------------------|------------|-------------------------------------------------------------------------------------------------------------------------------------------------------------------------------------------------------------------------------------------------------------------|
| Integral to luminal side of endoplasmic reticulum membrane | $5.0 \times 10^{-17}$ | 72.1       | HLA-A, HLA-B, HLA-C, HLA-DPA1, HLA-DPB1, HLA-DQA1, HLA-DQB1, HLA-DRA, HLA-DRB1, HLA-DRB5                                                                                                                                                                          |
| ER to Golgi transport vesicle membrane                     | $4.5 \times 10^{-16}$ | 60.1       | HLA-A, HLA-B, HLA-C, HLA-DPA1, HLA-DPB1, HLA-DQA1, HLA-DQB1, HLA-DRA, HLA-DRB1, HLA-DRB5                                                                                                                                                                          |
| MHC protein complex                                        | $1.9 \times 10^{-15}$ | 53.0       | HLA-A, HLA-B, HLA-C, HLA-DPA1, HLA-DPB1, HLA-DQA1, HLA-DQB1, HLA-DRA, HLA-DRB1, HLA-DRB5                                                                                                                                                                          |
| Transport vesicle membrane                                 | $8.0 \times 10^{-15}$ | 36.1       | CPE, HLA-A, HLA-B, HLA-C, HLA-DPA1, HLA-DPB1, HLA-DQA1, HLA-DQB1, HLA-DRA, HLA-DRB1, HLA-DRB5                                                                                                                                                                     |
| MHC class II protein complex                               | $4.2 \times 10^{-13}$ | 90.1       | HLA-DPA1, HLA-DPB1, HLA-DQA1, HLA-DQB1, HLA-DRA, HLA-DRB1, HLA-DRB5                                                                                                                                                                                               |
| Endocytic vesicle membrane                                 | $6.2 \times 10^{-13}$ | 24.8       | DMBT1, HLA-A, HLA-B, HLA-C, HLA-DPA1, HLA-DPB1, HLA-DQA1, HLA-DQB1, HLA-DRA, HLA-DRB1, HLA-DRB5                                                                                                                                                                   |
| Intrinsic to endoplasmic reticulum membrane                | $8.6 \times 10^{-12}$ | 19.6       | FMO5, HLA-A, HLA-B, HLA-C, HLA-DPA1, HLA-DPB1, HLA-DQA1, HLA-DQB1, HLA-DRA, HLA-DRB1, HLA-DRB5                                                                                                                                                                    |
| Clathrin-coated endocytic vesicle membrane                 | $2.0 \times 10^{-11}$ | 57.4       | HLA-DPA1, HLA-DPB1, HLA-DQA1, HLA-DQB1, HLA-DRA, HLA-DRB1, HLA-DRB5                                                                                                                                                                                               |
| Integral to endoplasmic reticulum membrane                 | $3.7 \times 10^{-11}$ | 21.2       | HLA-A, HLA-B, HLA-C, HLA-DPA1, HLA-DPB1, HLA-DQA1, HLA-DQB1, HLA-DRA, HLA-DRB1, HLA-DRB5                                                                                                                                                                          |
| Trans-Golgi network membrane                               | $1.0 \times 10^{-10}$ | 46.7       | HLA-DPA1, HLA-DPB1, HLA-DQA1, HLA-DQB1, HLA-DRA, HLA-DRB1, HLA-DRB5                                                                                                                                                                                               |
| Coated vesicle membrane                                    | $3.7 \times 10^{-10}$ | 16.9       | HLA-A, HLA-B, HLA-C, HLA-DPA1, HLA-DPB1, HLA-DQA1, HLA-DQB1, HLA-DRA, HLA-DRB1, HLA-DRB5                                                                                                                                                                          |
| Cytoplasmic vesicle membrane                               | $6.4 \times 10^{-9}$  | 8.1        | CPE, DMBT1, HLA-A, HLA-B, HLA-C, HLA-DPA1, HLA-DPB1, HLA-DQA1, HLA-DQB1, HLA-DRA, HLA-DRB1, HLA-DRB5, SNX19                                                                                                                                                       |
| Vesicle membrane                                           | $1.1 \times 10^{-8}$  | 7.8        | CPE, DMBT1, HLA-A, HLA-B, HLA-C, HLA-DPA1, HLA-DPB1, HLA-DQA1, HLA-DQB1, HLA-DRA, HLA-DRB1, HLA-DRB5, SNX19                                                                                                                                                       |
| Intrinsic to organelle membrane                            | $1.2 \times 10^{-8}$  | 10.1       | FMO5, HLA-A, HLA-B, HLA-C, HLA-DPA1, HLA-DPB1, HLA-DQA1, HLA-DQB1, HLA-DRA, HLA-DRB1, HLA-DRB5                                                                                                                                                                    |
| Integral to organelle membrane                             | $4.7 \times 10^{-8}$  | 10.2       | HLA-A, HLA-B, HLA-C, HLA-DPA1, HLA-DPB1, HLA-DQA1, HLA-DQB1, HLA-DRA, HLA-DRB1, HLA-DRB5                                                                                                                                                                          |
| Cytoplasmic vesicle part                                   | $1.4 \times 10^{-7}$  | 6.3        | CPE, DMBT1, HLA-A, HLA-B, HLA-C, HLA-DPA1, HLA-DPB1, HLA-DQA1, HLA-DQB1, HLA-DRA, HLA-DRB1, HLA-DRB5, SNX19                                                                                                                                                       |
| Clathrin-coated vesicle membrane                           | $4.4 \times 10^{-7}$  | 14.9       | HLA-DPA1, HLA-DPB1, HLA-DQA1, HLA-DQB1, HLA-DRA, HLA-DRB1, HLA-DRB5                                                                                                                                                                                               |
| Endosome membrane                                          | $3.7 \times 10^{-6}$  | 6.4        | HLA-A, HLA-B, HLA-C, HLA-DPA1, HLA-DPB1, HLA-DQA1, HLA-DQB1, HLA-DRA, HLA-DRB1, HLA-DRB5                                                                                                                                                                          |
| Endosomal part                                             | $5.7 \times 10^{-6}$  | 6.1        | HLA-A, HLA-B, HLA-C, HLA-DPA1, HLA-DPB1, HLA-DQA1, HLA-DQB1, HLA-DRA, HLA-DRB1, HLA-DRB5                                                                                                                                                                          |
| Lysosomal membrane                                         | $6.0 \times 10^{-6}$  | 10.1       | HLA-DPA1, HLA-DPB1, HLA-DQA1, HLA-DQB1, HLA-DRA, HLA-DRB1, HLA-DRB5                                                                                                                                                                                               |
| Vacuolar membrane                                          | $1.8 \times 10^{-5}$  | 8.5        | HLA-DPA1, HLA-DPB1, HLA-DQA1, HLA-DQB1, HLA-DRA, HLA-DRB1, HLA-DRB5                                                                                                                                                                                               |
| Phagocytic vesicle membrane                                | $1.9 \times 10^{-5}$  | 24.9       | DMBT1, HLA-A, HLA-B, HLA-C                                                                                                                                                                                                                                        |
| Plasma membrane                                            | $3.7 \times 10^{-5}$  | 2.0        | ANK2, ANK3, APBB1IP, BNC2, CHRN3, CPE, DLG2, EMID2, FHIT, FRAS1, GRIN2A, HLA-A, HLA-B, HLA-C, HLA-DPA1, HLA-DPB1, HLA-DQA1, HLA-DQB1, HLA-DRA, HLA-DRB1, HLA-DRB5, IGSF5, ITGA1, KCNJ12, MAGI2, OR4C3, OR4C45, OR51B6, OR51F1, OR5W2, RGS6, RIMBP2, SLC2A9, TRPC6 |
| Cell junction                                              | $9.6 \times 10^{-5}$  | 3.4        | ANK2, ANK3, APBB1IP, CDSN, CHRN3, CTNNA3, DLG2, GRIN2A, IGSF5, MAGI2, POLR1E, RIMBP2, TRPC6                                                                                                                                                                       |
| MHC class I protein complex                                | $1.8 \times 10^{-4}$  | 27.0       | HLA-A, HLA-B, HLA-C                                                                                                                                                                                                                                               |

GO categories in which false discovery rate is less than 0.01.
