# Supplementary material for: A Model-Based Approach for Identifying Signatures of Ancient Balancing Selection in Genetic Data
Source: PubMed Central journal article supplement (PMC4140648; doi:10.1371/journal.pgen.1004561), 2014-08-21
Supplement: pgen.1004561.s039.pdf [file pgen.1004561.s039.pdf]

Table S13: GO component analysis of top 100 signals, when compared to all signals, from YRI population using the  $T_1$  test statistic.

| Description                                                | $p$ -value            | Enrichment | Genes                                                                                                       |
|------------------------------------------------------------|-----------------------|------------|-------------------------------------------------------------------------------------------------------------|
| Integral to luminal side of endoplasmic reticulum membrane | $9.9 \times 10^{-17}$ | 67.6       | HLA-A, HLA-B, HLA-C, HLA-DPA1, HLA-DPB1, HLA-DQA1, HLA-DQB1, HLA-DRA, HLA-DRB1, HLA-DRB5                    |
| ER to Golgi transport vesicle membrane                     | $8.8 \times 10^{-16}$ | 56.3       | HLA-A, HLA-B, HLA-C, HLA-DPA1, HLA-DPB1, HLA-DQA1, HLA-DQB1, HLA-DRA, HLA-DRB1, HLA-DRB5                    |
| MHC protein complex                                        | $3.8 \times 10^{-15}$ | 49.7       | HLA-A, HLA-B, HLA-C, HLA-DPA1, HLA-DPB1, HLA-DQA1, HLA-DQB1, HLA-DRA, HLA-DRB1, HLA-DRB5                    |
| Transport vesicle membrane                                 | $1.7 \times 10^{-14}$ | 33.8       | CPE, HLA-A, HLA-B, HLA-C, HLA-DPA1, HLA-DPB1, HLA-DQA1, HLA-DQB1, HLA-DRA, HLA-DRB1, HLA-DRB5               |
| MHC class II protein complex                               | $6.7 \times 10^{-13}$ | 84.5       | HLA-DPA1, HLA-DPB1, HLA-DQA1, HLA-DQB1, HLA-DRA, HLA-DRB1, HLA-DRB5                                         |
| Endocytic vesicle membrane                                 | $1.3 \times 10^{-12}$ | 23.2       | DMBT1, HLA-A, HLA-B, HLA-C, HLA-DPA1, HLA-DPB1, HLA-DQA1, HLA-DQB1, HLA-DRA, HLA-DRB1, HLA-DRB5             |
| Clathrin-coated endocytic vesicle membrane                 | $3.2 \times 10^{-11}$ | 53.8       | HLA-DPA1, HLA-DPB1, HLA-DQA1, HLA-DQB1, HLA-DRA, HLA-DRB1, HLA-DRB5                                         |
| Integral to endoplasmic reticulum membrane                 | $7.1 \times 10^{-11}$ | 19.9       | HLA-A, HLA-B, HLA-C, HLA-DPA1, HLA-DPB1, HLA-DQA1, HLA-DQB1, HLA-DRA, HLA-DRB1, HLA-DRB5                    |
| Trans-Golgi network membrane                               | $1.6 \times 10^{-10}$ | 43.8       | HLA-DPA1, HLA-DPB1, HLA-DQA1, HLA-DQB1, HLA-DRA, HLA-DRB1, HLA-DRB5                                         |
| Intrinsic to endoplasmic reticulum membrane                | $4.0 \times 10^{-10}$ | 16.7       | HLA-A, HLA-B, HLA-C, HLA-DPA1, HLA-DPB1, HLA-DQA1, HLA-DQB1, HLA-DRA, HLA-DRB1, HLA-DRB5                    |
| Coated vesicle membrane                                    | $7.1 \times 10^{-10}$ | 15.8       | HLA-A, HLA-B, HLA-C, HLA-DPA1, HLA-DPB1, HLA-DQA1, HLA-DQB1, HLA-DRA, HLA-DRB1, HLA-DRB5                    |
| Cytoplasmic vesicle membrane                               | $1.4 \times 10^{-8}$  | 7.6        | CPE, DMBT1, HLA-A, HLA-B, HLA-C, HLA-DPA1, HLA-DPB1, HLA-DQA1, HLA-DQB1, HLA-DRA, HLA-DRB1, HLA-DRB5, SNX19 |
| Vesicle membrane                                           | $2.3 \times 10^{-8}$  | 7.3        | CPE, DMBT1, HLA-A, HLA-B, HLA-C, HLA-DPA1, HLA-DPB1, HLA-DQA1, HLA-DQB1, HLA-DRA, HLA-DRB1, HLA-DRB5, SNX19 |
| Integral to organelle membrane                             | $8.8 \times 10^{-8}$  | 9.6        | HLA-A, HLA-B, HLA-C, HLA-DPA1, HLA-DPB1, HLA-DQA1, HLA-DQB1, HLA-DRA, HLA-DRB1, HLA-DRB5                    |
| Intrinsic to organelle membrane                            | $2.5 \times 10^{-7}$  | 8.6        | HLA-A, HLA-B, HLA-C, HLA-DPA1, HLA-DPB1, HLA-DQA1, HLA-DQB1, HLA-DRA, HLA-DRB1, HLA-DRB5                    |
| Cytoplasmic vesicle part                                   | $2.9 \times 10^{-7}$  | 5.9        | CPE, DMBT1, HLA-A, HLA-B, HLA-C, HLA-DPA1, HLA-DPB1, HLA-DQA1, HLA-DQB1, HLA-DRA, HLA-DRB1, HLA-DRB5, SNX19 |
| Clathrin-coated vesicle membrane                           | $6.9 \times 10^{-7}$  | 13.9       | HLA-DPA1, HLA-DPB1, HLA-DQA1, HLA-DQB1, HLA-DRA, HLA-DRB1, HLA-DRB5                                         |
| Endosome membrane                                          | $6.7 \times 10^{-6}$  | 6.0        | HLA-A, HLA-B, HLA-C, HLA-DPA1, HLA-DPB1, HLA-DQA1, HLA-DQB1, HLA-DRA, HLA-DRB1, HLA-DRB5                    |
| Lysosomal membrane                                         | $9.2 \times 10^{-6}$  | 9.5        | HLA-DPA1, HLA-DPB1, HLA-DQA1, HLA-DQB1, HLA-DRA, HLA-DRB1, HLA-DRB5                                         |
| Endosomal part                                             | $1.0 \times 10^{-5}$  | 5.7        | HLA-A, HLA-B, HLA-C, HLA-DPA1, HLA-DPB1, HLA-DQA1, HLA-DQB1, HLA-DRA, HLA-DRB1, HLA-DRB5                    |
| Phagocytic vesicle membrane                                | $2.4 \times 10^{-5}$  | 23.3       | DMBT1, HLA-A, HLA-B, HLA-C                                                                                  |
| Vacuolar membrane                                          | $2.8 \times 10^{-5}$  | 8.0        | HLA-DPA1, HLA-DPB1, HLA-DQA1, HLA-DQB1, HLA-DRA, HLA-DRB1, HLA-DRB5                                         |
| Vacuolar part                                              | $6.4 \times 10^{-5}$  | 5.9        | GALC, HLA-DPA1, HLA-DPB1, HLA-DQA1, HLA-DQB1, HLA-DRA, HLA-DRB1, HLA-DRB5                                   |

GO categories in which false discovery rate is less than 0.01.
