# Supplementary material for: A Model-Based Approach for Identifying Signatures of Ancient Balancing Selection in Genetic Data
Source: PubMed Central journal article supplement (PMC4140648; doi:10.1371/journal.pgen.1004561), 2014-08-21
Supplement: pgen.1004561.s040.pdf [file pgen.1004561.s040.pdf]

Table S14: GO component analysis of top 100 signals, when compared to all signals, from CEU population using the  $T_2$  test statistic.

| Description                                                | $p$ -value            | Enrichment | Genes                                                                                                   |
|------------------------------------------------------------|-----------------------|------------|---------------------------------------------------------------------------------------------------------|
| Integral to luminal side of endoplasmic reticulum membrane | $8.5 \times 10^{-15}$ | 62.8       | HLA-A, HLA-B, HLA-C, HLA-DPA1, HLA-DPB1, HLA-DQA1, HLA-DQB1, HLA-DRA, HLA-DRB1                          |
| ER to Golgi transport vesicle membrane                     | $5.8 \times 10^{-14}$ | 52.3       | HLA-A, HLA-B, HLA-C, HLA-DPA1, HLA-DPB1, HLA-DQA1, HLA-DQB1, HLA-DRA, HLA-DRB1                          |
| MHC protein complex                                        | $2.1 \times 10^{-13}$ | 46.2       | HLA-A, HLA-B, HLA-C, HLA-DPA1, HLA-DPB1, HLA-DQA1, HLA-DQB1, HLA-DRA, HLA-DRB1                          |
| Transport vesicle membrane                                 | $5.5 \times 10^{-13}$ | 31.7       | CPE, HLA-A, HLA-B, HLA-C, HLA-DPA1, HLA-DPB1, HLA-DQA1, HLA-DQB1, HLA-DRA, HLA-DRB1                     |
| Endocytic vesicle membrane                                 | $9.0 \times 10^{-13}$ | 24.0       | CUBN, DMBT1, HLA-A, HLA-B, HLA-C, HLA-DPA1, HLA-DPB1, HLA-DQA1, HLA-DQB1, HLA-DRA, HLA-DRB1             |
| MHC class II protein complex                               | $8.7 \times 10^{-11}$ | 74.8       | HLA-DPA1, HLA-DPB1, HLA-DQA1, HLA-DQB1, HLA-DRA, HLA-DRB1                                               |
| Integral to endoplasmic reticulum membrane                 | $1.3 \times 10^{-9}$  | 18.5       | HLA-A, HLA-B, HLA-C, HLA-DPA1, HLA-DPB1, HLA-DQA1, HLA-DQB1, HLA-DRA, HLA-DRB1                          |
| Clathrin-coated endocytic vesicle membrane                 | $2.1 \times 10^{-9}$  | 47.6       | HLA-DPA1, HLA-DPB1, HLA-DQA1, HLA-DQB1, HLA-DRA, HLA-DRB1                                               |
| Intrinsic to endoplasmic reticulum membrane                | $6.1 \times 10^{-9}$  | 15.6       | HLA-A, HLA-B, HLA-C, HLA-DPA1, HLA-DPB1, HLA-DQA1, HLA-DQB1, HLA-DRA, HLA-DRB1                          |
| Trans-Golgi network membrane                               | $8.1 \times 10^{-9}$  | 38.8       | HLA-DPA1, HLA-DPB1, HLA-DQA1, HLA-DQB1, HLA-DRA, HLA-DRB1                                               |
| Cytoplasmic vesicle membrane                               | $9.7 \times 10^{-9}$  | 7.9        | CPE, CUBN, DMBT1, HLA-A, HLA-B, HLA-C, HLA-DPA1, HLA-DPB1, HLA-DQA1, HLA-DQB1, HLA-DRA, HLA-DRB1, SNX19 |
| Coated vesicle membrane                                    | $1.0 \times 10^{-8}$  | 14.7       | HLA-A, HLA-B, HLA-C, HLA-DPA1, HLA-DPB1, HLA-DQA1, HLA-DQB1, HLA-DRA, HLA-DRB1                          |
| Vesicle membrane                                           | $1.6 \times 10^{-8}$  | 7.6        | CPE, CUBN, DMBT1, HLA-A, HLA-B, HLA-C, HLA-DPA1, HLA-DPB1, HLA-DQA1, HLA-DQB1, HLA-DRA, HLA-DRB1, SNX19 |
| Cytoplasmic vesicle part                                   | $2.0 \times 10^{-7}$  | 6.1        | CPE, CUBN, DMBT1, HLA-A, HLA-B, HLA-C, HLA-DPA1, HLA-DPB1, HLA-DQA1, HLA-DQB1, HLA-DRA, HLA-DRB1, SNX19 |
| Integral to organelle membrane                             | $7.5 \times 10^{-7}$  | 8.9        | HLA-A, HLA-B, HLA-C, HLA-DPA1, HLA-DPB1, HLA-DQA1, HLA-DQB1, HLA-DRA, HLA-DRB1                          |
| Intrinsic to organelle membrane                            | $1.9 \times 10^{-6}$  | 8.0        | HLA-A, HLA-B, HLA-C, HLA-DPA1, HLA-DPB1, HLA-DQA1, HLA-DQB1, HLA-DRA, HLA-DRB1                          |
| Endosome membrane                                          | $5.0 \times 10^{-6}$  | 6.2        | CUBN, HLA-A, HLA-B, HLA-C, HLA-DPA1, HLA-DPB1, HLA-DQA1, HLA-DQB1, HLA-DRA, HLA-DRB1                    |
| Lysosomal membrane                                         | $7.4 \times 10^{-6}$  | 9.8        | CUBN, HLA-DPA1, HLA-DPB1, HLA-DQA1, HLA-DQB1, HLA-DRA, HLA-DRB1                                         |
| Endosomal part                                             | $7.7 \times 10^{-6}$  | 5.9        | CUBN, HLA-A, HLA-B, HLA-C, HLA-DPA1, HLA-DPB1, HLA-DQA1, HLA-DQB1, HLA-DRA, HLA-DRB1                    |
| Clathrin-coated vesicle membrane                           | $9.2 \times 10^{-6}$  | 12.3       | HLA-DPA1, HLA-DPB1, HLA-DQA1, HLA-DQB1, HLA-DRA, HLA-DRB1                                               |
| Phagocytic vesicle membrane                                | $2.2 \times 10^{-5}$  | 24.1       | DMBT1, HLA-A, HLA-B, HLA-C                                                                              |
| Vacuolar membrane                                          | $2.2 \times 10^{-5}$  | 8.3        | CUBN, HLA-DPA1, HLA-DPB1, HLA-DQA1, HLA-DQB1, HLA-DRA, HLA-DRB1                                         |
| Vacuolar part                                              | $5.1 \times 10^{-5}$  | 6.1        | CUBN, GPC5, HLA-DPA1, HLA-DPB1, HLA-DQA1, HLA-DQB1, HLA-DRA, HLA-DRB1                                   |

GO categories in which false discovery rate is less than 0.01.
