# Supplementary material for: A Model-Based Approach for Identifying Signatures of Ancient Balancing Selection in Genetic Data
Source: PubMed Central journal article supplement (PMC4140648; doi:10.1371/journal.pgen.1004561), 2014-08-21
Supplement: pgen.1004561.s041.pdf [file pgen.1004561.s041.pdf]

Table S15: GO component analysis of top 100 signals, when compared to all signals, from YRI population using the  $T_2$  test statistic.

| Description                                                | $p$ -value            | Enrichment | Genes                                                                                         |
|------------------------------------------------------------|-----------------------|------------|-----------------------------------------------------------------------------------------------|
| Integral to luminal side of endoplasmic reticulum membrane | $8.3 \times 10^{-11}$ | 47.8       | HLA-A, HLA-B, HLA-C, HLA-DPA1, HLA-DPB1, HLA-DQB1, HLA-DRB5                                   |
| ER to Golgi transport vesicle membrane                     | $3.4 \times 10^{-10}$ | 39.9       | HLA-A, HLA-B, HLA-C, HLA-DPA1, HLA-DPB1, HLA-DQB1, HLA-DRB5                                   |
| MHC protein complex                                        | $8.9 \times 10^{-10}$ | 35.2       | HLA-A, HLA-B, HLA-C, HLA-DPA1, HLA-DPB1, HLA-DQB1, HLA-DRB5                                   |
| Transport vesicle membrane                                 | $9.9 \times 10^{-10}$ | 24.9       | CPE, HLA-A, HLA-B, HLA-C, HLA-DPA1, HLA-DPB1, HLA-DQB1, HLA-DRB5                              |
| Endocytic vesicle membrane                                 | $2.1 \times 10^{-8}$  | 17.1       | DMBT1, HLA-A, HLA-B, HLA-C, HLA-DPA1, HLA-DPB1, HLA-DQB1, HLA-DRB5                            |
| Cytoplasmic vesicle membrane                               | $1.1 \times 10^{-7}$  | 7.1        | CPE, DMBT1, HLA-A, HLA-B, HLA-C, HLA-DPA1, HLA-DPB1, HLA-DQB1, HLA-DRB5, MARCH1, MYO5B, SNX19 |
| Vesicle membrane                                           | $1.8 \times 10^{-7}$  | 6.8        | CPE, DMBT1, HLA-A, HLA-B, HLA-C, HLA-DPA1, HLA-DPB1, HLA-DQB1, HLA-DRB5, MARCH1, MYO5B, SNX19 |
| Trans-Golgi network membrane                               | $4.5 \times 10^{-7}$  | 31.6       | HLA-DPA1, HLA-DPB1, HLA-DQB1, HLA-DRB5, MARCH1                                                |
| Integral to endoplasmic reticulum membrane                 | $6.4 \times 10^{-7}$  | 14.1       | HLA-A, HLA-B, HLA-C, HLA-DPA1, HLA-DPB1, HLA-DQB1, HLA-DRB5                                   |
| MHC class II protein complex                               | $1.1 \times 10^{-6}$  | 48.8       | HLA-DPA1, HLA-DPB1, HLA-DQB1, HLA-DRB5                                                        |
| Cytoplasmic vesicle part                                   | $1.8 \times 10^{-6}$  | 5.5        | CPE, DMBT1, HLA-B, HLA-C, HLA-DPA1, HLA-DPB1, HLA-DQB1, HLA-DRB5, MARCH1, MYO5B, SNX19        |
| Intrinsic to endoplasmic reticulum membrane                | $2.1 \times 10^{-6}$  | 11.8       | HLA-A, HLA-B, HLA-C, HLA-DPA1, HLA-DPB1, HLA-DQB1, HLA-DRB5                                   |
| Coated vesicle membrane                                    | $3.1 \times 10^{-6}$  | 11.2       | HLA-A, HLA-B, HLA-C, HLA-DPA1, HLA-DPB1, HLA-DQB1, HLA-DRB5                                   |
| Clathrin-coated endocytic vesicle membrane                 | $7.4 \times 10^{-6}$  | 31.1       | HLA-DPA1, HLA-DPB1, HLA-DQB1, HLA-DRB5                                                        |
| Phagocytic vesicle membrane                                | $2.3 \times 10^{-5}$  | 23.6       | DMBT1, HLA-A, HLA-B, HLA-C                                                                    |
| Integral to organelle membrane                             | $7.8 \times 10^{-5}$  | 6.8        | HLA-A, HLA-B, HLA-C, HLA-DPA1, HLA-DPB1, HLA-DQB1, HLA-DRB5                                   |

GO categories in which false discovery rate is less than 0.01.
