# Supplementary material for: A Model-Based Approach for Identifying Signatures of Ancient Balancing Selection in Genetic Data
Source: PubMed Central journal article supplement (PMC4140648; doi:10.1371/journal.pgen.1004561), 2014-08-21
Supplement: pgen.1004561.s042.pdf [file pgen.1004561.s042.pdf]

Table S16: GO process analysis of ranked signals from CEU population using the  $T_1$  test statistic.

| Description                                                                                      | $p$ -value            | Enrichment | Genes                                                                                                                                                                                                                                                                                                                                                                                                                                                                                                                                                                                                                                                                                                                                                                                                                                                                                                                                                                                                                                                       |
|--------------------------------------------------------------------------------------------------|-----------------------|------------|-------------------------------------------------------------------------------------------------------------------------------------------------------------------------------------------------------------------------------------------------------------------------------------------------------------------------------------------------------------------------------------------------------------------------------------------------------------------------------------------------------------------------------------------------------------------------------------------------------------------------------------------------------------------------------------------------------------------------------------------------------------------------------------------------------------------------------------------------------------------------------------------------------------------------------------------------------------------------------------------------------------------------------------------------------------|
| Interferon-gamma-mediated signaling pathway                                                      | $4.6 \times 10^{-14}$ | 108.4      | HLA-A, HLA-B, HLA-C, HLA-DPA1, HLA-DPB1, HLA-DQA1, HLA-DQB1, HLA-DRB1                                                                                                                                                                                                                                                                                                                                                                                                                                                                                                                                                                                                                                                                                                                                                                                                                                                                                                                                                                                       |
| Cellular response to interferon-gamma                                                            | $3.0 \times 10^{-13}$ | 87.6       | HLA-A, HLA-B, HLA-C, HLA-DPA1, HLA-DPB1, HLA-DQA1, HLA-DQB1, HLA-DRB1                                                                                                                                                                                                                                                                                                                                                                                                                                                                                                                                                                                                                                                                                                                                                                                                                                                                                                                                                                                       |
| Biological adhesion                                                                              | $6.6 \times 10^{-13}$ | 1.9        | ACTN2, ADAM12, AJAP1, AMTN, ANGPT1, APP, B4GALTI, BMPR1B, CADM2, CD151, CDH10, CDH13, CDH23, CDH4, CDH9, CDHR2, CDON, CDSN, CFDP1, CHL1, CLCA2, CLDN1, CLDN10, CLDN14, CLDN20, CLSTN2, CNTN1, CNTN4, CNTN5, CNTNAP2, CNTNAP4, CNTNAP5, COL13A1, COL4A3, COL5A1, CPXM2, CTNNA3, CXADR, CXCL12, DAB1, DCHS2, DDR1, DPT, DSC1, DSCAM, DSG1, EMR1, EMR2, ENTPD1, EPHB1, F5, FAT2, FAT3, FAT4, FER, HABP2, HPSE, IGFBP7, IGSF5, ITGA1, ITGA11, ITGA2, ITGA9, ITGB3, ITGB5, ITGBL1, KIFC3, LAMA1, LAMA2, LAMC1, LAMC2, LOXL2, LPP, LSAMP, MAG11, MEGF10, MEGF11, MTSS1, NCAM2, NELL2, NFASC, NID2, NINJ2, NRCAM, NRP1, NRXN1, NRXN3, NTM, NTN1, ODZ3, OPCML, PARVB, PCDH15, PCDH17, PCDHA1, PCDHA10, PCDHA11, PCDHA12, PCDHA13, PCDHA2, PCDHA3, PCDHA4, PCDHA5, PCDHA6, PCDHA7, PCDHA8, PCDHA9, PCDHAC1, PDZD2, PKD1L1, PKHD1, PKP1, PKP2, PLEK, PLEKHA7, PLXNC1, PPFIBP1, PRKCA, PRKCE, PRPH2, PTPRD, PTPRF, PTPRM, PTPRT, PTPRU, RELN, ROBO2, ROR2, RPSA, SCARB1, SDK1, SEMA5A, SIRPA, SORBS1, SPON1, SSPO, SVEP1, SYK, TEK, THBS2, TMEM8A, TNN, TNR, VNN1, VWF |
| Cell adhesion                                                                                    | $6.6 \times 10^{-13}$ | 1.9        | ACTN2, ADAM12, AJAP1, AMTN, ANGPT1, APP, B4GALTI, BMPR1B, CADM2, CD151, CDH10, CDH13, CDH23, CDH4, CDH9, CDHR2, CDON, CDSN, CFDP1, CHL1, CLCA2, CLDN1, CLDN10, CLDN14, CLDN20, CLSTN2, CNTN1, CNTN4, CNTN5, CNTNAP2, CNTNAP4, CNTNAP5, COL13A1, COL4A3, COL5A1, CPXM2, CTNNA3, CXADR, CXCL12, DAB1, DCHS2, DDR1, DPT, DSC1, DSCAM, DSG1, EMR1, EMR2, ENTPD1, EPHB1, F5, FAT2, FAT3, FAT4, FER, HABP2, HPSE, IGFBP7, IGSF5, ITGA1, ITGA11, ITGA2, ITGA9, ITGB3, ITGB5, ITGBL1, KIFC3, LAMA1, LAMA2, LAMC1, LAMC2, LOXL2, LPP, LSAMP, MAG11, MEGF10, MEGF11, MTSS1, NCAM2, NELL2, NFASC, NID2, NINJ2, NRCAM, NRP1, NRXN1, NRXN3, NTM, NTN1, ODZ3, OPCML, PARVB, PCDH15, PCDH17, PCDHA1, PCDHA10, PCDHA11, PCDHA12, PCDHA13, PCDHA2, PCDHA3, PCDHA4, PCDHA5, PCDHA6, PCDHA7, PCDHA8, PCDHA9, PCDHAC1, PDZD2, PKD1L1, PKHD1, PKP1, PKP2, PLEK, PLEKHA7, PLXNC1, PPFIBP1, PRKCA, PRKCE, PRPH2, PTPRD, PTPRF, PTPRM, PTPRT, PTPRU, RELN, ROBO2, ROR2, RPSA, SCARB1, SDK1, SEMA5A, SIRPA, SORBS1, SPON1, SSPO, SVEP1, SYK, TEK, THBS2, TMEM8A, TNN, TNR, VNN1, VWF |
| Response to interferon-gamma                                                                     | $1.6 \times 10^{-12}$ | 71.9       | HLA-A, HLA-B, HLA-C, HLA-DPA1, HLA-DQA1, HLA-DQB1, HLA-DRB1                                                                                                                                                                                                                                                                                                                                                                                                                                                                                                                                                                                                                                                                                                                                                                                                                                                                                                                                                                                                 |
| Antigen processing and presentation of exogenous peptide antigen                                 | $3.0 \times 10^{-11}$ | 43.5       | HLA-A, HLA-B, HLA-C, HLA-DPA1, HLA-DPB1, HLA-DQA1, HLA-DQB1, HLA-DRB1                                                                                                                                                                                                                                                                                                                                                                                                                                                                                                                                                                                                                                                                                                                                                                                                                                                                                                                                                                                       |
| Antigen processing and presentation of exogenous antigen                                         | $3.2 \times 10^{-11}$ | 43.0       | HLA-A, HLA-B, HLA-C, HLA-DPA1, HLA-DPB1, HLA-DQA1, HLA-DQB1, HLA-DRB1                                                                                                                                                                                                                                                                                                                                                                                                                                                                                                                                                                                                                                                                                                                                                                                                                                                                                                                                                                                       |
| Antigen processing and presentation of peptide antigen                                           | $4.1 \times 10^{-11}$ | 31.0       | ERAP1, HLA-A, HLA-B, HLA-C, HLA-DPA1, HLA-DPB1, HLA-DQA1, HLA-DQB1, HLA-DRB1                                                                                                                                                                                                                                                                                                                                                                                                                                                                                                                                                                                                                                                                                                                                                                                                                                                                                                                                                                                |
| Antigen processing and presentation                                                              | $1.7 \times 10^{-10}$ | 27.2       | ERAP1, HLA-A, HLA-B, HLA-C, HLA-DPA1, HLA-DPB1, HLA-DQA1, HLA-DQB1, HLA-DRB1                                                                                                                                                                                                                                                                                                                                                                                                                                                                                                                                                                                                                                                                                                                                                                                                                                                                                                                                                                                |
| Cell-cell adhesion                                                                               | $1.6 \times 10^{-9}$  | 2.9        | BMPR1B, CDH10, CDH13, CDH4, CDSN, CLDN10, CLDN14, CNTN4, COL13A1, CTNNA3, DCHS2, DSC1, DSG1, FAT2, IGSF5, MEGF11, NRCAM, NRXN1, NTN1, ODZ3, PCDH15, PCDHA1, PCDHA10, PCDHA11, PCDHA12, PCDHA13, PCDHA2, PCDHA3, PCDHA4, PCDHA5, PCDHA6, PCDHA7, PCDHA8, PCDHA9, PCDHAC1, PKD1L1, PKHD1, PLEK, PTPRD, PTPRM, ROBO2, SYK, TEK, VNN1                                                                                                                                                                                                                                                                                                                                                                                                                                                                                                                                                                                                                                                                                                                           |
| Regulation of immune response                                                                    | $2.1 \times 10^{-9}$  | 13.3       | DMBT1, ERAP1, HLA-A, HLA-B, HLA-C, HLA-DPA1, HLA-DPB1, HLA-DQA1, HLA-DQB1, HLA-DRB1, MAP2K3                                                                                                                                                                                                                                                                                                                                                                                                                                                                                                                                                                                                                                                                                                                                                                                                                                                                                                                                                                 |
| Antigen processing and presentation of exogenous peptide antigen via MHC class I TAP-independent | $2.8 \times 10^{-9}$  | 1352.2     | HLA-A, HLA-B, HLA-C                                                                                                                                                                                                                                                                                                                                                                                                                                                                                                                                                                                                                                                                                                                                                                                                                                                                                                                                                                                                                                         |
| Cytokine-mediated signaling pathway                                                              | $4.2 \times 10^{-9}$  | 24.0       | HLA-A, HLA-B, HLA-C, HLA-DPA1, HLA-DPB1, HLA-DQA1, HLA-DQB1, HLA-DRB1                                                                                                                                                                                                                                                                                                                                                                                                                                                                                                                                                                                                                                                                                                                                                                                                                                                                                                                                                                                       |
| Homophilic cell adhesion                                                                         | $9.5 \times 10^{-9}$  | 4.1        | CDH10, CDH13, CDH4, DCHS2, DSC1, DSG1, FAT2, ODZ3, PCDH15, PCDHA1, PCDHA10, PCDHA11, PCDHA12, PCDHA13, PCDHA2, PCDHA3, PCDHA4, PCDHA5, PCDHA6, PCDHA7, PCDHA8, PCDHA9, PCDHAC1, PTPRM, ROBO2                                                                                                                                                                                                                                                                                                                                                                                                                                                                                                                                                                                                                                                                                                                                                                                                                                                                |
| Cellular response to cytokine stimulus                                                           | $3.3 \times 10^{-8}$  | 18.9       | HLA-A, HLA-B, HLA-C, HLA-DPA1, HLA-DPB1, HLA-DQA1, HLA-DQB1, HLA-DRB1                                                                                                                                                                                                                                                                                                                                                                                                                                                                                                                                                                                                                                                                                                                                                                                                                                                                                                                                                                                       |
| Immune response-activating signal transduction                                                   | $4.8 \times 10^{-8}$  | 25.2       | DMBT1, HLA-DPA1, HLA-DPB1, HLA-DQA1, HLA-DQB1, HLA-DRB1, MAP2K3                                                                                                                                                                                                                                                                                                                                                                                                                                                                                                                                                                                                                                                                                                                                                                                                                                                                                                                                                                                             |

GO categories in which false discovery rate is less than 0.01.

Table S16 continued.

| Description                                                                                    | <i>p</i> -value      | Enrichment | Genes                                                                                                                                                                                                                                                                                                                                                                                                                      |
|------------------------------------------------------------------------------------------------|----------------------|------------|----------------------------------------------------------------------------------------------------------------------------------------------------------------------------------------------------------------------------------------------------------------------------------------------------------------------------------------------------------------------------------------------------------------------------|
| Immune response-regulating signaling pathway                                                   | $7.4 \times 10^{-8}$ | 23.7       | <i>DMBT1, HLA-DPA1, HLA-DPB1, HLA-DQA1, HLA-DQB1, HLA-DRB1, MAP2K3</i>                                                                                                                                                                                                                                                                                                                                                     |
| T cell costimulation                                                                           | $9.5 \times 10^{-8}$ | 27.0       | <i>HLA-DPA1, HLA-DPB1, HLA-DQA1, HLA-DQB1, HLA-DRA, HLA-DRB1, HLA-DRB5</i>                                                                                                                                                                                                                                                                                                                                                 |
| Lymphocyte costimulation                                                                       | $1.1 \times 10^{-7}$ | 26.6       | <i>HLA-DPA1, HLA-DPB1, HLA-DQA1, HLA-DQB1, HLA-DRA, HLA-DRB1, HLA-DRB5</i>                                                                                                                                                                                                                                                                                                                                                 |
| Response to cytokine stimulus                                                                  | $1.9 \times 10^{-7}$ | 19.5       | <i>HLA-A, HLA-B, HLA-C, HLA-DPA1, HLA-DPB1, HLA-DQA1, HLA-DQB1</i>                                                                                                                                                                                                                                                                                                                                                         |
| Detection of bacterium                                                                         | $2.1 \times 10^{-7}$ | 49.9       | <i>HLA-A, HLA-B, HLA-DRB1, HLA-DRB5, PGLYRP4</i>                                                                                                                                                                                                                                                                                                                                                                           |
| Activation of immune response                                                                  | $2.4 \times 10^{-7}$ | 20.1       | <i>DMBT1, HLA-DPA1, HLA-DPB1, HLA-DQA1, HLA-DQB1, HLA-DRB1, MAP2K3</i>                                                                                                                                                                                                                                                                                                                                                     |
| T cell receptor signaling pathway                                                              | $3.2 \times 10^{-7}$ | 56.2       | <i>HLA-DPA1, HLA-DPB1, HLA-DQA1, HLA-DQB1, HLA-DRB1</i>                                                                                                                                                                                                                                                                                                                                                                    |
| Regulation of immune system process                                                            | $4.5 \times 10^{-7}$ | 8.0        | <i>DMBT1, ERAP1, HLA-A, HLA-B, HLA-C, HLA-DPA1, HLA-DPB1, HLA-DQA1, HLA-DQB1, HLA-DRB1, MAP2K3</i>                                                                                                                                                                                                                                                                                                                         |
| Antigen processing and presentation of exogenous peptide antigen via MHC class II              | $5.2 \times 10^{-7}$ | 50.8       | <i>HLA-DPA1, HLA-DPB1, HLA-DQA1, HLA-DQB1, HLA-DRB1</i>                                                                                                                                                                                                                                                                                                                                                                    |
| Antigen processing and presentation of peptide or polysaccharide antigen via MHC class II      | $6.0 \times 10^{-7}$ | 49.7       | <i>HLA-DPA1, HLA-DPB1, HLA-DQA1, HLA-DQB1, HLA-DRB1</i>                                                                                                                                                                                                                                                                                                                                                                    |
| Antigen processing and presentation of peptide antigen via MHC class II                        | $6.0 \times 10^{-7}$ | 49.7       | <i>HLA-DPA1, HLA-DPB1, HLA-DQA1, HLA-DQB1, HLA-DRB1</i>                                                                                                                                                                                                                                                                                                                                                                    |
| Regulation of potassium ion transport                                                          | $1.1 \times 10^{-6}$ | 13.1       | <i>ANK2, ANK3, CASQ2, DPP6, NEDD4, NEDD4L, PLCB4, STK39</i>                                                                                                                                                                                                                                                                                                                                                                |
| Antigen receptor-mediated signaling pathway                                                    | $1.2 \times 10^{-6}$ | 43.6       | <i>HLA-DPA1, HLA-DPB1, HLA-DQA1, HLA-DQB1, HLA-DRB1</i>                                                                                                                                                                                                                                                                                                                                                                    |
| Positive regulation of immune response                                                         | $1.6 \times 10^{-6}$ | 15.4       | <i>DMBT1, HLA-DPA1, HLA-DPB1, HLA-DQA1, HLA-DQB1, HLA-DRB1, MAP2K3</i>                                                                                                                                                                                                                                                                                                                                                     |
| Immune response-activating cell surface receptor signaling pathway                             | $1.6 \times 10^{-6}$ | 41.1       | <i>HLA-DPA1, HLA-DPB1, HLA-DQA1, HLA-DQB1, HLA-DRB1</i>                                                                                                                                                                                                                                                                                                                                                                    |
| Protein localization to membrane                                                               | $1.9 \times 10^{-6}$ | 13.1       | <i>ANK2, ANK3, CPE, DLG2, MAGI2, RAMP3, RELN, SCP2</i>                                                                                                                                                                                                                                                                                                                                                                     |
| Immune response-regulating cell surface receptor signaling pathway                             | $2.6 \times 10^{-6}$ | 37.5       | <i>HLA-DPA1, HLA-DPB1, HLA-DQA1, HLA-DQB1, HLA-DRB1</i>                                                                                                                                                                                                                                                                                                                                                                    |
| Cellular response to type I interferon                                                         | $2.9 \times 10^{-6}$ | 190.2      | <i>HLA-A, HLA-B, HLA-C</i>                                                                                                                                                                                                                                                                                                                                                                                                 |
| Type I interferon-mediated signaling pathway                                                   | $2.9 \times 10^{-6}$ | 190.2      | <i>HLA-A, HLA-B, HLA-C</i>                                                                                                                                                                                                                                                                                                                                                                                                 |
| Response to type I interferon                                                                  | $3.0 \times 10^{-6}$ | 187.2      | <i>HLA-A, HLA-B, HLA-C</i>                                                                                                                                                                                                                                                                                                                                                                                                 |
| Immune response                                                                                | $3.2 \times 10^{-6}$ | 8.9        | <i>DMBT1, HLA-A, HLA-B, HLA-C, HLA-DPA1, HLA-DQA1, HLA-DQB1, HLA-DRB1, MAP2K3</i>                                                                                                                                                                                                                                                                                                                                          |
| Positive regulation of T cell activation                                                       | $4.0 \times 10^{-6}$ | 27.7       | <i>HLA-DPA1, HLA-DPB1, HLA-DQA1, HLA-DQB1, HLA-DRB1</i>                                                                                                                                                                                                                                                                                                                                                                    |
| Antigen processing and presentation of exogenous peptide antigen via MHC class I TAP-dependent | $4.4 \times 10^{-6}$ | 169.0      | <i>HLA-A, HLA-B, HLA-C</i>                                                                                                                                                                                                                                                                                                                                                                                                 |
| Antigen processing and presentation of exogenous peptide antigen via MHC class I               | $5.0 \times 10^{-6}$ | 160.1      | <i>HLA-A, HLA-B, HLA-C</i>                                                                                                                                                                                                                                                                                                                                                                                                 |
| Positive regulation of ion transmembrane transporter activity                                  | $5.1 \times 10^{-6}$ | 17.8       | <i>ANK2, ANK3, PLCG2, RELN, RYR2, TRPC6</i>                                                                                                                                                                                                                                                                                                                                                                                |
| Detection of biotic stimulus                                                                   | $6.0 \times 10^{-6}$ | 28.2       | <i>HLA-A, HLA-B, HLA-DRB1, HLA-DRB5, PGLYRP4</i>                                                                                                                                                                                                                                                                                                                                                                           |
| Immunoglobulin production involved in immunoglobulin mediated immune response                  | $6.6 \times 10^{-6}$ | 117.6      | <i>HLA-DQB1, HLA-DRB1, HLA-DRB5</i>                                                                                                                                                                                                                                                                                                                                                                                        |
| Humoral immune response mediated by circulating immunoglobulin                                 | $6.6 \times 10^{-6}$ | 117.6      | <i>HLA-DQB1, HLA-DRB1, HLA-DRB5</i>                                                                                                                                                                                                                                                                                                                                                                                        |
| Regulation of response to stimulus                                                             | $9.9 \times 10^{-6}$ | 3.5        | <i>DMBT1, ERAP1, FXN, HLA-A, HLA-B, HLA-C, HLA-DPA1, HLA-DPB1, HLA-DQA1, HLA-DQB1, HLA-DRB1, KALRN, MAGI2, MAP2K3, RGL1, RGS6, USP20, WWTR1</i>                                                                                                                                                                                                                                                                            |
| Antigen processing and presentation of peptide antigen via MHC class I                         | $9.9 \times 10^{-6}$ | 132.3      | <i>HLA-A, HLA-B, HLA-C</i>                                                                                                                                                                                                                                                                                                                                                                                                 |
| Regulation of potassium ion transmembrane transporter activity                                 | $1.0 \times 10^{-5}$ | 35.3       | <i>ANK2, CASQ2, NEDD4, NEDD4L</i>                                                                                                                                                                                                                                                                                                                                                                                          |
| Positive regulation of lymphocyte activation                                                   | $1.4 \times 10^{-5}$ | 22.1       | <i>HLA-DPA1, HLA-DPB1, HLA-DQA1, HLA-DQB1, HLA-DRB1</i>                                                                                                                                                                                                                                                                                                                                                                    |
| Regulation of ion transmembrane transporter activity                                           | $1.6 \times 10^{-5}$ | 8.2        | <i>ANK2, ANK3, CASQ2, NEDD4, NEDD4L, PLCG2, RELN, RYR2, TRPC6</i>                                                                                                                                                                                                                                                                                                                                                          |
| Immunoglobulin production                                                                      | $1.9 \times 10^{-5}$ | 88.2       | <i>HLA-DQB1, HLA-DRB1, HLA-DRB5</i>                                                                                                                                                                                                                                                                                                                                                                                        |
| Regulation of T cell activation                                                                | $1.9 \times 10^{-5}$ | 20.7       | <i>HLA-DPA1, HLA-DPB1, HLA-DQA1, HLA-DQB1, HLA-DRB1</i>                                                                                                                                                                                                                                                                                                                                                                    |
| Regulation of membrane potential                                                               | $2.1 \times 10^{-5}$ | 2.4        | <i>ABCB5, ACTN2, ADRA1A, ANK2, ANK3, CACNA1A, CASQ2, CNR2, DPP6, GRID2, GRIK2, GRIK3, GRIN2A, GRIN2B, KCNIP1, KCNMB2, KCNMB3, LRRK2, NEDD4, NEDD4L, NRXN1, PEX5L, PIDI, PKP2, RELN, RYR2, SCN10A, SCN1A, SLC1A6, SNCA</i>                                                                                                                                                                                                  |
| Axon guidance                                                                                  | $2.1 \times 10^{-5}$ | 1.9        | <i>ANK2, ANK3, BMPRI1B, CAPI, CDH4, CHL1, CNTN1, CNTN4, COL4A1, COL4A2, COL4A3, COL5A2, COL9A1, CXCL12, DCC, DOCK1, EPHA7, EPHB1, ETV1, ITGA1, ITGA2, ITGA9, ITGB3, KCNQ3, LAMA1, LAMA2, LAMC1, LMX1A, MATN2, MYO10, NCK2, NFASC, NRCAM, NRPI, NRXN1, NRXN3, NTN1, NTN4, PLXNA4, PLXNC1, PTPRM, RAC2, RELN, ROBO2, RPS6KA2, SCN3B, SEMA3A, SEMA3E, SEMA5A, SEMA6D, SH3GL2, SLIT3, SPTB, TNR, TRPC4, TRPC6, UNC5C, VAV2</i> |
| Positive regulation of leukocyte activation                                                    | $2.2 \times 10^{-5}$ | 20.2       | <i>HLA-DPA1, HLA-DPB1, HLA-DQA1, HLA-DQB1, HLA-DRB1</i>                                                                                                                                                                                                                                                                                                                                                                    |
| Response to bacterium                                                                          | $2.5 \times 10^{-5}$ | 19.3       | <i>DMBT1, ERAP1, HLA-A, HLA-B, HLA-DRB1</i>                                                                                                                                                                                                                                                                                                                                                                                |

GO categories in which false discovery rate is less than 0.01.

Table S16 continued.

| Description                                         | <i>p</i> -value      | Enrichment | Genes                                                                                                                                                                                                                                                                                                                                                                                                                                                                                                                                                                                                                                                                                                                                                                                                                                                                                                                                                                              |
|-----------------------------------------------------|----------------------|------------|------------------------------------------------------------------------------------------------------------------------------------------------------------------------------------------------------------------------------------------------------------------------------------------------------------------------------------------------------------------------------------------------------------------------------------------------------------------------------------------------------------------------------------------------------------------------------------------------------------------------------------------------------------------------------------------------------------------------------------------------------------------------------------------------------------------------------------------------------------------------------------------------------------------------------------------------------------------------------------|
| Positive regulation of cell activation              | $2.6 \times 10^{-5}$ | 19.5       | <i>HLA-DPA1, HLA-DPB1, HLA-DQA1, HLA-DQB1, HLA-DRB1</i>                                                                                                                                                                                                                                                                                                                                                                                                                                                                                                                                                                                                                                                                                                                                                                                                                                                                                                                            |
| Ion transport                                       | $2.7 \times 10^{-5}$ | 1.5        | <i>ADD2, ADRA1A, AKR1C4, ANK2, ANO1, ANXA6, AQP8, AQP9, ASIC2, ATP10B, ATP10D, ATP12A, ATP1A4, ATP1B3, ATP2C2, ATP5C1, ATP6V0E2, ATP6V1C2, ATP6V1G2, ATP8A1, ATP8A2, ATP8B1, ATP9A, BSPRY, CACNA1A, CACNA2D1, CACNB2, CAMK2D, CASR, CDH23, CLIC5, CPLX1, EFCAB4B, ENPP1, FGF2, FXN, GABRB2, GABRG3, GABRR1, GLRA3, GRIN3A, ITPR1, KCNA6, KCNAB1, KCNB2, KCNJ12, KCNJ16, KCNK2, KCNMB1, KCNMB2, KCNMB3, KCNQ3, KCNQ4, KLHL3, LHCGR, LTF, LYN, NEDD4L, NMUR1, NMUR2, NTRK2, OCA2, PIEZO1, PIEZO2, PLA2G4A, PLCG2, PLCZ1, PRKAB2, PRKAG2, PRKCE, RAMP3, RIMS1, RYR1, RYR2, RYR3, SCARA5, SCN10A, SCN1A, SCN3A, SCN3B, SCN9A, SCNN1G, SLC10A2, SLC12A6, SLC12A8, SLC15A2, SLC17A5, SLC1A2, SLC1A6, SLC22A16, SLC22A4, SLC22A5, SLC24A4, SLC25A37, SLC27A6, SLC30A9, SLC31A2, SLC38A4, SLC38A8, SLC38A9, SLC39A11, SLC39A14, SLC39A8, SLC4A7, SLC5A12, SLC7A7, SLC8A1, SLC8A3, SLC9A4, SLC9A8, SLC9A9, SLC9C1, SLC01B1, SLC01B3, SLC01C1, SNCA, SYK, TG, TRPA1, TRPC4, TRPC6, TRPM3</i> |
| Immune system process                               | $2.9 \times 10^{-5}$ | 7.5        | <i>DMBT1, HLA-A, HLA-B, HLA-C, HLA-DPA1, HLA-DPB1, HLA-DQA1, HLA-DQB1</i>                                                                                                                                                                                                                                                                                                                                                                                                                                                                                                                                                                                                                                                                                                                                                                                                                                                                                                          |
| Regulation of transmembrane transporter activity    | $3.0 \times 10^{-5}$ | 7.6        | <i>ANK2, ANK3, CASQ2, NEDD4, NEDD4L, PLCG2, RELN, RYR2, TRPC6</i>                                                                                                                                                                                                                                                                                                                                                                                                                                                                                                                                                                                                                                                                                                                                                                                                                                                                                                                  |
| Positive regulation of transporter activity         | $3.9 \times 10^{-5}$ | 13.2       | <i>ANK2, ANK3, PLCG2, RELN, RYR2, TRPC6</i>                                                                                                                                                                                                                                                                                                                                                                                                                                                                                                                                                                                                                                                                                                                                                                                                                                                                                                                                        |
| Regulation of potassium ion transmembrane transport | $4.0 \times 10^{-5}$ | 27.4       | <i>ANK2, CASQ2, NEDD4, NEDD4L</i>                                                                                                                                                                                                                                                                                                                                                                                                                                                                                                                                                                                                                                                                                                                                                                                                                                                                                                                                                  |
| Positive regulation of immune system process        | $4.4 \times 10^{-5}$ | 9.6        | <i>DMBT1, HLA-DPA1, HLA-DPB1, HLA-DQA1, HLA-DQB1, HLA-DRB1, MAP2K3</i>                                                                                                                                                                                                                                                                                                                                                                                                                                                                                                                                                                                                                                                                                                                                                                                                                                                                                                             |
| Regulation of transporter activity                  | $4.8 \times 10^{-5}$ | 3.2        | <i>ANK2, ANK3, CAMK2D, CASQ2, CNIH3, DAPK1, EFCAB4B, MYO5A, NEDD4, NEDD4L, NRXN1, PLCG2, PON1, RELN, RYR2, SNCA, TESC, TRDN, TRPC6</i>                                                                                                                                                                                                                                                                                                                                                                                                                                                                                                                                                                                                                                                                                                                                                                                                                                             |
| Phospholipid transport                              | $5.4 \times 10^{-5}$ | 12.7       | <i>ABCA1, ABCA4, ATP10D, ATP8A1, SCARB1, SCP2</i>                                                                                                                                                                                                                                                                                                                                                                                                                                                                                                                                                                                                                                                                                                                                                                                                                                                                                                                                  |

GO categories in which false discovery rate is less than 0.01.
