# Supplementary material for: A Model-Based Approach for Identifying Signatures of Ancient Balancing Selection in Genetic Data
Source: PubMed Central journal article supplement (PMC4140648; doi:10.1371/journal.pgen.1004561), 2014-08-21
Supplement: pgen.1004561.s043.pdf [file pgen.1004561.s043.pdf]

Table S17: GO process analysis of ranked signals from YRI population using the  $T_1$  test statistic.

| Description                                                                                      | $p$ -value            | Enrichment | Genes                                                                                                                                                                                                                                                                                                                                                                                                                                                                                                                                                                                                                                                                                                                                                                                                                                                                                                                  |
|--------------------------------------------------------------------------------------------------|-----------------------|------------|------------------------------------------------------------------------------------------------------------------------------------------------------------------------------------------------------------------------------------------------------------------------------------------------------------------------------------------------------------------------------------------------------------------------------------------------------------------------------------------------------------------------------------------------------------------------------------------------------------------------------------------------------------------------------------------------------------------------------------------------------------------------------------------------------------------------------------------------------------------------------------------------------------------------|
| Interferon-gamma-mediated signaling pathway                                                      | $2.0 \times 10^{-15}$ | 110.4      | HLA-A, HLA-B, HLA-C, HLA-DPA1, HLA-DPB1, HLA-DQA1, HLA-DQB1, HLA-DRB1, HLA-DRB5                                                                                                                                                                                                                                                                                                                                                                                                                                                                                                                                                                                                                                                                                                                                                                                                                                        |
| Cellular response to interferon-gamma                                                            | $1.9 \times 10^{-14}$ | 89.2       | HLA-A, HLA-B, HLA-C, HLA-DPA1, HLA-DPB1, HLA-DQA1, HLA-DQB1, HLA-DRB1, HLA-DRB5                                                                                                                                                                                                                                                                                                                                                                                                                                                                                                                                                                                                                                                                                                                                                                                                                                        |
| Response to interferon-gamma                                                                     | $3.0 \times 10^{-14}$ | 105.1      | HLA-A, HLA-B, HLA-C, HLA-DPA1, HLA-DPB1, HLA-DQA1, HLA-DQB1, HLA-DRB5                                                                                                                                                                                                                                                                                                                                                                                                                                                                                                                                                                                                                                                                                                                                                                                                                                                  |
| Antigen processing and presentation of exogenous peptide antigen                                 | $5.6 \times 10^{-13}$ | 63.6       | HLA-A, HLA-B, HLA-C, HLA-DPA1, HLA-DPB1, HLA-DQA1, HLA-DQB1, HLA-DRB5                                                                                                                                                                                                                                                                                                                                                                                                                                                                                                                                                                                                                                                                                                                                                                                                                                                  |
| Antigen processing and presentation of exogenous antigen                                         | $6.7 \times 10^{-13}$ | 62.8       | HLA-A, HLA-B, HLA-C, HLA-DPA1, HLA-DPB1, HLA-DQA1, HLA-DQB1, HLA-DRB5                                                                                                                                                                                                                                                                                                                                                                                                                                                                                                                                                                                                                                                                                                                                                                                                                                                  |
| Antigen processing and presentation of peptide antigen                                           | $1.1 \times 10^{-12}$ | 59.4       | HLA-A, HLA-B, HLA-C, HLA-DPA1, HLA-DPB1, HLA-DQA1, HLA-DQB1, HLA-DRB5                                                                                                                                                                                                                                                                                                                                                                                                                                                                                                                                                                                                                                                                                                                                                                                                                                                  |
| Antigen processing and presentation                                                              | $3.2 \times 10^{-12}$ | 52.0       | HLA-A, HLA-B, HLA-C, HLA-DPA1, HLA-DPB1, HLA-DQA1, HLA-DQB1, HLA-DRB5                                                                                                                                                                                                                                                                                                                                                                                                                                                                                                                                                                                                                                                                                                                                                                                                                                                  |
| Cytokine-mediated signaling pathway                                                              | $8.8 \times 10^{-11}$ | 35.0       | HLA-A, HLA-B, HLA-C, HLA-DPA1, HLA-DPB1, HLA-DQA1, HLA-DQB1, HLA-DRB5                                                                                                                                                                                                                                                                                                                                                                                                                                                                                                                                                                                                                                                                                                                                                                                                                                                  |
| Biological adhesion                                                                              | $4.4 \times 10^{-10}$ | 1.8        | ADAM12, AJAP1, AMBN, AMTN, BMPR1B, CADM2, CD84, CDH10, CDH13, CDH18, CDH23, CDH4, CDH7, CDH9, CDHR2, CDON, CDSN, CELSR1, CELSR2, CFDP1, CHL1, CLCA2, CLDN10, CLDN14, CLDN23, CLSTN2, CNTN1, CNTN3, CNTN4, CNTN5, CNTN6, CNTNAP2, CNTNAP4, CNTNAP5, COL11A1, COL13A1, COL2A1, COL4A3, COL5A1, CTNNA2, CTNNA3, CTNND2, CXADR, CXCL12, DAB1, DPT, DSC1, DSC3, DSCAM, DSG1, DSG3, EMR1, EMR2, EPHA3, EPHA4, EPHB1, F5, FAT2, FAT3, FREM1, HABP2, HPSE, HSPB11, IGFBP7, IGSF5, ITGA1, ITGA10, ITGA11, ITGA8, ITGA9, ITGB3, ITGB3BP, ITGB5, ITGBL1, LAMA2, LAMA4, LAMC1, LAMC2, LOXL2, LPP, MAEA, MAG1, MTSS1, MUC16, NCAM2, NELL2, NFASC, NID2, NLGN1, NRCAM, NRXN1, NRXN3, NTM, ODZ3, OPCML, PARVA, PCDH15, PECAM1, PKD1L1, PKHD1, PKP2, PLEK, PLXNC1, PPFIBP1, PRKCA, PRKCE, PTPRD, PTPRF, PTPRM, PTPRT, RELN, ROBO2, ROR2, RPSA, SCARB1, SDK1, SELL, SEMA5A, SIRPA, SORBS1, SPOCK1, SYK, TEK, THBS2, TNN, TNR, VNN1, VWF |
| Cell adhesion                                                                                    | $4.4 \times 10^{-10}$ | 1.8        | ADAM12, AJAP1, AMBN, AMTN, BMPR1B, CADM2, CD84, CDH10, CDH13, CDH18, CDH23, CDH4, CDH7, CDH9, CDHR2, CDON, CDSN, CELSR1, CELSR2, CFDP1, CHL1, CLCA2, CLDN10, CLDN14, CLDN23, CLSTN2, CNTN1, CNTN3, CNTN4, CNTN5, CNTN6, CNTNAP2, CNTNAP4, CNTNAP5, COL11A1, COL13A1, COL2A1, COL4A3, COL5A1, CTNNA2, CTNNA3, CTNND2, CXADR, CXCL12, DAB1, DPT, DSC1, DSC3, DSCAM, DSG1, DSG3, EMR1, EMR2, EPHA3, EPHA4, EPHB1, F5, FAT2, FAT3, FREM1, HABP2, HPSE, HSPB11, IGFBP7, IGSF5, ITGA1, ITGA10, ITGA11, ITGA8, ITGA9, ITGB3, ITGB3BP, ITGB5, ITGBL1, LAMA2, LAMA4, LAMC1, LAMC2, LOXL2, LPP, MAEA, MAG1, MTSS1, MUC16, NCAM2, NELL2, NFASC, NID2, NLGN1, NRCAM, NRXN1, NRXN3, NTM, ODZ3, OPCML, PARVA, PCDH15, PECAM1, PKD1L1, PKHD1, PKP2, PLEK, PLXNC1, PPFIBP1, PRKCA, PRKCE, PTPRD, PTPRF, PTPRM, PTPRT, RELN, ROBO2, ROR2, RPSA, SCARB1, SDK1, SELL, SEMA5A, SIRPA, SORBS1, SPOCK1, SYK, TEK, THBS2, TNN, TNR, VNN1, VWF |
| Regulation of immune response                                                                    | $4.6 \times 10^{-10}$ | 14.9       | DMBT1, HLA-A, HLA-B, HLA-C, HLA-DPA1, HLA-DPB1, HLA-DQA1, HLA-DQB1, HLA-DRB1, HLA-DRB5, MAP2K3                                                                                                                                                                                                                                                                                                                                                                                                                                                                                                                                                                                                                                                                                                                                                                                                                         |
| Cellular response to cytokine stimulus                                                           | $6.6 \times 10^{-10}$ | 27.6       | HLA-A, HLA-B, HLA-C, HLA-DPA1, HLA-DPB1, HLA-DQA1, HLA-DQB1, HLA-DRB5                                                                                                                                                                                                                                                                                                                                                                                                                                                                                                                                                                                                                                                                                                                                                                                                                                                  |
| Immune response-activating signal transduction                                                   | $1.4 \times 10^{-9}$  | 28.9       | DMBT1, HLA-DPA1, HLA-DPB1, HLA-DQA1, HLA-DQB1, HLA-DRB1, HLA-DRB5, MAP2K3                                                                                                                                                                                                                                                                                                                                                                                                                                                                                                                                                                                                                                                                                                                                                                                                                                              |
| T cell costimulation                                                                             | $1.8 \times 10^{-9}$  | 76.0       | HLA-DPA1, HLA-DPB1, HLA-DQA1, HLA-DQB1, HLA-DRB1, HLA-DRB5                                                                                                                                                                                                                                                                                                                                                                                                                                                                                                                                                                                                                                                                                                                                                                                                                                                             |
| Lymphocyte costimulation                                                                         | $2.0 \times 10^{-9}$  | 74.8       | HLA-DPA1, HLA-DPB1, HLA-DQA1, HLA-DQB1, HLA-DRB1, HLA-DRB5                                                                                                                                                                                                                                                                                                                                                                                                                                                                                                                                                                                                                                                                                                                                                                                                                                                             |
| Immune response-regulating signaling pathway                                                     | $2.3 \times 10^{-9}$  | 27.0       | DMBT1, HLA-DPA1, HLA-DPB1, HLA-DQA1, HLA-DQB1, HLA-DRB1, HLA-DRB5, MAP2K3                                                                                                                                                                                                                                                                                                                                                                                                                                                                                                                                                                                                                                                                                                                                                                                                                                              |
| Response to cytokine stimulus                                                                    | $3.8 \times 10^{-9}$  | 22.2       | HLA-A, HLA-B, HLA-C, HLA-DPA1, HLA-DPB1, HLA-DQA1, HLA-DQB1, HLA-DRB5                                                                                                                                                                                                                                                                                                                                                                                                                                                                                                                                                                                                                                                                                                                                                                                                                                                  |
| T cell receptor signaling pathway                                                                | $7.2 \times 10^{-9}$  | 61.0       | HLA-DPA1, HLA-DPB1, HLA-DQA1, HLA-DQB1, HLA-DRB1, HLA-DRB5                                                                                                                                                                                                                                                                                                                                                                                                                                                                                                                                                                                                                                                                                                                                                                                                                                                             |
| Activation of immune response                                                                    | $8.0 \times 10^{-9}$  | 23.0       | DMBT1, HLA-DPA1, HLA-DPB1, HLA-DQA1, HLA-DQB1, HLA-DRB1, HLA-DRB5, MAP2K3                                                                                                                                                                                                                                                                                                                                                                                                                                                                                                                                                                                                                                                                                                                                                                                                                                              |
| Detection of bacterium                                                                           | $1.1 \times 10^{-8}$  | 237.8      | HLA-A, HLA-B, HLA-DRB1, HLA-DRB5                                                                                                                                                                                                                                                                                                                                                                                                                                                                                                                                                                                                                                                                                                                                                                                                                                                                                       |
| Antigen processing and presentation of exogenous peptide antigen via MHC class II                | $1.4 \times 10^{-8}$  | 55.2       | HLA-DPA1, HLA-DPB1, HLA-DQA1, HLA-DQB1, HLA-DRB1, HLA-DRB5                                                                                                                                                                                                                                                                                                                                                                                                                                                                                                                                                                                                                                                                                                                                                                                                                                                             |
| Antigen processing and presentation of exogenous peptide antigen via MHC class I TAP-independent | $1.5 \times 10^{-8}$  | 901.5      | HLA-A, HLA-B, HLA-C                                                                                                                                                                                                                                                                                                                                                                                                                                                                                                                                                                                                                                                                                                                                                                                                                                                                                                    |

GO categories in which false discovery rate is less than 0.01.

Table S17 continued.

| Description                                                                               | p-value              | Enrichment | Genes                                                                                                                                                                                                                                                                                                                                                                                                                                                 |
|-------------------------------------------------------------------------------------------|----------------------|------------|-------------------------------------------------------------------------------------------------------------------------------------------------------------------------------------------------------------------------------------------------------------------------------------------------------------------------------------------------------------------------------------------------------------------------------------------------------|
| Antigen processing and presentation of peptide or polysaccharide antigen via MHC class II | $1.6 \times 10^{-8}$ | 53.9       | HLA-DPA1, HLA-DPB1, HLA-DQA1, HLA-DQB1, HLA-DRB1, HLA-DRB5                                                                                                                                                                                                                                                                                                                                                                                            |
| Antigen processing and presentation of peptide antigen via MHC class II                   | $1.6 \times 10^{-8}$ | 53.9       | HLA-DPA1, HLA-DPB1, HLA-DQA1, HLA-DQB1, HLA-DRB1, HLA-DRB5                                                                                                                                                                                                                                                                                                                                                                                            |
| Antigen receptor-mediated signaling pathway                                               | $3.7 \times 10^{-8}$ | 47.3       | HLA-DPA1, HLA-DPB1, HLA-DQA1, HLA-DQB1, HLA-DRB1, HLA-DRB5                                                                                                                                                                                                                                                                                                                                                                                            |
| Immune response-activating cell surface receptor signaling pathway                        | $5.3 \times 10^{-8}$ | 44.6       | HLA-DPA1, HLA-DPB1, HLA-DQA1, HLA-DQB1, HLA-DRB1, HLA-DRB5                                                                                                                                                                                                                                                                                                                                                                                            |
| Positive regulation of immune response                                                    | $7.2 \times 10^{-8}$ | 17.6       | DMBT1, HLA-DPA1, HLA-DPB1, HLA-DQA1, HLA-DQB1, HLA-DRB1, HLA-DRB5, MAP2K3                                                                                                                                                                                                                                                                                                                                                                             |
| Immune response-regulating cell surface receptor signaling pathway                        | $9.4 \times 10^{-8}$ | 40.7       | HLA-DPA1, HLA-DPB1, HLA-DQA1, HLA-DQB1, HLA-DRB1, HLA-DRB5                                                                                                                                                                                                                                                                                                                                                                                            |
| Regulation of immune system process                                                       | $1.1 \times 10^{-7}$ | 9.0        | DMBT1, HLA-A, HLA-B, HLA-C, HLA-DPA1, HLA-DPB1, HLA-DQA1, HLA-DQB1, HLA-DRB1, HLA-DRB5, MAP2K3                                                                                                                                                                                                                                                                                                                                                        |
| Immunoglobulin production involved in immunoglobulin mediated immune response             | $1.5 \times 10^{-7}$ | 386.4      | HLA-DQB1, HLA-DRB1, HLA-DRB5                                                                                                                                                                                                                                                                                                                                                                                                                          |
| Humoral immune response mediated by circulating immunoglobulin                            | $1.5 \times 10^{-7}$ | 386.4      | HLA-DQB1, HLA-DRB1, HLA-DRB5                                                                                                                                                                                                                                                                                                                                                                                                                          |
| Detection of biotic stimulus                                                              | $1.6 \times 10^{-7}$ | 134.4      | HLA-A, HLA-B, HLA-DRB1, HLA-DRB5                                                                                                                                                                                                                                                                                                                                                                                                                      |
| Positive regulation of T cell activation                                                  | $1.8 \times 10^{-7}$ | 30.1       | HLA-DPA1, HLA-DPB1, HLA-DQA1, HLA-DQB1, HLA-DRB1, HLA-DRB5                                                                                                                                                                                                                                                                                                                                                                                            |
| Immune response                                                                           | $2.5 \times 10^{-7}$ | 9.9        | DMBT1, HLA-A, HLA-B, HLA-C, HLA-DPA1, HLA-DQA1, HLA-DQB1, HLA-DRB1, HLA-DRB5, MAP2K3                                                                                                                                                                                                                                                                                                                                                                  |
| Immunoglobulin production                                                                 | $5.1 \times 10^{-7}$ | 289.8      | HLA-DQB1, HLA-DRB1, HLA-DRB5                                                                                                                                                                                                                                                                                                                                                                                                                          |
| Positive regulation of lymphocyte activation                                              | $7.7 \times 10^{-7}$ | 24.0       | HLA-DPA1, HLA-DPB1, HLA-DQA1, HLA-DQB1, HLA-DRB1, HLA-DRB5                                                                                                                                                                                                                                                                                                                                                                                            |
| Regulation of T cell activation                                                           | $1.1 \times 10^{-6}$ | 22.5       | HLA-DPA1, HLA-DPB1, HLA-DQA1, HLA-DQB1, HLA-DRB1, HLA-DRB5                                                                                                                                                                                                                                                                                                                                                                                            |
| Positive regulation of leukocyte activation                                               | $1.3 \times 10^{-6}$ | 22.0       | HLA-DPA1, HLA-DPB1, HLA-DQA1, HLA-DQB1, HLA-DRB1, HLA-DRB5                                                                                                                                                                                                                                                                                                                                                                                            |
| Regulation of action potential                                                            | $1.4 \times 10^{-6}$ | 5.5        | ADRA1A, ANK2, ANK3, CNR2, DPP6, GRIK2, GRIN2A, KCNC2, KCNIP1, KCNMB2, KCNMB3, PKP2, RYR2, SCN9A                                                                                                                                                                                                                                                                                                                                                       |
| Regulation of ion transmembrane transporter activity                                      | $1.6 \times 10^{-6}$ | 4.0        | ANK2, ANK3, CACNG8, CAMK2D, CASQ2, CNIH3, DAPK1, JPH3, MYO5A, NEDD4, NEDD4L, NLGN1, NRXN1, PLCG2, RELN, RYR2, TESC, TRPC6, WWP2                                                                                                                                                                                                                                                                                                                       |
| Positive regulation of cell activation                                                    | $1.6 \times 10^{-6}$ | 21.2       | HLA-DPA1, HLA-DPB1, HLA-DQA1, HLA-DQB1, HLA-DRB1, HLA-DRB5                                                                                                                                                                                                                                                                                                                                                                                            |
| Regulation of transporter activity                                                        | $2.4 \times 10^{-6}$ | 3.3        | ACTN4, ANK2, ANK3, CACNG8, CAMK2D, CASQ2, CNIH3, DAPK1, JPH3, MYO5A, NDFIP2, NEDD4, NEDD4L, NLGN1, NRXN1, PLCG2, PON1, RELN, RYR2, SNCA, TESC, TRPC6, WWP2                                                                                                                                                                                                                                                                                            |
| Positive regulation of immune system process                                              | $3.0 \times 10^{-6}$ | 11.0       | DMBT1, HLA-DPA1, HLA-DPB1, HLA-DQA1, HLA-DQB1, HLA-DRB1, HLA-DRB5, MAP2K3                                                                                                                                                                                                                                                                                                                                                                             |
| Production of molecular mediator of immune response                                       | $3.2 \times 10^{-6}$ | 178.3      | HLA-DQB1, HLA-DRB1, HLA-DRB5                                                                                                                                                                                                                                                                                                                                                                                                                          |
| Axon guidance                                                                             | $3.6 \times 10^{-6}$ | 1.9        | ABLIM1, ABLIM3, ANK1, ANK2, ANK3, BMPR1B, CACNA1C, CAPI, CDH4, CHL1, CNTN1, CNTN4, CNTN6, COL2A1, COL4A1, COL4A2, COL4A3, COL4A4, COL5A1, COL9A1, CXCL12, DCC, DOCK1, DPYSL3, EFNA5, EPHA4, EPHA7, EPHB1, ETV1, EXT1, GLI2, ITGA1, ITGA9, ITGB3, KLF7, LAMA2, LAMC1, MYO10, NFASC, NRCAM, NRXN1, NRXN3, NTN4, PAK1, PLXNA4, PLXNC1, PTPRM, RAC2, RELN, ROBO2, RPS6KA2, SEMA3A, SEMA3E, SEMA5A, SH3GL2, SLIT3, SPTB, ST8SLA2, TNFR, TRPC6, UNC5D, VAV2 |
| Positive regulation of ion transmembrane transporter activity                             | $3.7 \times 10^{-6}$ | 18.9       | ANK2, ANK3, PLCG2, RELN, RYR2, TRPC6                                                                                                                                                                                                                                                                                                                                                                                                                  |
| Regulation of lymphocyte activation                                                       | $5.2 \times 10^{-6}$ | 17.4       | HLA-DPA1, HLA-DPB1, HLA-DQA1, HLA-DQB1, HLA-DRB1, HLA-DRB5                                                                                                                                                                                                                                                                                                                                                                                            |
| Regulation of transmembrane transporter activity                                          | $5.5 \times 10^{-6}$ | 3.7        | ANK2, ANK3, CACNG8, CAMK2D, CASQ2, CNIH3, DAPK1, JPH3, MYO5A, NEDD4, NEDD4L, NLGN1, NRXN1, PLCG2, RELN, RYR2, TESC, TRPC6, WWP2                                                                                                                                                                                                                                                                                                                       |
| Response to bacterium                                                                     | $5.9 \times 10^{-6}$ | 25.8       | DMBT1, HLA-A, HLA-B, HLA-DRB1, HLA-DRB5                                                                                                                                                                                                                                                                                                                                                                                                               |
| Cellular response to organic substance                                                    | $6.0 \times 10^{-6}$ | 8.9        | HLA-A, HLA-B, HLA-C, HLA-DPA1, HLA-DPB1, HLA-DQA1, HLA-DQB1, HLA-DRB5                                                                                                                                                                                                                                                                                                                                                                                 |
| Immunoglobulin mediated immune response                                                   | $7.8 \times 10^{-6}$ | 144.9      | HLA-DQB1, HLA-DRB1, HLA-DRB5                                                                                                                                                                                                                                                                                                                                                                                                                          |
| Protein localization to membrane                                                          | $8.4 \times 10^{-6}$ | 8.7        | ANK2, ANK3, CPE, DLG2, MAGI2, NLGN1, RAMP3, RELN, SCP2                                                                                                                                                                                                                                                                                                                                                                                                |
| Immune system process                                                                     | $1.1 \times 10^{-5}$ | 5.8        | DMBT1, HLA-A, HLA-B, HLA-C, HLA-DPA1, HLA-DPB1, HLA-DQA1, HLA-DQB1, HLA-DRB1, HLA-DRB5, MAP2K3                                                                                                                                                                                                                                                                                                                                                        |
| Cellular response to type I interferon                                                    | $1.3 \times 10^{-5}$ | 126.8      | HLA-A, HLA-B, HLA-C                                                                                                                                                                                                                                                                                                                                                                                                                                   |
| Type I interferon-mediated signaling pathway                                              | $1.3 \times 10^{-5}$ | 126.8      | HLA-A, HLA-B, HLA-C                                                                                                                                                                                                                                                                                                                                                                                                                                   |
| Regulation of leukocyte activation                                                        | $1.3 \times 10^{-5}$ | 15.2       | HLA-DPA1, HLA-DPB1, HLA-DQA1, HLA-DQB1, HLA-DRB1, HLA-DRB5                                                                                                                                                                                                                                                                                                                                                                                            |
| Response to type I interferon                                                             | $1.4 \times 10^{-5}$ | 124.8      | HLA-A, HLA-B, HLA-C                                                                                                                                                                                                                                                                                                                                                                                                                                   |
| Regulation of Rho protein signal transduction                                             | $1.6 \times 10^{-5}$ | 3.1        | ABCA1, ADRA1A, ARAP3, ARHGEF18, ARHGEF37, ARHGEF4, DLC1, ECT2L, FARP1, FLOT1, KALRN, KANK1, MCF2L2, PLEKHG1, RASGRF2, SPATA13, TIAM1, TIAM2, TNEAIP1, VAV2, VAV3                                                                                                                                                                                                                                                                                      |
| B cell mediated immunity                                                                  | $1.6 \times 10^{-5}$ | 115.9      | HLA-DQB1, HLA-DRB1, HLA-DRB5                                                                                                                                                                                                                                                                                                                                                                                                                          |

GO categories in which false discovery rate is less than 0.01.

Table S17 continued.

| Description                                                                                    | p-value              | Enrichment | Genes                                                                                                                                                                                                                                                                                                                                                                                                                                                                                                                                   |
|------------------------------------------------------------------------------------------------|----------------------|------------|-----------------------------------------------------------------------------------------------------------------------------------------------------------------------------------------------------------------------------------------------------------------------------------------------------------------------------------------------------------------------------------------------------------------------------------------------------------------------------------------------------------------------------------------|
| Antigen processing and presentation of exogenous peptide antigen via MHC class I TAP-dependent | $2.0 \times 10^{-5}$ | 112.7      | <i>HLA-A, HLA-B, HLA-C</i>                                                                                                                                                                                                                                                                                                                                                                                                                                                                                                              |
| Regulation of cell activation                                                                  | $2.1 \times 10^{-5}$ | 14.1       | <i>HLA-DPA1, HLA-DPB1, HLA-DQA1, HLA-DQB1, HLA-DRB1, HLA-DRB5</i>                                                                                                                                                                                                                                                                                                                                                                                                                                                                       |
| Regulation of membrane potential                                                               | $2.2 \times 10^{-5}$ | 2.7        | <i>ABCB5, ADRA1A, ANK2, ANK3, CACNA1A, CASQ2, CNR2, DPP6, GRID2, GRIK2, GRIN2A, KCNC2, KCNIP1, KCNMA1, KCNMB2, KCNMB3, NEDD4, NEDD4L, NLGN1, NRXN1, PKP2, RELN, RYR2, SCN9A, WWP2</i>                                                                                                                                                                                                                                                                                                                                                   |
| Cell projection organization                                                                   | $2.3 \times 10^{-5}$ | 1.7        | <i>ALS2, ANK3, ARHGAP26, ARHGAP42, ARHGEF4, ASAP1, CACNA1A, CDH13, CDH23, CELSR2, CHAT, CLIC5, CLMN, CNTN4, CNTNAP2, CSF1R, CTNNA2, DAB1, DCC, DFNB31, DNAH9, DNMT3, DSCAM, DYNC2H1, EPHA4, EPHB1, FAS, FGD5, FLOT1, FOPNL, GAS7, GLI2, IFT122, IFT43, IQCB1, ITGA8, KALRN, KLF7, KLHL1, LPAR3, LRRC16A, MAP2, MTSS1, MUTED, MYLK, MYO16, MYO7A, NEDD4, NRCAM, PAK1, PARVA, PCMI, PKHD1, PLEK, PLXNA4, PRKCA, PRKGI, PTK2B, PTPRM, RAC2, RELN, RSPH9, SDC2, SEMA3A, SPAG16, SPATA13, TEKT4, TMEM17, TMEM237, TNN, VAV2, VAV3, WWTR1</i> |
| Antigen processing and presentation of exogenous peptide antigen via MHC class I               | $2.4 \times 10^{-5}$ | 106.8      | <i>HLA-A, HLA-B, HLA-C</i>                                                                                                                                                                                                                                                                                                                                                                                                                                                                                                              |
| Cellular response to chemical stimulus                                                         | $2.6 \times 10^{-5}$ | 7.4        | <i>HLA-A, HLA-B, HLA-C, HLA-DPA1, HLA-DPB1, HLA-DQA1, HLA-DQB1, HLA-DRB5</i>                                                                                                                                                                                                                                                                                                                                                                                                                                                            |
| Regulation of ion transmembrane transport                                                      | $2.7 \times 10^{-5}$ | 3.0        | <i>ACTN4, ANK2, ANK3, ANO6, CACNG8, CAMK2D, CASQ2, CNH3, DAPK1, JPH3, KCNE1, MYO5A, NEDD4, NEDD4L, NLGN1, NRXN1, PLCG2, RELN, RYR2, TESC, TRPC6, WWP2</i>                                                                                                                                                                                                                                                                                                                                                                               |
| Positive regulation of transporter activity                                                    | $2.9 \times 10^{-5}$ | 14.0       | <i>ANK2, ANK3, PLCG2, RELN, RYR2, TRPC6</i>                                                                                                                                                                                                                                                                                                                                                                                                                                                                                             |
| Regulation of potassium ion transmembrane transporter activity                                 | $3.6 \times 10^{-5}$ | 13.5       | <i>ANK2, CASQ2, NEDD4, NEDD4L, WWP2</i>                                                                                                                                                                                                                                                                                                                                                                                                                                                                                                 |
| Humoral immune response                                                                        | $4.1 \times 10^{-5}$ | 37.7       | <i>DMBT1, HLA-DQB1, HLA-DRB1, HLA-DRB5</i>                                                                                                                                                                                                                                                                                                                                                                                                                                                                                              |
| Antigen processing and presentation of peptide antigen via MHC class I                         | $4.4 \times 10^{-5}$ | 88.2       | <i>HLA-A, HLA-B, HLA-C</i>                                                                                                                                                                                                                                                                                                                                                                                                                                                                                                              |
| Detection of external stimulus                                                                 | $5.2 \times 10^{-5}$ | 35.5       | <i>HLA-A, HLA-B, HLA-DRB1, HLA-DRB5</i>                                                                                                                                                                                                                                                                                                                                                                                                                                                                                                 |
| Regulation of potassium ion transport                                                          | $5.7 \times 10^{-5}$ | 4.3        | <i>ANK2, ANK3, CASQ2, DPP6, KCNE1, KCNE3, NEDD4, NEDD4L, PTK2B, STK39, WWP2</i>                                                                                                                                                                                                                                                                                                                                                                                                                                                         |
| Regulation of interleukin-10 secretion                                                         | $6.0 \times 10^{-5}$ | 309.1      | <i>HLA-DRB1, HLA-DRB5</i>                                                                                                                                                                                                                                                                                                                                                                                                                                                                                                               |
| Regulation of small GTPase mediated signal transduction                                        | $6.0 \times 10^{-5}$ | 1.9        | <i>ABCA1, ADRA1A, ALS2, ARAP1, ARAP3, ARHGAP15, ARHGAP22, ARHGAP24, ARHGAP25, ARHGAP26, ARHGAP44, ARHGAP8, ARHGEF18, ARHGEF37, ARHGEF4, BCR, BNP2, CDC42BPA, CDON, CHN2, DGKI, DLC1, ECT2L, FARP1, FLOT1, IQSEC1, KALRN, KANK1, MCF2L2, NOTCH2, NRG1, PLEKHG1, PSD3, RAC2, RASGEF1C, RASGRF2, RELN, RGL1, SPATA13, STARD13, TIAM1, TIAM2, TNFAIP1, VAV2, VAV3</i>                                                                                                                                                                       |

GO categories in which false discovery rate is less than 0.01.
