# Supplementary material for: A Model-Based Approach for Identifying Signatures of Ancient Balancing Selection in Genetic Data
Source: PubMed Central journal article supplement (PMC4140648; doi:10.1371/journal.pgen.1004561), 2014-08-21
Supplement: pgen.1004561.s044.pdf [file pgen.1004561.s044.pdf]

Table S18: GO process analysis of ranked signals from CEU population using the  $T_2$  test statistic.

| Description                                                                                      | $p$ -value            | Enrichment | Genes                                                                                                                                                                                                                                                                                                                                                                                                                                                                                                                                                                                                                                                                                                                                                                                                                                                                               |
|--------------------------------------------------------------------------------------------------|-----------------------|------------|-------------------------------------------------------------------------------------------------------------------------------------------------------------------------------------------------------------------------------------------------------------------------------------------------------------------------------------------------------------------------------------------------------------------------------------------------------------------------------------------------------------------------------------------------------------------------------------------------------------------------------------------------------------------------------------------------------------------------------------------------------------------------------------------------------------------------------------------------------------------------------------|
| Biological adhesion                                                                              | $8.8 \times 10^{-16}$ | 2.3        | ADAM12, AJAPI, AMTN, ANGPT1, BMPR1B, CADM2, CDH10, CDH13, CDH4, CDHR2, CDON, CDSN, CLDN1, CLDN10, CLDN14, CLSTN2, CNTN1, CNTN4, CNTN5, CNTNAP2, CNTNAP4, CNTNAP5, COL13A1, COL4A3, COL5A1, CTNNA2, CTNNA3, CTNND2, CXADR, CXCL12, DCHS2, DDR1, DSC1, DSCAM, DSG1, DSG3, EMR1, EPHB1, F5, FAT2, FAT3, FAT4, FER, HABP2, HPSE, IGFBP7, IGSF5, ITGA1, ITGA2, ITGB5, ITGBL1, KITLG, LAMA1, LAMA2, LAMC1, LAMC2, LOXL2, LPP, LSAMP, MEGF10, MEGF11, MTSS1, MUC16, MYH9, NCAM2, NELL2, NFASC, NID2, NRCAM, NRP1, NRXN1, NTN1, ODZ3, OPCML, PCDH15, PCDH17, PCDHA1, PCDHA10, PCDHA11, PCDHA12, PCDHA13, PCDHA2, PCDHA3, PCDHA4, PCDHA5, PCDHA6, PCDHA7, PCDHA8, PCDHA9, PCDHAC1, PKD1L1, PKHD1, PKP1, PKP2, PLEK, PLEKHA7, PRKCE, PRPH2, PTPRD, PTPRF, PTPRM, PTPRT, PTPRU, RELN, ROBO2, RPSA, SCARB1, SDK1, SELE, SEMA5A, SIRPA, SPON1, SSPO, SYK, TECTA, TEK, THBS2, TNN, TNR, VNN1, VWF |
| Cell adhesion                                                                                    | $8.8 \times 10^{-16}$ | 2.3        | ADAM12, AJAPI, AMTN, ANGPT1, BMPR1B, CADM2, CDH10, CDH13, CDH4, CDHR2, CDON, CDSN, CLDN1, CLDN10, CLDN14, CLSTN2, CNTN1, CNTN4, CNTN5, CNTNAP2, CNTNAP4, CNTNAP5, COL13A1, COL4A3, COL5A1, CTNNA2, CTNNA3, CTNND2, CXADR, CXCL12, DCHS2, DDR1, DSC1, DSCAM, DSG1, DSG3, EMR1, EPHB1, F5, FAT2, FAT3, FAT4, FER, HABP2, HPSE, IGFBP7, IGSF5, ITGA1, ITGA2, ITGB5, ITGBL1, KITLG, LAMA1, LAMA2, LAMC1, LAMC2, LOXL2, LPP, LSAMP, MEGF10, MEGF11, MTSS1, MUC16, MYH9, NCAM2, NELL2, NFASC, NID2, NRCAM, NRP1, NRXN1, NTN1, ODZ3, OPCML, PCDH15, PCDH17, PCDHA1, PCDHA10, PCDHA11, PCDHA12, PCDHA13, PCDHA2, PCDHA3, PCDHA4, PCDHA5, PCDHA6, PCDHA7, PCDHA8, PCDHA9, PCDHAC1, PKD1L1, PKHD1, PKP1, PKP2, PLEK, PLEKHA7, PRKCE, PRPH2, PTPRD, PTPRF, PTPRM, PTPRT, PTPRU, RELN, ROBO2, RPSA, SCARB1, SDK1, SELE, SEMA5A, SIRPA, SPON1, SSPO, SYK, TECTA, TEK, THBS2, TNN, TNR, VNN1, VWF |
| Cell-cell adhesion                                                                               | $8.4 \times 10^{-13}$ | 2.7        | BMPR1B, CDH10, CDH13, CDH4, CDHR2, CDSN, CLDN1, CLDN10, CLDN14, CLSTN2, CNTN4, COL13A1, CTNNA2, CTNNA3, CTNND2, CXADR, DCHS2, DSC1, DSG1, DSG3, FAT2, FAT3, FAT4, FER, IGSF5, MEGF10, MEGF11, MYH9, NCAM2, NRCAM, NRXN1, NTN1, ODZ3, PCDH15, PCDH17, PCDHA1, PCDHA10, PCDHA11, PCDHA12, PCDHA13, PCDHA2, PCDHA3, PCDHA4, PCDHA5, PCDHA6, PCDHA7, PCDHA8, PCDHA9, PCDHAC1, PKD1L1, PKHD1, PKP1, PKP2, PLEK, PLEKHA7, PTPRD, PTPRF, PTPRM, PTPRT, PTPRU, ROBO2, SELE, SYK, TEK, TNR, VNN1                                                                                                                                                                                                                                                                                                                                                                                             |
| Interferon-gamma-mediated signaling pathway                                                      | $1.8 \times 10^{-10}$ | 42.9       | HLA-A, HLA-B, HLA-C, HLA-DPA1, HLA-DPB1, HLA-DQA1, HLA-DQB1, HLA-DRB1                                                                                                                                                                                                                                                                                                                                                                                                                                                                                                                                                                                                                                                                                                                                                                                                               |
| Cellular response to interferon-gamma                                                            | $1.1 \times 10^{-9}$  | 34.7       | HLA-A, HLA-B, HLA-C, HLA-DPA1, HLA-DPB1, HLA-DQA1, HLA-DQB1, HLA-DRB1                                                                                                                                                                                                                                                                                                                                                                                                                                                                                                                                                                                                                                                                                                                                                                                                               |
| Homophilic cell adhesion                                                                         | $1.5 \times 10^{-9}$  | 4.1        | CDH10, CDH13, CDH4, CDHR2, CLSTN2, DSC1, DSG1, DSG3, FAT2, PCDH15, PCDH17, PCDHA1, PCDHA10, PCDHA11, PCDHA12, PCDHA13, PCDHA2, PCDHA3, PCDHA4, PCDHA5, PCDHA6, PCDHA7, PCDHA8, PCDHA9, PCDHAC1, PTPRM, ROBO2                                                                                                                                                                                                                                                                                                                                                                                                                                                                                                                                                                                                                                                                        |
| Response to interferon-gamma                                                                     | $5.6 \times 10^{-9}$  | 28.5       | HLA-A, HLA-B, HLA-C, HLA-DPA1, HLA-DPB1, HLA-DQA1, HLA-DQB1, HLA-DRB1                                                                                                                                                                                                                                                                                                                                                                                                                                                                                                                                                                                                                                                                                                                                                                                                               |
| Antigen processing and presentation of peptide antigen                                           | $8.3 \times 10^{-9}$  | 18.1       | ERAP1, HLA-A, HLA-B, HLA-C, HLA-DPA1, HLA-DPB1, HLA-DQA1, HLA-DQB1, HLA-DRB1                                                                                                                                                                                                                                                                                                                                                                                                                                                                                                                                                                                                                                                                                                                                                                                                        |
| Antigen processing and presentation                                                              | $2.8 \times 10^{-8}$  | 15.9       | ERAP1, HLA-A, HLA-B, HLA-C, HLA-DPA1, HLA-DPB1, HLA-DQA1, HLA-DQB1, HLA-DRB1                                                                                                                                                                                                                                                                                                                                                                                                                                                                                                                                                                                                                                                                                                                                                                                                        |
| Axon guidance                                                                                    | $5.9 \times 10^{-8}$  | 2.0        | ABLIM1, ABLIM2, ANK2, ANK3, BMPR1B, CACNA1C, CACNB2, CAPI, CDH4, CHL1, CNTN1, CNTN4, COL4A1, COL4A2, COL4A3, COL5A1, COL5A2, COL9A1, CXCL12, DCC, DOCK1, DPYSL2, EGFR, EPHA7, EPHB1, ETV1, EXT1, EZR, ITGA1, ITGA2, ITGA9, KCNQ3, KIF5C, LAMA1, LAMA2, LAMC1, MATN2, MYH11, MYH9, MYO10, NFASC, NRCAM, NRP1, NRXN1, NRXN3, NTN1, NTN4, PAK2, PLXNA4, PTPRM, RAC2, RELN, ROBO1, ROBO2, RPS6KA2, SCN3B, SEMA3A, SEMA3E, SEMA5A, SEMA6D, SH3GL2, SLIT3, SPTB, TNR, TRPC4, TRPC6, UNC5C, VAV2                                                                                                                                                                                                                                                                                                                                                                                           |
| Antigen processing and presentation of exogenous peptide antigen                                 | $9.9 \times 10^{-8}$  | 17.2       | HLA-A, HLA-B, HLA-C, HLA-DPA1, HLA-DPB1, HLA-DQA1, HLA-DQB1, HLA-DRB1                                                                                                                                                                                                                                                                                                                                                                                                                                                                                                                                                                                                                                                                                                                                                                                                               |
| Antigen processing and presentation of exogenous antigen                                         | $1.1 \times 10^{-7}$  | 17.0       | HLA-A, HLA-B, HLA-C, HLA-DPA1, HLA-DPB1, HLA-DQA1, HLA-DQB1, HLA-DRB1                                                                                                                                                                                                                                                                                                                                                                                                                                                                                                                                                                                                                                                                                                                                                                                                               |
| Protein localization to membrane                                                                 | $3.1 \times 10^{-7}$  | 9.1        | ANK2, ANK3, CACNA1A, CPE, DLG2, GRIK2, MAGI2, NRXN1, RAMP3, RELN, SCP2                                                                                                                                                                                                                                                                                                                                                                                                                                                                                                                                                                                                                                                                                                                                                                                                              |
| Antigen processing and presentation of exogenous peptide antigen via MHC class I TAP-independent | $5.2 \times 10^{-7}$  | 300.5      | HLA-A, HLA-B, HLA-C                                                                                                                                                                                                                                                                                                                                                                                                                                                                                                                                                                                                                                                                                                                                                                                                                                                                 |

GO categories in which false discovery rate is less than 0.01.

Table S18 continued.

| Description                                    | <i>p</i> -value      | Enrichment | Genes                                                                                                                                                                                                                                                                                                                                                                                                                                                                                                                                                                                                                                                                                                                                                                                                                                                                                                                                                                                                                                                               |
|------------------------------------------------|----------------------|------------|---------------------------------------------------------------------------------------------------------------------------------------------------------------------------------------------------------------------------------------------------------------------------------------------------------------------------------------------------------------------------------------------------------------------------------------------------------------------------------------------------------------------------------------------------------------------------------------------------------------------------------------------------------------------------------------------------------------------------------------------------------------------------------------------------------------------------------------------------------------------------------------------------------------------------------------------------------------------------------------------------------------------------------------------------------------------|
| Chemotaxis                                     | $1.3 \times 10^{-6}$ | 1.7        | ABLIM1, ABLIM2, ANGPT1, ANK2, ANK3, BMPR1B, CACNA1C, CACNB2, CAPI, CCL15, CCL23, CCL24, CDH4, CHL1, CMTM7, CMTM8, CNTN1, CNTN4, COL4A1, COL4A2, COL4A3, COL5A1, COL5A2, COL9A1, CXADR, CXCL11, CXCL12, DCC, DEFB1, DOCK1, DOCK2, DOCK4, EGFR, EMR2, EPHA7, EPHB1, ETV1, EZR, FER, FGF2, ITGA1, ITGA2, ITGA9, KCNQ3, KIF5C, LAMA1, LAMA2, LAMC1, MATN2, MYH11, MYH9, MYO10, NFASC, NRCAM, NRP1, NRXN1, NRXN3, NTN1, NTN4, PAK2, PDGFA, PIK3C2G, PLA2G6, PLAUR, PLD1, PLXNA4, PRKCA, PTPRM, RAC2, RELN, ROBO1, ROBO2, RPS6KA2, SCN3B, SEMA3A, SEMA3E, SEMA5A, SEMA6D, SH3GL2, SLIT3, SPTB, SYK, TNFRSF11A, TNF, TRPC4, TRPC6, UNC5C, VAV2                                                                                                                                                                                                                                                                                                                                                                                                                             |
| Taxis                                          | $1.3 \times 10^{-6}$ | 1.7        | ABLIM1, ABLIM2, ANGPT1, ANK2, ANK3, BMPR1B, CACNA1C, CACNB2, CAPI, CCL15, CCL23, CCL24, CDH4, CHL1, CMTM7, CMTM8, CNTN1, CNTN4, COL4A1, COL4A2, COL4A3, COL5A1, COL5A2, COL9A1, CXADR, CXCL11, CXCL12, DCC, DEFB1, DOCK1, DOCK2, DOCK4, EGFR, EMR2, EPHA7, EPHB1, ETV1, EZR, FER, FGF2, ITGA1, ITGA2, ITGA9, KCNQ3, KIF5C, LAMA1, LAMA2, LAMC1, MATN2, MYH11, MYH9, MYO10, NFASC, NRCAM, NRP1, NRXN1, NRXN3, NTN1, NTN4, PAK2, PDGFA, PIK3C2G, PLA2G6, PLAUR, PLD1, PLXNA4, PRKCA, PTPRM, RAC2, RELN, ROBO1, ROBO2, RPS6KA2, SCN3B, SEMA3A, SEMA3E, SEMA5A, SEMA6D, SH3GL2, SLIT3, SPTB, SYK, TNFRSF11A, TNF, TRPC4, TRPC6, UNC5C, VAV2                                                                                                                                                                                                                                                                                                                                                                                                                             |
| Locomotion                                     | $2.3 \times 10^{-6}$ | 1.5        | ABLIM1, ABLIM2, ANGPT1, ANGPT2, ANGPT4, ANK2, ANK3, ANKS1A, AVL9, B4GALT1, BMPR1B, CACNA1C, CACNB2, CAPI, CCDC40, CCL15, CCL23, CCL24, CD244, CDC42BPA, CDH13, CDH4, CHL1, CMTM7, CMTM8, CNTN1, CNTN4, COL4A1, COL4A2, COL4A3, COL5A1, COL5A2, COL9A1, CTNNA2, CXADR, CXCL11, CXCL12, DCC, DDR1, DEFB1, DISC1, DNAH5, DNAH8, DNER, DOCK1, DOCK2, DOCK4, DPYSL2, DYNC2H1, EGFR, EMR2, EPHA7, EPHB1, ERBB4, ETV1, EXT1, EZR, FAT2, FER, FGF2, GPC6, GPLD1, GRIN2A, INPP5D, INSL6, ITGA1, ITGA2, ITGA9, KCNQ3, KIAA0319, KIF5C, KIRREL3, KITLG, LAMA1, LAMA2, LAMC1, LDHC, LOXL2, LRRC16A, LRRK2, LYN, MAPT, MATN2, MYH11, MYH9, MYO10, MYO5A, NEDD4, NFASC, NKX2-3, NRCAM, NRG1, NRP1, NRXN1, NRXN3, NTN1, NTN4, OVOL2, PAK2, PAK7, PARD3, PDGFA, PIK3C2G, PLA2G6, PLAUR, PLD1, PLXNA4, PPAP2A, PRKCA, PRKG1, PTPRM, RAC2, RELN, ROBO1, ROBO2, RPS6KA2, SCARB1, SCN3B, SCNN1G, SELE, SEMA3A, SEMA3E, SEMA5A, SEMA6D, SH3GL2, SIRPA, SLC22A16, SLCTA7, SLC9C1, SLIT3, SPATA13, SPTB, SYK, TBX20, TEK, TNFRSF11A, TNN, TNF, TNS1, TRPC4, TRPC6, UNC5C, VAV2, VAV3, WWC1 |
| Cytokine-mediated signaling pathway            | $3.7 \times 10^{-6}$ | 9.2        | HLA-A, HLA-B, HLA-C, HLA-DPA1, HLA-DPB1, HLA-DQA1, HLA-DQB1, HLA-DRB1, NUP88                                                                                                                                                                                                                                                                                                                                                                                                                                                                                                                                                                                                                                                                                                                                                                                                                                                                                                                                                                                        |
| Detection of bacterium                         | $4.4 \times 10^{-6}$ | 27.3       | HLA-A, HLA-B, HLA-DRB1, HLA-DRB5, PGLYRP4                                                                                                                                                                                                                                                                                                                                                                                                                                                                                                                                                                                                                                                                                                                                                                                                                                                                                                                                                                                                                           |
| T cell costimulation                           | $6.4 \times 10^{-6}$ | 20.0       | HLA-DPA1, HLA-DPB1, HLA-DQA1, HLA-DQB1, HLA-DRA, HLA-DRB1                                                                                                                                                                                                                                                                                                                                                                                                                                                                                                                                                                                                                                                                                                                                                                                                                                                                                                                                                                                                           |
| Lymphocyte costimulation                       | $7.1 \times 10^{-6}$ | 19.6       | HLA-DPA1, HLA-DPB1, HLA-DQA1, HLA-DQB1, HLA-DRA, HLA-DRB1                                                                                                                                                                                                                                                                                                                                                                                                                                                                                                                                                                                                                                                                                                                                                                                                                                                                                                                                                                                                           |
| Regulation of immune response                  | $9.8 \times 10^{-6}$ | 7.1        | DMBT1, ERAP1, HLA-A, HLA-B, HLA-C, HLA-DPA1, HLA-DPB1, HLA-DQA1, HLA-DQB1, HLA-DRB1                                                                                                                                                                                                                                                                                                                                                                                                                                                                                                                                                                                                                                                                                                                                                                                                                                                                                                                                                                                 |
| Immune response-activating signal transduction | $2.0 \times 10^{-5}$ | 8.7        | DMBT1, HLA-DPA1, HLA-DPB1, HLA-DQA1, HLA-DQB1, HLA-DRA, HLA-DRB1, MAP2K3                                                                                                                                                                                                                                                                                                                                                                                                                                                                                                                                                                                                                                                                                                                                                                                                                                                                                                                                                                                            |

GO categories in which false discovery rate is less than 0.01.
