# Supplementary material for: A Model-Based Approach for Identifying Signatures of Ancient Balancing Selection in Genetic Data
Source: PubMed Central journal article supplement (PMC4140648; doi:10.1371/journal.pgen.1004561), 2014-08-21
Supplement: pgen.1004561.s045.pdf [file pgen.1004561.s045.pdf]

Table S19: GO process analysis of ranked signals from YRI population using the  $T_2$  test statistic.

| Description                                             | $p$ -value            | Enrichment | Genes                                                                                                                                                                                                                                                                                                                                                                                                                                                                                                                                                                                                                                                                                                                                                                                                                                                                                          |
|---------------------------------------------------------|-----------------------|------------|------------------------------------------------------------------------------------------------------------------------------------------------------------------------------------------------------------------------------------------------------------------------------------------------------------------------------------------------------------------------------------------------------------------------------------------------------------------------------------------------------------------------------------------------------------------------------------------------------------------------------------------------------------------------------------------------------------------------------------------------------------------------------------------------------------------------------------------------------------------------------------------------|
| Biological adhesion                                     | $2.9 \times 10^{-13}$ | 2.1        | ADAM12, AMTN, ANGPT1, BMPR1B, CADM2, CD84, CDH10, CDH13, CDH23, CDH4, CDH9, CDON, CDSN, CELSR2, CFDP1, CLCA2, CLDN10, CLDN14, CLDN23, CLSTN2, CNTN1, CNTN4, CNTN5, CNTN6, CNTNAP2, CNTNAP4, CNTNAP5, COL11A1, COL2A1, COL4A3, COL5A1, CTNNA2, CTNNA3, CTNND2, CYFIP2, DAB1, DCHS2, DDR2, DSC1, DSC3, DSCAM, DSG1, EMR1, EMR2, EPHA3, F5, FAT2, FAT3, GPNMB, HABP2, IGFBP7, IGSF5, ITGA1, ITGA11, ITGA2, ITGA8, ITGA9, ITGAE, ITGB3, ITGB5, ITGBL1, LAMA2, LAMA4, LAMC1, LAMC2, LOXL2, LPP, MAEA, MAG1, MTSS1, MYH9, NCAM2, NELL2, NFASC, NID2, NLGN1, NRCAM, NRXN1, NTM, ODZ3, OPCML, PARVA, PCDH15, PCDHA1, PCDHA10, PCDHA11, PCDHA12, PCDHA13, PCDHA2, PCDHA3, PCDHA4, PCDHA5, PCDHA6, PCDHA7, PCDHA8, PCDHA9, PCDHAC1, PKD1L1, PKHD1, PLEKHA7, PPFIBP1, PRKCA, PRKCE, PTPRD, PTPRM, PTPRT, RELN, ROBO2, RPSA, SCARB1, SDK1, SEMA5A, SIRPA, SMAD6, SPON1, SYK, TEK, TNN, TNR, VCL, VNN1, VWF |
| Cell adhesion                                           | $2.9 \times 10^{-13}$ | 2.1        | ADAM12, AMTN, ANGPT1, BMPR1B, CADM2, CD84, CDH10, CDH13, CDH23, CDH4, CDH9, CDON, CDSN, CELSR2, CFDP1, CLCA2, CLDN10, CLDN14, CLDN23, CLSTN2, CNTN1, CNTN4, CNTN5, CNTN6, CNTNAP2, CNTNAP4, CNTNAP5, COL11A1, COL2A1, COL4A3, COL5A1, CTNNA2, CTNNA3, CTNND2, CYFIP2, DAB1, DCHS2, DDR2, DSC1, DSC3, DSCAM, DSG1, EMR1, EMR2, EPHA3, F5, FAT2, FAT3, GPNMB, HABP2, IGFBP7, IGSF5, ITGA1, ITGA11, ITGA2, ITGA8, ITGA9, ITGAE, ITGB3, ITGB5, ITGBL1, LAMA2, LAMA4, LAMC1, LAMC2, LOXL2, LPP, MAEA, MAG1, MTSS1, MYH9, NCAM2, NELL2, NFASC, NID2, NLGN1, NRCAM, NRXN1, NTM, ODZ3, OPCML, PARVA, PCDH15, PCDHA1, PCDHA10, PCDHA11, PCDHA12, PCDHA13, PCDHA2, PCDHA3, PCDHA4, PCDHA5, PCDHA6, PCDHA7, PCDHA8, PCDHA9, PCDHAC1, PKD1L1, PKHD1, PLEKHA7, PPFIBP1, PRKCA, PRKCE, PTPRD, PTPRM, PTPRT, RELN, ROBO2, RPSA, SCARB1, SDK1, SEMA5A, SIRPA, SMAD6, SPON1, SYK, TEK, TNN, TNR, VCL, VNN1, VWF |
| Cell-cell adhesion                                      | $6.7 \times 10^{-11}$ | 2.6        | BMPR1B, CDH10, CDH13, CDH23, CDH4, CDH9, CDSN, CLDN14, CLDN23, CLSTN2, CNTN4, COL11A1, COL2A1, CTNNA2, CTNNA3, CTNND2, CYFIP2, DAB1, DCHS2, DSC1, DSC3, DSG1, FAT2, FAT3, IGSF5, ITGA8, MYH9, NCAM2, NLGN1, NRCAM, NRXN1, ODZ3, PARVA, PCDH15, PCDHA1, PCDHA10, PCDHA11, PCDHA12, PCDHA13, PCDHA2, PCDHA3, PCDHA4, PCDHA5, PCDHA6, PCDHA7, PCDHA8, PCDHA9, PCDHAC1, PKD1L1, PKHD1, PLEKHA7, PTPRD, PTPRM, PTPRT, ROBO2, SYK, TEK, TNR, VCL, VNN1                                                                                                                                                                                                                                                                                                                                                                                                                                               |
| Homophilic cell adhesion                                | $1.4 \times 10^{-8}$  | 3.1        | CD84, CDH10, CDH13, CDH23, CDH4, CDH9, CELSR2, CLSTN2, DCHS2, DSC1, DSC3, DSG1, FAT2, FAT3, ODZ3, PCDH15, PCDHA1, PCDHA10, PCDHA11, PCDHA12, PCDHA13, PCDHA2, PCDHA3, PCDHA4, PCDHA5, PCDHA6, PCDHA7, PCDHA8, PCDHA9, PCDHAC1, PTPRM, PTPRT, ROBO2                                                                                                                                                                                                                                                                                                                                                                                                                                                                                                                                                                                                                                             |
| Interferon-gamma-mediated signaling pathway             | $3.4 \times 10^{-8}$  | 13.9       | HLA-A, HLA-B, HLA-C, HLA-DPA1, HLA-DPB1, HLA-DQA1, HLA-DQA2, HLA-DQB1, HLA-DRB1, HLA-DRB5                                                                                                                                                                                                                                                                                                                                                                                                                                                                                                                                                                                                                                                                                                                                                                                                      |
| Cellular response to interferon-gamma                   | $2.9 \times 10^{-7}$  | 11.2       | HLA-A, HLA-B, HLA-C, HLA-DPA1, HLA-DPB1, HLA-DQA1, HLA-DQA2, HLA-DQB1, HLA-DRB1, HLA-DRB5                                                                                                                                                                                                                                                                                                                                                                                                                                                                                                                                                                                                                                                                                                                                                                                                      |
| Detection of bacterium                                  | $6.1 \times 10^{-7}$  | 40.0       | HLA-A, HLA-B, HLA-DRB1, HLA-DRB5, PGLYRP4                                                                                                                                                                                                                                                                                                                                                                                                                                                                                                                                                                                                                                                                                                                                                                                                                                                      |
| Axon guidance                                           | $6.8 \times 10^{-7}$  | 2.0        | ABLIM1, ABLIM3, ANK2, ANK3, BMPR1B, CACNA1C, CAP1, CAP2, CDH4, CNTN1, CNTN2, CNTN4, CNTN6, COL2A1, COL4A1, COL4A2, COL4A3, COL4A4, COL5A1, DCC, DOCK1, DPYSL2, DPYSL3, EGFR, ETV1, EXT1, ITGA1, ITGA2, ITGA9, ITGB3, LAMA1, LAMA2, LAMC1, LHX4, MYH14, MYH9, MYO10, NFASC, NRCAM, NRPI, NRXN1, NRXN3, NTN1, NTN4, PLXNA4, PTPRM, PTPRO, RELN, ROBO2, RPS6KA2, SCN3B, SEMA3A, SEMA3E, SEMA5A, SEMA6D, SH3GL2, SLIT3, SPTB, TNR, TRPC4, TRPC6, UNC5C, UNC5D, VAV2, WNT3                                                                                                                                                                                                                                                                                                                                                                                                                          |
| Regulation of small GTPase mediated signal transduction | $1.5 \times 10^{-6}$  | 2.2        | ABCA1, ADRA1A, ALS2, ARHGAP15, ARHGAP22, ARHGAP24, ARHGAP25, ARHGAP26, ARHGAP28, ARHGAP44, ARHGAP8, ARHGEF18, BCR, BNIP2, CDC42BPA, CDON, CHN2, DEPDC7, DGKI, DLC1, FAM13A, FLOT1, IQSEC1, KALRN, KANK1, MCF2L2, MYO9B, NOTCH2, PLEKHG1, PLEKHG4B, PSD3, RAPGEF4, RASGEF1C, RELN, RGL1, SPATA13, SRGAP3, STARD13, TAGAP, TIAM1, TIAM2, VAV1, VAV2, VAV3                                                                                                                                                                                                                                                                                                                                                                                                                                                                                                                                        |
| Response to interferon-gamma                            | $1.9 \times 10^{-6}$  | 9.2        | HLA-A, HLA-B, HLA-C, HLA-DPA1, HLA-DPB1, HLA-DQA1, HLA-DQA2, HLA-DQB1, HLA-DRB1, HLA-DRB5                                                                                                                                                                                                                                                                                                                                                                                                                                                                                                                                                                                                                                                                                                                                                                                                      |
| Antigen processing and presentation of peptide antigen  | $2.8 \times 10^{-6}$  | 6.2        | HLA-A, HLA-B, HLA-C, HLA-DPA1, HLA-DPB1, HLA-DQA1, HLA-DQA2, HLA-DQB1, HLA-DRB1, HLA-DRB5, MARCH1, TAP2                                                                                                                                                                                                                                                                                                                                                                                                                                                                                                                                                                                                                                                                                                                                                                                        |

GO categories in which false discovery rate is less than 0.01

Table S19 continued.

| Description                                                      | <i>p</i> -value      | Enrichment | Genes                                                                                                                                                                                                                                                                                                                                                                                             |
|------------------------------------------------------------------|----------------------|------------|---------------------------------------------------------------------------------------------------------------------------------------------------------------------------------------------------------------------------------------------------------------------------------------------------------------------------------------------------------------------------------------------------|
| Protein localization to membrane                                 | $6.0 \times 10^{-6}$ | 4.2        | ANK2, ANK3, CACNA1A, CAPN3, CPE, DLG2, FLOT1, GRIK2, MAGI2, MYO5A, NLGN1, NRXN1, RAMP3, RELN, SCN3B, SCP2                                                                                                                                                                                                                                                                                         |
| Antigen processing and presentation of exogenous peptide antigen | $1.0 \times 10^{-5}$ | 6.1        | HLA-A, HLA-B, HLA-C, HLA-DPA1, HLA-DPB1, HLA-DQA1, HLA-DQA2, HLA-DQB1, HLA-DRB1, HLA-DRB5, TAP2                                                                                                                                                                                                                                                                                                   |
| Antigen processing and presentation of exogenous antigen         | $1.1 \times 10^{-5}$ | 6.0        | HLA-A, HLA-B, HLA-C, HLA-DPA1, HLA-DPB1, HLA-DQA1, HLA-DQA2, HLA-DQB1, HLA-DRB1, HLA-DRB5, TAP2                                                                                                                                                                                                                                                                                                   |
| Regulation of cell morphogenesis                                 | $1.1 \times 10^{-5}$ | 1.9        | ARAP1, ARHGAP15, ARHGEF18, ATP10A, CACNA1A, CCL24, CDH4, CFDP1, CIT, CNTN2, DAB1, DCC, DLC1, DSCAM, EPHA3, FGD4, FGD5, FXN, GAS2, GAS7, KANK1, LIMD1, LRP8, LRRC4C, MBP, MYH14, MYH9, MYO10, NEDD4, NRCAM, NRP1, NTN1, NTRK2, NTRK3, PALM2, PALMD, PDLIM5, PDZD8, PLXNA4, PPP2CA, PTPRD, PTPRO, RELN, ROBO2, RUFY3, SEMA3A, SEMA3E, SHROOM3, TBCCD1, TIAMI, TNFR, TTC3, WDPCP, WNT3, WWTR1, XYLT1 |
| Antigen processing and presentation                              | $1.3 \times 10^{-5}$ | 5.5        | HLA-A, HLA-B, HLA-C, HLA-DPA1, HLA-DPB1, HLA-DQA1, HLA-DQA2, HLA-DQB1, HLA-DRB1, HLA-DRB5, MARCH1, TAP2                                                                                                                                                                                                                                                                                           |
| Regulation of neuron projection development                      | $1.3 \times 10^{-5}$ | 2.1        | CACNA1A, CCDC88A, CDH4, CIT, CNTN2, DAB1, DCC, DISC1, DPYSL3, DSCAM, EPHA3, FXN, HAPI, KALRN, KANK1, KIAA0319, LRP8, LRRC4C, MBP, NEDD4, NLGN1, NRCAM, NRP1, NTM, NTN1, NTRK2, NTRK3, ODZ3, PDLIM5, PLXNA4, PRKDI, PTPRD, PTPRO, RAPGEF4, RELN, ROBO2, RUFY3, SEMA3A, SERPINE2, TIAMI, TNFR, WNT3, XYLT1                                                                                          |

GO categories in which false discovery rate is less than 0.01.
