# Supplementary material for: A Model-Based Approach for Identifying Signatures of Ancient Balancing Selection in Genetic Data
Source: PubMed Central journal article supplement (PMC4140648; doi:10.1371/journal.pgen.1004561), 2014-08-21
Supplement: pgen.1004561.s046.pdf [file pgen.1004561.s046.pdf]

Table S20: GO function analysis of ranked signals from CEU population using the  $T_1$  test statistic.

| Description                        | $p$ -value            | Enrichment | Genes                                                                                                                                                                                                                                                                                                                                                                                                                                                                                                                                                                                                                                                                                                                                                                                                                                                                                                                                                                                                                                                                                                                                                                                                                                                                                                                                                                                                                                                                                                                                                                                                                                                                                                                                                                                                                                                                                                                                            |
|------------------------------------|-----------------------|------------|--------------------------------------------------------------------------------------------------------------------------------------------------------------------------------------------------------------------------------------------------------------------------------------------------------------------------------------------------------------------------------------------------------------------------------------------------------------------------------------------------------------------------------------------------------------------------------------------------------------------------------------------------------------------------------------------------------------------------------------------------------------------------------------------------------------------------------------------------------------------------------------------------------------------------------------------------------------------------------------------------------------------------------------------------------------------------------------------------------------------------------------------------------------------------------------------------------------------------------------------------------------------------------------------------------------------------------------------------------------------------------------------------------------------------------------------------------------------------------------------------------------------------------------------------------------------------------------------------------------------------------------------------------------------------------------------------------------------------------------------------------------------------------------------------------------------------------------------------------------------------------------------------------------------------------------------------|
| MHC class II receptor activity     | $8.1 \times 10^{-11}$ | 49.2       | HLA-DPA1, HLA-DQA1, HLA-DQA2, HLA-DQB1, HLA-DQB2, HLA-DRA, HLA-DRB1                                                                                                                                                                                                                                                                                                                                                                                                                                                                                                                                                                                                                                                                                                                                                                                                                                                                                                                                                                                                                                                                                                                                                                                                                                                                                                                                                                                                                                                                                                                                                                                                                                                                                                                                                                                                                                                                              |
| Phospholipid binding               | $6.2 \times 10^{-9}$  | 1.9        | ABCA1, AFAP1, AKAP13, ALS2, ANXA6, APBB1IP, ARHGAP22, ARHGAP23, ARHGAP24, ARHGAP25, ARHGAP42, ARHGEF18, ARHGEF3, ASAP1, BCR, CADPS, CADPS2, CCDC88A, CDC42BPA, DAPP1, DGKH, DNM3, DOCK10, DOK6, DYSF, ELMO1, FARP1, FGD4, FGD5, GRB10, HIP1, IQSEC1, ITPR1, ITPR2, KALRN, KIF16B, MCF2L2, MYO10, MYO1B, MYOF, NGEF, NOXO1, OSBPL3, PARD3, PCLO, PHLDB2, PIK3C2B, PLA2G4A, PLA2G4C, PLCB1, PLCG2, PLCH1, PLCL1, PLD1, PLEK, PLEKHA6, PLEKHA7, PLEKHG1, PLEKHH2, PON1, PREX1, PREX2, PSD3, PXX, RASGRF1, RASGRF2, RTKN2, SBF2, SCARB1, SGIP1, SKAP2, SNTB1, SNTG2, SNX16, SNX19, SNX24, SNX29, SNX31, SNX5, SNX7, SPATA13, STAP1, SWAP70, TEC, TIAMI, TIAM2, TULP3, VAV1, VAV2, VAV3, VNN1, ZFYVE1, ZFYVE28                                                                                                                                                                                                                                                                                                                                                                                                                                                                                                                                                                                                                                                                                                                                                                                                                                                                                                                                                                                                                                                                                                                                                                                                                                        |
| Metal ion binding                  | $2.5 \times 10^{-8}$  | 1.4        | ABO, ACSM5, ACTN1, ACTN2, ADARB2, ADCY3, ADCY5, ADCY8, ADD2, AGMAT, AKAP13, ALPL, AMDHD1, AMPD3, ANGPT2, ANXA6, APIP, APOA1BP, APP, ARSB, ARSG, ARSJ, ATP10B, ATP10D, ATP12A, ATP1A4, ATP2C2, ATP8A1, ATP8A2, ATP8B1, ATP9A, ATP9B, B4GALT1, BMPRI1, BNIP2, C1GALT1, CABP5, CABS1, CACNA1A, CACNA2D1, CACNA2D3, CADPS, CADPS2, CAPN14, CAPN8, CAPN9, CARS2, CASQ2, CCBE1, CDC42BPA, CDH10, CDH13, CDH23, CDH4, CDH9, CDHR2, CDKAL1, CLSTN2, CNOT6, COL27A1, COL5A2, COL9A1, COLEC12, CUBN, CYBRD1, CYP2C8, CYP2E1, CYP4F11, CYP4F12, CYP4F2, CYP4F3, CYP4F8, CYP4Z1, DBH, DCHS2, DDAH1, DDR1, DGKB, DGKH, DMRT1, DNER, DPYD, DSC1, DSG1, DTNA, EBF2, EFCAB11, EFCAB4B, EFEMP1, EGLN1, ELAC2, ELTD1, EMR1, EMR2, ENDOU, ENOSF1, ENPP1, EYS, F13A1, F5, FAHD1, FARS2, FAT2, FAT3, FAT4, FBN2, FBP2, FCER2, FGD4, FGD5, FHIT, FRAS1, FSCB, FSTL4, FSTL5, FTO, FXN, GALNT10, GALNT2, GALNTL6, GLRX3, GPR39, GRM7, GUCA1A, HAAO, HDAC7, HDHD2, HGD, HMGCLL1, HPCAL4, IDO2, IMPA2, INPP1, ITGA1, ITGA2, ITGA9, KALRN, KCNIP1, KCNIP4, KSR2, LEPREL1, LHPP, LOXL2, LRP1B, LTBP1, LTF, LYAR, MAN1A1, MAST4, MATN2, ME3, MGAT1, MGAT5B, MGMT, MLPH, MMP20, MOB2, MOB3B, MOXD1, MYO5A, NCALD, NCSI, NECAB2, NELLI, NELL2, NID2, NME7, NOTCH2, NOTCH4, NRP1, NRXN1, NRXN3, NUBPL, OAS1, OCM2, PADI2, PADI4, PADI6, PCDH15, PCDH17, PCDHA1, PCDHA10, PCDHA11, PCDHA12, PCDHA13, PCDHA2, PCDHA3, PCDHA4, PCDHA5, PCDHA6, PCDHA7, PCDHA8, PCDHA9, PCDHAC1, PCLO, PDE11A, PDE1A, PDE1C, PDE3A, PDE4D, PDE8B, PDSSI, PELO, PFKP, PGM2, PINK1, PKD1L2, PLA2G4A, PLA2G4E, PLCB1, PLCB4, PLCH1, PLCL1, PLCZ1, PLOD2, PLSCR1, PON1, PPA2, PRIM2, PRKCE, PRPSAP1, PRTFDC1, PRUNE2, PDXN, PDXNL, RELN, RIMS1, RIMS2, RNPEP, RPS6KA2, RYR2, RYR3, SCD5, SCN1A, SLC25A25, SLC8A1, SLIT3, SMO1, SMO2, SNCA, SPARCL1, STAC, STK32A, STK32B, SVEP1, SWAP70, SYT6, SYT9, TAF1B, TEC, TESC, THBS2, TIMP2, TKT, TNFRSF11A, TP63, TPD52, TPO, TYW1, UNC13C, VAV2, VAV3, ZFYVE28 |
| MHC class I receptor activity      | $2.8 \times 10^{-8}$  | 760.6      | HLA-A, HLA-B, HLA-C                                                                                                                                                                                                                                                                                                                                                                                                                                                                                                                                                                                                                                                                                                                                                                                                                                                                                                                                                                                                                                                                                                                                                                                                                                                                                                                                                                                                                                                                                                                                                                                                                                                                                                                                                                                                                                                                                                                              |
| Transmembrane transporter activity | $3.6 \times 10^{-8}$  | 1.6        | ABCA1, ABCA4, ABCB5, ABCC11, ABCC4, AKR1C4, ANO1, ANO2, AQP8, AQP9, ASIC2, ATP10B, ATP10D, ATP12A, ATP1A4, ATP1B3, ATP2C2, ATP5C1, ATP6V0E2, ATP6V1C2, ATP6V1G2, ATP8A1, ATP8A2, ATP8B1, ATP9A, ATP9B, BEST3, CACNA1A, CACNA2D1, CACNA2D3, CACNB2, CHRNA9, CHRNB3, CLCA2, CLCNKB, CLIC5, CNGA1, CNGA3, COX7B2, FGF2, GABRB2, GABRG3, GABRR1, GLRA3, GRIA1, GRIA4, GRID2, GRIK2, GRIK3, GRIK4, GRIN2A, GRIN2B, GRIN3A, GRM7, ITPR1, ITPR2, KCNA6, KCNAB1, KCNB2, KCNH7, KCNIP1, KCNIP4, KCNJ12, KCNJ16, KCNK10, KCNK2, KCNMB1, KCNMB2, KCNMB3, KCNQ3, KCNQ4, KCNQ5, LRRC52, MCOLN2, MRS2, NALCN, NCSI, NIPAL1, NIPAL3, NMUR2, OCA2, PEX5L, PIEZO1, PIEZO2, PKD1L2, RYR1, RYR2, RYR3, SCN10A, SCN1A, SCN3A, SCN3B, SCN9A, SCNN1G, SLC10A2, SLC12A6, SLC12A8, SLC14A1, SLC14A2, SLC15A2, SLC15A5, SLC16A14, SLC17A5, SLC19A3, SLC1A2, SLC1A6, SLC22A16, SLC22A4, SLC22A5, SLC24A4, SLC28A1, SLC2A1, SLC2A14, SLC2A9, SLC30A9, SLC31A2, SLC35D2, SLC38A4, SLC39A11, SLC39A14, SLC39A8, SLC41A3, SLC4A7, SLC5A12, SLC6A5, SLC7A7, SLC8A1, SLC8A3, SLC9A4, SLC9A8, SLC9A9, SLC9C1, SLC01B1, SLC01B3, SV2B, SV2C, TAP1, TAP2, TOMM7, TRPA1, TRPC4, TRPC6, TRPM3, ZDHHC13                                                                                                                                                                                                                                                                                                                                                                                                                                                                                                                                                                                                                                                                                                                                                                                |

GO categories in which false discovery rate is less than 0.01.

Table S20 continued.

| Description                                           | p-value              | Enrichment | Genes                                                                                                                                                                                                                                                                                                                                                                                                                                                                                                                                                                                                                                                                                                                                                                                                                                                                                                                                                                                                                                                            |
|-------------------------------------------------------|----------------------|------------|------------------------------------------------------------------------------------------------------------------------------------------------------------------------------------------------------------------------------------------------------------------------------------------------------------------------------------------------------------------------------------------------------------------------------------------------------------------------------------------------------------------------------------------------------------------------------------------------------------------------------------------------------------------------------------------------------------------------------------------------------------------------------------------------------------------------------------------------------------------------------------------------------------------------------------------------------------------------------------------------------------------------------------------------------------------|
| Calcium ion binding                                   | $2.0 \times 10^{-7}$ | 1.8        | ACTN1, ACTN2, CABP5, CABS1, CADPS, CAPN14, CAPN8, CAPN9, CASQ2, CCBE1, CDH10, CDH13, CDH23, CDH4, CDH9, CDHR2, CLSTN2, CUBN, DCHS2, DGKB, DNER, DSC1, DSG1, DTNA, EFCAB11, EFCAB4B, EFEMP1, ELTD1, EMR1, EMR2, EYS, FAT2, FAT4, FSCB, FSTL4, FSTL5, GRM7, GUCA1A, HPCAL4, KCNIP1, KCNIP4, LRP1B, LTBP1, MAN1A1, MATN2, MGMT, MMP20, MYO5A, NCALD, NELL1, NID2, NOTCH4, OCM2, PADI2, PADI4, PADI6, PCDH15, PCDH17, PCDHA1, PCDHA10, PCDHA11, PCDHA12, PCDHA13, PCDHA2, PCDHA3, PCDHA4, PCDHA5, PCDHA6, PCDHA7, PCDHA8, PCDHA9, PCDHAC1, PCLO, PKD1L2, PLCB1, PLCB4, PLCH1, PLSCR1, PONI, RYR2, RYR3, SLC25A25, SLIT3, SMOG1, SMOG2, SNCA, SPARCL1, SVEP1, SWAP70, TESC, THBS2, TPD52, TPO                                                                                                                                                                                                                                                                                                                                                                         |
| Ion gated channel activity                            | $2.5 \times 10^{-7}$ | 2.0        | ANO1, ANO2, ASIC2, CACNA1A, CACNA2D1, CACNA2D3, CACNB2, CHRNA9, CHRNB3, CLCA2, CLCNKB, CLIC5, CNGA3, FGF2, GABRB2, GABRG3, GABRR1, GLRA3, GRIA1, GRIA4, GRID2, GRIK2, GRIK3, GRIK4, GRIN2A, GRIN2B, GRIN3A, GRM7, ITPR1, ITPR2, KCNA6, KCNAB1, KCNB2, KCNH7, KCNIP1, KCNIP4, KCNJ12, KCNJ16, KCNK10, KCNK2, KCNMB1, KCNMB2, KCNMB3, KCNQ3, KCNQ4, KCNQ5, NALCN, NCS1, NMUR2, PEX5L, PIEZO1, RYR1, RYR2, RYR3, SCN10A, SCN1A, SCN3A, SCN3B, SCN9A, SCNN1G, TRPC4, TRPC6                                                                                                                                                                                                                                                                                                                                                                                                                                                                                                                                                                                           |
| Gated channel activity                                | $2.5 \times 10^{-7}$ | 2.0        | ANO1, ANO2, ASIC2, CACNA1A, CACNA2D1, CACNA2D3, CACNB2, CHRNA9, CHRNB3, CLCA2, CLCNKB, CLIC5, CNGA3, FGF2, GABRB2, GABRG3, GABRR1, GLRA3, GRIA1, GRIA4, GRID2, GRIK2, GRIK3, GRIK4, GRIN2A, GRIN2B, GRIN3A, GRM7, ITPR1, ITPR2, KCNA6, KCNAB1, KCNB2, KCNH7, KCNIP1, KCNIP4, KCNJ12, KCNJ16, KCNK10, KCNK2, KCNMB1, KCNMB2, KCNMB3, KCNQ3, KCNQ4, KCNQ5, NALCN, NCS1, NMUR2, PEX5L, PIEZO1, RYR1, RYR2, RYR3, SCN10A, SCN1A, SCN3A, SCN3B, SCN9A, SCNN1G, TRPC4, TRPC6                                                                                                                                                                                                                                                                                                                                                                                                                                                                                                                                                                                           |
| Substrate-specific transmembrane transporter activity | $2.7 \times 10^{-7}$ | 1.6        | ABCA1, AKR1C4, ANO1, ANO2, AQP8, AQP9, ASIC2, ATP10B, ATP10D, ATP12A, ATP1A4, ATP1B3, ATP2C2, ATP5C1, ATP6V0E2, ATP6V1C2, ATP8A1, ATP8A2, ATP8B1, ATP9A, ATP9B, BEST3, CACNA1A, CACNA2D1, CACNA2D3, CACNB2, CHRNA9, CHRNB3, CLCA2, CLCNKB, CLIC5, CNGA1, CNGA3, COX7B2, FGF2, GABRB2, GABRG3, GABRR1, GLRA3, GRIA1, GRIA4, GRID2, GRIK2, GRIK3, GRIK4, GRIN2A, GRIN2B, GRIN3A, GRM7, ITPR1, ITPR2, KCNA6, KCNAB1, KCNB2, KCNH7, KCNIP1, KCNIP4, KCNJ12, KCNJ16, KCNK10, KCNK2, KCNMB1, KCNMB2, KCNMB3, KCNQ3, KCNQ4, KCNQ5, LRRCS2, MCOLN2, MRS2, NALCN, NCS1, NIPAL1, NIPAL3, NMUR2, OCA2, PEX5L, PIEZO1, PIEZO2, PKD1L2, RYR1, RYR2, RYR3, SCN10A, SCN1A, SCN3A, SCN3B, SCN9A, SCNN1G, SLC10A2, SLC12A6, SLC14A1, SLC14A2, SLC15A2, SLC17A5, SLC19A3, SLC1A2, SLC1A6, SLC22A16, SLC22A4, SLC22A5, SLC28A1, SLC2A1, SLC2A14, SLC2A9, SLC30A9, SLC31A2, SLC35D2, SLC38A4, SLC39A11, SLC39A14, SLC39A8, SLC41A3, SLC4A7, SLC6A5, SLC7A7, SLC8A1, SLC8A3, SLC9A4, SLC9A8, SLC9A9, SLC9C1, SLCO1B1, SLCO1B3, TAP1, TAP2, TOMM7, TRPA1, TRPC4, TRPC6, TRPM3, ZDHHC13 |
| Rho guanyl-nucleotide exchange factor activity        | $6.4 \times 10^{-7}$ | 3.3        | AKAP13, ALS2, ARHGEF18, ARHGEF3, ARHGEF37, BCR, DOCK10, FARP1, FGD4, FGD5, KALRN, MCF2L2, NGEF, PLEKHG1, PREX1, PREX2, RASGRF1, RASGRF2, SPATA13, TIAM1, TIAM2, VAV1, VAV2, VAV3                                                                                                                                                                                                                                                                                                                                                                                                                                                                                                                                                                                                                                                                                                                                                                                                                                                                                 |
| Ion transmembrane transporter activity                | $8.3 \times 10^{-7}$ | 1.6        | ABCA1, AKR1C4, ANO1, ANO2, AQP9, ASIC2, ATP10B, ATP10D, ATP12A, ATP1A4, ATP1B3, ATP2C2, ATP5C1, ATP6V0E2, ATP6V1C2, ATP8A1, ATP8A2, ATP8B1, ATP9A, ATP9B, BEST3, CACNA1A, CACNA2D1, CACNA2D3, CACNB2, CHRNA9, CHRNB3, CLCA2, CLCNKB, CLIC5, CNGA1, CNGA3, COX7B2, FGF2, GABRB2, GABRG3, GABRR1, GLRA3, GRIA1, GRIA4, GRID2, GRIK2, GRIK3, GRIK4, GRIN2A, GRIN2B, GRIN3A, GRM7, ITPR1, ITPR2, KCNA6, KCNAB1, KCNB2, KCNH7, KCNIP1, KCNIP4, KCNJ12, KCNJ16, KCNK10, KCNK2, KCNMB1, KCNMB2, KCNMB3, KCNQ3, KCNQ4, KCNQ5, LRRCS2, MCOLN2, MRS2, NALCN, NCS1, NIPAL1, NIPAL3, NMUR2, OCA2, PEX5L, PIEZO1, PIEZO2, PKD1L2, RYR1, RYR2, RYR3, SCN10A, SCN1A, SCN3A, SCN3B, SCN9A, SCNN1G, SLC10A2, SLC12A6, SLC15A2, SLC17A5, SLC1A2, SLC1A6, SLC22A16, SLC22A4, SLC22A5, SLC28A1, SLC2A9, SLC30A9, SLC31A2, SLC38A4, SLC39A11, SLC39A14, SLC39A8, SLC41A3, SLC4A7, SLC6A5, SLC7A7, SLC8A1, SLC8A3, SLC9A4, SLC9A8, SLC9A9, SLC9C1, SLCO1B1, SLCO1B3, TRPA1, TRPC4, TRPC6, TRPM3, ZDHHC13                                                                               |
| Glutamate receptor activity                           | $2.6 \times 10^{-6}$ | 4.9        | GRIA1, GRIA4, GRID2, GRIK2, GRIK3, GRIK4, GRIN2A, GRIN2B, GRIN3A, GRM4, GRM5, GRM7, GRM8                                                                                                                                                                                                                                                                                                                                                                                                                                                                                                                                                                                                                                                                                                                                                                                                                                                                                                                                                                         |

GO categories in which false discovery rate is less than 0.01.

Table S20 continued.

| Description                                | <i>p</i> -value      | Enrichment | Genes                                                                                                                                                                                                                                                                                                                                                                                                                                                                                                                                                                                                                                                                                                                                                                                                                                                                                                                                                                                                                                                              |
|--------------------------------------------|----------------------|------------|--------------------------------------------------------------------------------------------------------------------------------------------------------------------------------------------------------------------------------------------------------------------------------------------------------------------------------------------------------------------------------------------------------------------------------------------------------------------------------------------------------------------------------------------------------------------------------------------------------------------------------------------------------------------------------------------------------------------------------------------------------------------------------------------------------------------------------------------------------------------------------------------------------------------------------------------------------------------------------------------------------------------------------------------------------------------|
| Substrate-specific channel activity        | $3.0 \times 10^{-6}$ | 1.8        | ANO1, ANO2, AQP8, AQP9, ASIC2, BEST3, CACNA1A, CACNA2D1, CACNA2D3, CACNB2, CHRNB3, CHRNA9, CHRNA9, CHRNA9, CLCA2, CLCNKB, CLIC5, CNGA1, CNGA3, FGF2, GABRB2, GABRG3, GABRR1, GLRA3, GLRA3, GRIA1, GRIA4, GRID2, GRIK2, GRIK3, GRIK4, GRIN2A, GRIN2B, GRIN3A, GRM7, ITPR1, ITPR2, KCNA6, KCNAB1, KCNB2, KCNH7, KCNIP1, KCNIP4, KCNJ12, KCNJ16, KCNK10, KCNK2, KCNMB1, KCNMB2, KCNMB3, KCNQ3, KCNQ4, KCNQ5, LRRC52, MCOLN2, NALCN, NCS1, NMUR2, PEX5L, PIEZO1, PIEZO2, PKD1L2, RYR1, RYR2, RYR3, SCN10A, SCN1A, SCN3A, SCN3B, SCN9A, SCNN1G, TRPA1, TRPC4, TRPC6, TRPM3                                                                                                                                                                                                                                                                                                                                                                                                                                                                                              |
| Ion channel activity                       | $5.0 \times 10^{-6}$ | 1.8        | ANO1, ANO2, ASIC2, BEST3, CACNA1A, CACNA2D1, CACNA2D3, CACNB2, CHRNA9, CHRNB3, CLCA2, CLCNKB, CLIC5, CNGA1, CNGA3, FGF2, GABRB2, GABRG3, GABRR1, GLRA3, GRIA1, GRIA4, GRID2, GRIK2, GRIK3, GRIK4, GRIN2A, GRIN2B, GRIN3A, GRM7, ITPR1, ITPR2, KCNA6, KCNAB1, KCNB2, KCNH7, KCNIP1, KCNIP4, KCNJ12, KCNJ16, KCNK10, KCNK2, KCNMB1, KCNMB2, KCNMB3, KCNQ3, KCNQ4, KCNQ5, LRRC52, MCOLN2, NALCN, NCS1, NMUR2, PEX5L, PIEZO1, PIEZO2, PKD1L2, RYR1, RYR2, RYR3, SCN10A, SCN1A, SCN3A, SCN3B, SCN9A, SCNN1G, TRPA1, TRPC4, TRPC6, TRPM3                                                                                                                                                                                                                                                                                                                                                                                                                                                                                                                                 |
| Receptor activity                          | $5.1 \times 10^{-6}$ | 1.5        | ABCA1, ADRA1A, ALK, ASGR2, BAIB, BMPRI1, CLEC1A, CLEC1B, CNR2, COLEC12, CUBN, DAB2, DCC, DMBT1, DNER, EFEMP1, ELTD1, EMR1, ENDOU, EPHB1, ERBB4, F2RL2, FAS, FSHR, GABRR1, GPR111, GPR139, GPR158, GPR39, GPR78, GRIA1, GRIK2, GRIK3, GRIN2A, GRIN3A, GRM5, GRM7, GRM8, HLA-A, HLA-B, HLA-C, HLA-DOA, HLA-DPA1, HLA-DQA1, HLA-DQA2, HLA-DQB1, HLA-DQB2, HLA-DRA, HLA-DRB1, HLA-F, HLA-G, IL1RL2, ITGB5, ITGBL1, KLRB1, LGR5, LHCGR, LOXL2, LRP1B, LTBP1, MCC, NOTCH4, NPSR1, NRPI, NRXN1, NRXN3, OPCML, OPRK1, OR10A1, OR10C1, OR12D2, OR13C5, OR14A16, OR1L8, OR1N2, OR1S1, OR2AK2, OR2L13, OR2T4, OR2W3, OR4C3, OR4C45, OR51B2, OR51B6, OR51E1, OR51F1, OR51I2, OR51M1, OR51Q1, OR52E2, OR52E6, OR52J3, OR52N2, OR52N4, OR52R1, OR5AC2, OR5F1, OR5I1, OR5P2, OR5W2, OR8G1, OR8G5, OR8H3, OR8I2, OR8U8, OR9G1, OR9G9, PDGFRL, PGLYRP4, PKHD1, PLA2R1, PLXNA4, PPYR1, PROKR2, PTCHD3, PTGER3, PTPRB, PTPRD, PTPRM, RAMP3, ROBO2, ROR1, RORA, RXRG, SCARB1, SEMA3A, SEMA3E, SEMA5A, SEMA6D, SORCS1, SORCS2, SORCS3, TAS2R19, TAS2R20, TEK, TMPRSS15, TNFRSF11A, TSHR |
| Passive transmembrane transporter activity | $1.3 \times 10^{-5}$ | 1.8        | ANO1, ANO2, AQP8, AQP9, ASIC2, BEST3, CACNA1A, CACNA2D1, CACNA2D3, CACNB2, CHRNA9, CHRNB3, CLCA2, CLCNKB, CLIC5, CNGA1, CNGA3, FGF2, GABRB2, GABRG3, GABRR1, GLRA3, GRIA1, GRIA4, GRID2, GRIK2, GRIK3, GRIK4, GRIN2A, GRIN2B, GRIN3A, GRM7, ITPR1, ITPR2, KCNA6, KCNAB1, KCNB2, KCNH7, KCNIP1, KCNIP4, KCNJ12, KCNJ16, KCNK10, KCNK2, KCNMB1, KCNMB2, KCNMB3, KCNQ3, KCNQ4, KCNQ5, LRRC52, MCOLN2, NALCN, NCS1, NMUR2, PEX5L, PIEZO1, PIEZO2, PKD1L2, RYR1, RYR2, RYR3, SCN10A, SCN1A, SCN3A, SCN3B, SCN9A, SCNN1G, TRPA1, TRPC4, TRPC6, TRPM3                                                                                                                                                                                                                                                                                                                                                                                                                                                                                                                     |
| Channel activity                           | $1.3 \times 10^{-5}$ | 1.8        | ANO1, ANO2, AQP8, AQP9, ASIC2, BEST3, CACNA1A, CACNA2D1, CACNA2D3, CACNB2, CHRNA9, CHRNB3, CLCA2, CLCNKB, CLIC5, CNGA1, CNGA3, FGF2, GABRB2, GABRG3, GABRR1, GLRA3, GRIA1, GRIA4, GRID2, GRIK2, GRIK3, GRIK4, GRIN2A, GRIN2B, GRIN3A, GRM7, ITPR1, ITPR2, KCNA6, KCNAB1, KCNB2, KCNH7, KCNIP1, KCNIP4, KCNJ12, KCNJ16, KCNK10, KCNK2, KCNMB1, KCNMB2, KCNMB3, KCNQ3, KCNQ4, KCNQ5, LRRC52, MCOLN2, NALCN, NCS1, NMUR2, PEX5L, PIEZO1, PIEZO2, PKD1L2, RYR1, RYR2, RYR3, SCN10A, SCN1A, SCN3A, SCN3B, SCN9A, SCNN1G, TRPA1, TRPC4, TRPC6, TRPM3                                                                                                                                                                                                                                                                                                                                                                                                                                                                                                                     |
| Lipid binding                              | $1.4 \times 10^{-5}$ | 1.6        | ABCA1, ADH4, ADH5, AFAP1, AKAP13, AKR1C2, ALS2, ANXA6, APBB1IP, ARHGAP22, ARHGAP23, ARHGAP24, ARHGAP25, ARHGAP42, ARHGEP18, ARHGEP3, ASAP1, BCR, CADPS, CADPS2, CCDC88A, CDC42BPA, DAPP1, DGKH, DNM3, DOCK10, DOK6, DYSF, ELMO1, ESRB, ESRG, FABP2, FARP1, FER, FGD4, FGD5, GRB10, HIP1, HSDL2, INSR, IQSEC1, ITPR1, ITPR2, KALRN, KIF16B, KL, LAMA1, LAMC1, LYN, MCF2L2, MYO10, MYO1B, MYOF, NGEF, OPN4, OSBPL3, PAR3, PCLO, PHLDB2, PIK3C2B, PLA2G4A, PLA2G4C, PLCB1, PLCG2, PLCH1, PLCL1, PLD1, PLEK, PLEKHA6, PLEKHA7, PLEKHG1, PLEKHH2, PONI, PREX1, PREX2, PSD3, PXX, RASGRF1, RASGRF2, RTKN2, SBF2, SCARB1, SCP2, SGIP1, SH3GL2, SKAP2, SNTB1, SNTG2, SNX16, SNX19, SNX24, SNX29, SNX31, SNX5, SNX7, SOAT1, SPATA13, STAP1, SWAP70, TEC, TIAM1, TIAM2, TULP3, UGT1A7, UGT1A8, UGT1A9, UNCI3A, VAV2, VAV3, VNN1, ZFYVE1, ZFYVE28                                                                                                                                                                                                                             |

GO categories in which false discovery rate is less than 0.01.

Table S20 continued.

| Description                                    | <i>p</i> -value      | Enrichment | Genes                                                                                                                                                                                                                                                                                                                                                                                                                                                                                                                                                                                                                                                                                                                                                                                                                                                                                                                                                                                                                                                                                                                                                                                                                                                                                                                       |
|------------------------------------------------|----------------------|------------|-----------------------------------------------------------------------------------------------------------------------------------------------------------------------------------------------------------------------------------------------------------------------------------------------------------------------------------------------------------------------------------------------------------------------------------------------------------------------------------------------------------------------------------------------------------------------------------------------------------------------------------------------------------------------------------------------------------------------------------------------------------------------------------------------------------------------------------------------------------------------------------------------------------------------------------------------------------------------------------------------------------------------------------------------------------------------------------------------------------------------------------------------------------------------------------------------------------------------------------------------------------------------------------------------------------------------------|
| Transmembrane signaling receptor activity      | $1.5 \times 10^{-5}$ | 1.5        | ABCA1, ADRA1A, AKRIC3, ALK, BAI3, BMPR1B, CLEC1A, CLEC1B, CNR2, DCC, DNER, EFEMP1, ELTD1, EMR1, EPHB1, ERBB4, F2RL2, FAS, FLT3, FSHR, FZD6, GABRR1, GPR111, GPR139, GPR158, GPR39, GPR78, GRIA1, GRID2, GRIK2, GRIK3, GRIK4, GRIN2A, GRIN3A, GRM5, GRM7, GRM8, HLA-A, HLA-B, HLA-C, HLA-DOA, HLA-DPA1, HLA-DQA1, HLA-DQA2, HLA-DQB1, HLA-DQB2, HLA-DRA, HLA-DRB1, HLA-F, HLA-G, IL1RL2, KLRB1, LGR5, LHCGR, LTBP1, NPSR1, NRP1, OPCML, OPRK1, OR10AG1, OR10C1, OR12D2, OR13C5, OR14A16, OR1L8, OR1N2, OR1S1, OR2AK2, OR2L13, OR2T4, OR2W3, OR4C3, OR4C45, OR51B2, OR51B6, OR51E1, OR51F1, OR51I2, OR51M1, OR51Q1, OR52E2, OR52E6, OR52J3, OR52N2, OR52N4, OR52R1, OR5AC2, OR5F1, OR5H1, OR5P2, OR5W2, OR8G1, OR8G5, OR8H3, OR8I2, OR8U8, OR9G1, OR9G9, PDGFRL, PLXNA4, PPYR1, PROKR2, PTCHD3, PTGER3, PTPRB, PTPRD, PTPRM, ROBO2, ROR1, ROR2, SEMA5A, SORCS1, SORCS2, SORCS3, TAS2R19, TAS2R20, TEK, TNFRSF11A, TSHR                                                                                                                                                                                                                                                                                                                                                                                                        |
| Metal ion transmembrane transporter activity   | $1.7 \times 10^{-5}$ | 1.8        | ASIC2, ATP12A, ATP1A4, ATP1B3, ATP2C2, CACNA1A, CACNA2D1, CACNA2D3, CACNB2, CHRNA9, FGF2, GRIN2A, GRIN2B, GRIN3A, GRM7, ITPR1, ITPR2, KCNA6, KCNAB1, KCNB2, KCNH7, KCNIP1, KCNIP4, KCNJ12, KCNJ16, KCNK10, KCNK2, KCNMB1, KCNMB2, KCNMB3, KCNQ3, KCNQ4, KCNQ5, MRS2, NALCN, NCS1, NIPAL1, NIPAL3, RYR1, RYR2, RYR3, SCN10A, SCN1A, SCN3A, SCN3B, SCN9A, SCNN1G, SLC10A2, SLC1A2, SLC1A6, SLC28A1, SLC31A2, SLC39A11, SLC39A14, SLC39A8, SLC4A7, SLC6A5, SLC8A1, SLC8A3, SLC9A4, SLC9A8, SLC9A9, TRPA1, TRPC4, TRPC6, TRPM3, ZDHHC13                                                                                                                                                                                                                                                                                                                                                                                                                                                                                                                                                                                                                                                                                                                                                                                         |
| Ras guanyl-nucleotide exchange factor activity | $1.9 \times 10^{-5}$ | 2.6        | AKAP13, ALS2, ARHGEF18, ARHGEF3, ARHGEF37, BCR, DOCK10, FARP1, FGD4, FGD5, KALRN, MCF2L2, NGEF, PLEKHG1, PREX1, PREX2, RAPGEF4, RASGRF1, RASGRF2, RGL1, RIN2, SBF2, SPATA13, TIAM1, TIAM2, VAV1, VAV2, VAV3                                                                                                                                                                                                                                                                                                                                                                                                                                                                                                                                                                                                                                                                                                                                                                                                                                                                                                                                                                                                                                                                                                                 |
| Signaling receptor activity                    | $2.1 \times 10^{-5}$ | 7.8        | DMBT1, HLA-A, HLA-B, HLA-C, HLA-DPA1, HLA-DQA1, HLA-DQB1, OR4C3                                                                                                                                                                                                                                                                                                                                                                                                                                                                                                                                                                                                                                                                                                                                                                                                                                                                                                                                                                                                                                                                                                                                                                                                                                                             |
| Transporter activity                           | $2.2 \times 10^{-5}$ | 1.4        | ABCA1, ABCA4, ABCB5, ABCC11, ABCC4, ABCG8, AKRIC4, ANO1, ANO2, APIS3, AQP8, AQP9, ASIC2, ATP10B, ATP10D, ATP12A, ATP1A4, ATP1B3, ATP2C2, ATP5C1, ATP6V0E2, ATP6V1C2, ATP6V1G2, ATP8A1, ATP8A2, ATP8B1, ATP9A, ATP9B, BEST3, CACNA1A, CACNA2D1, CACNA2D3, CACNB2, CHRNA9, CHRN3, CLCA2, CLCNKB, CLIC5, CNGA1, CNGA3, COX7B2, CPLX1, CUBN, FABP2, FGF2, FLVCRI, GABRB2, GABRG3, GABRR1, GLRA3, GRIA1, GRIA4, GRID2, GRIK2, GRIK3, GRIK4, GRIN2A, GRIN2B, GRIN3A, GRM7, ITPR1, ITPR2, KCNA6, KCNAB1, KCNB2, KCNH7, KCNIP1, KCNIP4, KCNJ12, KCNJ16, KCNK10, KCNK2, KCNMB1, KCNMB2, KCNMB3, KCNQ3, KCNQ4, KCNQ5, KPNA7, LRRCS2, MCOLN2, MRS2, NALCN, NCS1, NIPAL1, NIPAL3, NMUR2, NUP88, OCA2, PCLO, PEX5L, PIEZO1, PIEZO2, PKD1L2, PLSCR1, RAMP3, RYR1, RYR2, RYR3, SCARB1, SCN10A, SCN1A, SCN3A, SCN3B, SCN9A, SCNN1G, SCP2, SLC10A2, SLC12A6, SLC12A8, SLC14A1, SLC14A2, SLC15A2, SLC15A5, SLC16A14, SLC17A5, SLC19A3, SLC1A2, SLC1A6, SLC22A16, SLC22A4, SLC22A5, SLC24A4, SLC28A1, SLC2A1, SLC2A14, SLC2A9, SLC30A9, SLC31A2, SLC35D2, SLC37A1, SLC37A2, SLC38A4, SLC39A11, SLC39A14, SLC39A8, SLC41A3, SLC4A7, SLC5A12, SLC6A5, SLC7A7, SLC8A1, SLC8A3, SLC9A4, SLC9A8, SLC9A9, SLC9C1, SLCO1B1, SLCO1B3, SLCO1C1, SLCO5A1, SLCO6A1, SV2B, SV2C, SYNPR, SYT6, SYT9, TAP1, TAP2, TOMM7, TRPA1, TRPC4, TRPC6, TRPM3, ZDHHC13 |
| Signal transducer activity                     | $2.3 \times 10^{-5}$ | 5.8        | DMBT1, HLA-A, HLA-B, HLA-C, HLA-DPA1, HLA-DQA1, HLA-DQB1, HLA-DRB1, OR4C3, RGS6                                                                                                                                                                                                                                                                                                                                                                                                                                                                                                                                                                                                                                                                                                                                                                                                                                                                                                                                                                                                                                                                                                                                                                                                                                             |
| Molecular transducer activity                  | $2.3 \times 10^{-5}$ | 5.8        | DMBT1, HLA-A, HLA-B, HLA-C, HLA-DPA1, HLA-DQA1, HLA-DQB1, HLA-DRB1, OR4C3, RGS6                                                                                                                                                                                                                                                                                                                                                                                                                                                                                                                                                                                                                                                                                                                                                                                                                                                                                                                                                                                                                                                                                                                                                                                                                                             |

GO categories in which false discovery rate is less than 0.01.

Table S20 continued.

| Description                                | <i>p</i> -value      | Enrichment | Genes                                                                                                                                                                                                                                                                                                                                                                                                                                                                                                                                                                                                                                                                                                                                                                                                                                                                                                                                                                                                                                                                                                                    |
|--------------------------------------------|----------------------|------------|--------------------------------------------------------------------------------------------------------------------------------------------------------------------------------------------------------------------------------------------------------------------------------------------------------------------------------------------------------------------------------------------------------------------------------------------------------------------------------------------------------------------------------------------------------------------------------------------------------------------------------------------------------------------------------------------------------------------------------------------------------------------------------------------------------------------------------------------------------------------------------------------------------------------------------------------------------------------------------------------------------------------------------------------------------------------------------------------------------------------------|
| Substrate-specific transporter activity    | $2.6 \times 10^{-5}$ | 1.5        | ABCA1, ABCA4, ABCG8, AKR1C4, ANO1, ANO2, AP1S3, AQP8, AQP9, ASIC2, ATP10B, ATP10D, ATP12A, ATP1A4, ATP1B3, ATP2C2, ATP5C1, ATP6V0E2, ATP6V1C2, ATP8A1, ATP8A2, ATP8B1, ATP9A, ATP9B, BEST3, CACNA1A, CACNA2D1, CACNA2D3, CACNB2, CHRNA9, CHRNB3, CLCA2, CLCNKB, CLIC5, CNGA1, CNGA3, COX7B2, FABP2, FGF2, GABRB2, GABRG3, GABRR1, GLRA3, GRIA1, GRIA4, GRID2, GRIK2, GRIK3, GRIK4, GRIN2A, GRIN2B, GRIN3A, GRM7, ITPR1, ITPR2, KCNA6, KCNAB1, KCNB2, KCNH7, KCNIP1, KCNIP4, KCNJ12, KCNJ16, KCNK10, KCNK2, KCNMB1, KCNMB2, KCNMB3, KCNQ3, KCNQ4, KCNQ5, KPNA7, LRRC52, MCOLN2, MRS2, NALCN, NCSI, NIPAL1, NIPAL3, NMUR2, OCA2, PEX5L, PIEZO1, PIEZO2, PKD1L2, PLSCR1, RAMP3, RYR1, RYR2, RYR3, SCN10A, SCN1A, SCN3A, SCN3B, SCN9A, SCNN1G, SCP2, SLC10A2, SLC12A6, SLC14A1, SLC14A2, SLC15A2, SLC17A5, SLC19A3, SLC1A2, SLC1A6, SLC22A16, SLC22A4, SLC22A5, SLC28A1, SLC2A1, SLC2A14, SLC2A9, SLC30A9, SLC31A2, SLC35D2, SLC38A4, SLC39A11, SLC39A14, SLC39A8, SLC41A3, SLC4A7, SLC6A5, SLC7A7, SLC8A1, SLC8A3, SLC9A4, SLC9A8, SLC9A9, SLC9C1, SLCO1B1, SLCO1B3, TAP1, TAP2, TOMM7, TRPA1, TRPC4, TRPC6, TRPM3, ZDHHC13 |
| Phospholipid-translocating ATPase activity | $4.2 \times 10^{-5}$ | 6.2        | ABCA4, ATP10B, ATP10D, ATP8A1, ATP8A2, ATP8B1, ATP9A, ATP9B                                                                                                                                                                                                                                                                                                                                                                                                                                                                                                                                                                                                                                                                                                                                                                                                                                                                                                                                                                                                                                                              |

GO categories in which false discovery rate is less than 0.01.
