# Supplementary material for: A Model-Based Approach for Identifying Signatures of Ancient Balancing Selection in Genetic Data
Source: PubMed Central journal article supplement (PMC4140648; doi:10.1371/journal.pgen.1004561), 2014-08-21
Supplement: pgen.1004561.s052.pdf [file pgen.1004561.s052.pdf]

Table S26: GO component analysis of ranked signals from CEU population using the  $T_2$  test statistic.

| Description                                                | $p$ -value            | Enrichment | Genes                                                                                                                                                                                                                                                                                                                                                                                                                                                                                                                                                                                                                                                                                                                                                                                                                                                                                                                                                                                                                                                                                                                                                                                                                                                                                                                                                                                                                                                                                                                                                                                                                                                                                                                                                                                                                                                                                                                                                                                                                                                                                                                                                                                                                                                                                                                          |
|------------------------------------------------------------|-----------------------|------------|--------------------------------------------------------------------------------------------------------------------------------------------------------------------------------------------------------------------------------------------------------------------------------------------------------------------------------------------------------------------------------------------------------------------------------------------------------------------------------------------------------------------------------------------------------------------------------------------------------------------------------------------------------------------------------------------------------------------------------------------------------------------------------------------------------------------------------------------------------------------------------------------------------------------------------------------------------------------------------------------------------------------------------------------------------------------------------------------------------------------------------------------------------------------------------------------------------------------------------------------------------------------------------------------------------------------------------------------------------------------------------------------------------------------------------------------------------------------------------------------------------------------------------------------------------------------------------------------------------------------------------------------------------------------------------------------------------------------------------------------------------------------------------------------------------------------------------------------------------------------------------------------------------------------------------------------------------------------------------------------------------------------------------------------------------------------------------------------------------------------------------------------------------------------------------------------------------------------------------------------------------------------------------------------------------------------------------|
| Integral to luminal side of endoplasmic reticulum membrane | $2.8 \times 10^{-14}$ | 73.0       | HLA-A, HLA-B, HLA-C, HLA-DPA1, HLA-DPB1, HLA-DQA1, HLA-DQB1, HLA-DRA, HLA-DRB1                                                                                                                                                                                                                                                                                                                                                                                                                                                                                                                                                                                                                                                                                                                                                                                                                                                                                                                                                                                                                                                                                                                                                                                                                                                                                                                                                                                                                                                                                                                                                                                                                                                                                                                                                                                                                                                                                                                                                                                                                                                                                                                                                                                                                                                 |
| ER to Golgi transport vesicle membrane                     | $1.9 \times 10^{-13}$ | 60.9       | HLA-A, HLA-B, HLA-C, HLA-DPA1, HLA-DPB1, HLA-DQA1, HLA-DQB1, HLA-DRA, HLA-DRB1                                                                                                                                                                                                                                                                                                                                                                                                                                                                                                                                                                                                                                                                                                                                                                                                                                                                                                                                                                                                                                                                                                                                                                                                                                                                                                                                                                                                                                                                                                                                                                                                                                                                                                                                                                                                                                                                                                                                                                                                                                                                                                                                                                                                                                                 |
| Plasma membrane                                            | $5.7 \times 10^{-13}$ | 1.5        | ABCA1, ABCA4, ABCB5, ABCG8, ACP, ADAMI2, ADAM28, ADCY3, ADCY5, ADD2, ALDH9A1, ALPL, ANGPT1, ANGPT2, ANK2, ANK3, ANKS1B, ANO2, APBB1IP, ARHGAP24, ARHGEF18, ASAH2, ATP10D, ATP12A, ATP2B4, ATP6V0A4, ATP8A1, BAI3, BLNK, BMPR1B, BNC2, BTN3A1, BTN3A2, CACNA1A, CACNA1C, CADM2, CALN1, CAP1, CASR, CDH10, CDH13, CDH4, CDON, CHD1L, CHRM2, CHRNB3, CLDN10, CLDN14, CLEC12A, CLSTN2, CNGA3, CNR2, CNTN1, CNTN4, CNTN5, COL13A1, CPE, CSMD2, CSMD3, CUBN, CYBRD1, DCC, DCHS2, DGKH, DIO1, DISC1, DLG2, DLGAP1, DNER, DSC1, DSCAM, DSG1, DSG3, DTNA, DYM, DYNC2H1, DYSE, DYT, ELMO1, ELTD1, EMID2, ENPP1, ENPP6, ERBB4, ESYT2, F5, FABP2, FAS, FAT2, FHIT, FLVCR1, FNDC1, FRAS1, FRMPD1, FSHR, GABBR1, GABRB2, GABRG3, GABRR1, GFRAL, GPC5, GPC6, GPHN, GPR111, GPR139, GPR146, GPR158, GPR39, GRB10, GRIA1, GRID2, GRIK2, GRIN2A, GRIP1, GRIP2, GRM5, GRM8, HLA-A, HLA-B, HLA-C, HLA-DOA, HLA-DPA1, HLA-DPB1, HLA-DQA1, HLA-DQA2, HLA-DQB1, HLA-DQB2, HLA-DRA, HLA-DRB1, HLA-DRB5, HLA-G, HPS2, IGSF5, INADL, INPP5D, ITGA1, IYD, KCNAB1, KCNH7, KCNIP4, KCNJ12, KCNK2, KCNMB2, KCNMB3, KCNQ3, KCNQ5, KIRREL3, KITLG, KL, KLRB1, KNG1, LAMA2, LHCG, LPP, LRFN2, LRRC52, LSAMP, LYPD6B, MAGI2, MAPT, MARCH1, MDGA2, MPP5, MRAP2, MTUS1, MUC16, MYH9, MYO10, MYO16, MYO1B, MYOF, NBEA, NCAM2, NCSI, NEDD4, NETO1, NKAIN1, NKAIN3, NMUR2, NOTCH4, NPSR1, NRCAM, NRPI, NRXN1, NSL1, NTM, NTN4, NUP35, OPCML, OPRK1, OR10AG1, OR10C1, OR12D2, OR13C5, OR14A16, OR1N2, OR2AK2, OR2L13, OR2W3, OR4C3, OR4C45, OR51B2, OR51B6, OR51E1, OR51F1, OR51I2, OR51M1, OR52E2, OR52E6, OR52J3, OR52N4, OR5AC2, OR5F1, OR5H, OR5P2, OR5W2, OR8H3, OR8I2, OR9K2, PALM2, PCDH15, PCDH17, PCDHA12, PCDHA13, PCDHA9, PDIA6, PHLDB2, PIK3C2B, PKDREJ, PKP1, PKP2, PLA2R1, PLCG2, PLSCR1, PLXNA4, PPR1, PRKCE, PRKG1, PSD3, PTPN13, PTPRT, PTPRU, RAB31, RAMP3, RGS3, RGS6, RGS7, RIMBP2, RIMS2, RNPEP, RPSA, RTKN2, RYR2, SCARB1, SCN3B, SDF4, SELE, SEMA5A, SEMA6D, SGCG, SG CZ, SIRPA, SKAP2, SLC10A2, SLC12A6, SLC14A1, SLC14A2, SLC15A2, SLC16A14, SLC19A3, SLC1A2, SLC24A4, SLC27A6, SLC28A1, SLC28A3, SLC2A9, SLC7A7, SLC8A1, SLC9A4, SLC01B1, SLC01B3, SLC05A1, SLC06A1, SNCA, SNTG2, SPRED1, STYK1, SWAP70, SYK, TANC1, TAP1, TAP2, TEC, TECTA, TEK, TES, THSD7A, TIAM1, TPO, TRPC4, TRPC6, TSHR, TULP3, UNC13C, UNC93A, VAV2, VAV3, VNN1, WWOX |
| MHC protein complex                                        | $7.5 \times 10^{-13}$ | 53.7       | HLA-A, HLA-B, HLA-C, HLA-DPA1, HLA-DPB1, HLA-DQA1, HLA-DQB1, HLA-DRA, HLA-DRB1                                                                                                                                                                                                                                                                                                                                                                                                                                                                                                                                                                                                                                                                                                                                                                                                                                                                                                                                                                                                                                                                                                                                                                                                                                                                                                                                                                                                                                                                                                                                                                                                                                                                                                                                                                                                                                                                                                                                                                                                                                                                                                                                                                                                                                                 |
| Transport vesicle membrane                                 | $7.9 \times 10^{-13}$ | 55.3       | CPE, HLA-A, HLA-B, HLA-C, HLA-DPA1, HLA-DPB1, HLA-DQA1, HLA-DQB1, HLA-DRB1                                                                                                                                                                                                                                                                                                                                                                                                                                                                                                                                                                                                                                                                                                                                                                                                                                                                                                                                                                                                                                                                                                                                                                                                                                                                                                                                                                                                                                                                                                                                                                                                                                                                                                                                                                                                                                                                                                                                                                                                                                                                                                                                                                                                                                                     |

GO categories in which false discovery rate is less than 0.01.

Table S26 continued.

| Description           | <i>p</i> -value       | Enrichment | Genes                                                                                                                                                                                                                                                                                                                                                                                                                                                                                                                                                                                                                                                                                                                                                                                                                                                                                                                                                                                                                                                                                                                                                                                                                                                                                                                                                                                                                                                                                                                                                                                                                                                                                                                                                                                                                                                                                                                                                                                                                                                                                                                                                                                                                                                                                                                                                                                                                                                                                                                                                                                                                                                                                                                                                                                                                                                                                                                                                                                                                                                                                                                                                                                                                                                                                                                                                                                                                                                                                                                                       |
|-----------------------|-----------------------|------------|---------------------------------------------------------------------------------------------------------------------------------------------------------------------------------------------------------------------------------------------------------------------------------------------------------------------------------------------------------------------------------------------------------------------------------------------------------------------------------------------------------------------------------------------------------------------------------------------------------------------------------------------------------------------------------------------------------------------------------------------------------------------------------------------------------------------------------------------------------------------------------------------------------------------------------------------------------------------------------------------------------------------------------------------------------------------------------------------------------------------------------------------------------------------------------------------------------------------------------------------------------------------------------------------------------------------------------------------------------------------------------------------------------------------------------------------------------------------------------------------------------------------------------------------------------------------------------------------------------------------------------------------------------------------------------------------------------------------------------------------------------------------------------------------------------------------------------------------------------------------------------------------------------------------------------------------------------------------------------------------------------------------------------------------------------------------------------------------------------------------------------------------------------------------------------------------------------------------------------------------------------------------------------------------------------------------------------------------------------------------------------------------------------------------------------------------------------------------------------------------------------------------------------------------------------------------------------------------------------------------------------------------------------------------------------------------------------------------------------------------------------------------------------------------------------------------------------------------------------------------------------------------------------------------------------------------------------------------------------------------------------------------------------------------------------------------------------------------------------------------------------------------------------------------------------------------------------------------------------------------------------------------------------------------------------------------------------------------------------------------------------------------------------------------------------------------------------------------------------------------------------------------------------------------|
| Intrinsic to membrane | $1.0 \times 10^{-12}$ | 1.3        | ABCA1, ABCA13, ABCA4, ABCB5, ABCG8, ABO, ACBD5, ACPP, ADAM12, ADAM28, ADAM29, ADCY3, ADCY5, AIFM2, AJAP1, ALK, ALPL, ANK2, ART3, ASAH2, ASIC2, ASTN2, ATP10D, ATP2B4, ATP2C2, ATP6V0A4, ATP8A1, ATRNL1, BAI3, BMPR1B, BRI3BP, BTBD11, BTN3A1, BTN3A2, CACNA1A, CACNA1C, CACNA2D3, CADM2, CALN1, CASR, CDH10, CDH13, CDH4, CDHR2, CDKAL1, CDON, CHODL, CHR2, CHRNB3, CHST11, CLCNKB, CLDN1, CLDN10, CLDN14, CLEC12A, CLEC1A, CLEC1B, CLEC6A, CLSTN2, CMTM7, CMTM8, CNGA3, CNR2, CNTN1, CNTN4, CNTN5, CNTNAP2, CNTNAP4, CNTNAP5, COL13A1, COL23A1, COLEC12, CSMD1, CSMD2, CSMD3, CUX1, CXADR, CYBRD1, CYP2E1, CYP4F12, CYP4F3, CYP4Z1, DAD1, DCC, DCHS2, DDR1, DERL3, DIO1, DISP1, DNER, DPP6, DPY19L4, DSC1, DSCAM, DSG1, DSG3, DYSL, ELOVL2, ELTD1, EMR1, ENPP1, ENPP6, EPHA6, EPHA7, EPHB1, ERAP1, ERAP2, ERBB4, ESYT2, EVC, EVC2, FAM189A1, FAS, FAT2, FAT3, FAT4, FCER2, FERL1, FERL2, FERL3, FLVCR1, FMO2, FMO5, FRAS1, FRRS1, FSHR, FUT9, GABBR1, GABRB2, GABRG3, GABRR1, GALNT10, GALNT2, GALNTL4, GALNTL6, GFRAL, GPC5, GPC6, GPR111, GPR139, GPR146, GPR158, GPR39, GRID2, GRIK2, GRIK3, GRIN2A, GRM5, GRM7, GRM8, HHAT, HHLA2, HLA-A, HLA-B, HLA-C, HLA-DOA, HLA-DPA1, HLA-DPB1, HLA-DQA1, HLA-DQA2, HLA-DQB1, HLA-DQB2, HLA-DRA, HLA-DRB1, HLA-DRB5, HLA-G, HS3ST4, HS6ST3, IFI27L1, IGSF5, IL12RB2, IL1RL2, IMM2P2L, ITPR2, IYD, KCNAB1, KCNH7, KCNJ12, KCNMB2, KCNMB3, KIAA0922, KIAA1324L, KIRREL3, KITLG, KL, KLRB1, LAMP3, LAPTM4B, LGR5, LHCGR, LHFPL2, LRFN2, LRFN5, LRP1B, LRRC52, LSAMP, LYPD6B, MAN1A1, MARCH1, MARCH4, MDGA2, MEGF10, MEGF11, MGAT1, MGAT5, MGST3, MRS2, MS4A12, MUC12, MUC16, MUC22, MYOF, NAALADL2, NALCN, NCAM2, NDST3, NDUFB1, NDUFB4, NETO1, NEASC, NKAIN1, NKAIN3, NMUR1, NMUR2, NOTCH4, NPSR1, NRCAM, NRG1, NRG3, NRPI, NRXN1, NTM, OCA2, ODZ3, ODZ4, OMA1, OPCML, OPRK1, ORI0AG1, ORI0C1, ORI2D2, ORI3C5, ORI4A16, OR1L8, OR1N2, OR2AK2, OR2L13, OR2W3, OR4C3, OR4C45, OR51B2, OR51B6, OR51E1, OR51F1, OR51I2, OR51M1, OR52E2, OR52E6, OR52J3, OR52N4, OR5AC2, OR5F1, OR5I1, OR5P2, OR5W2, OR8H3, OR8I2, OR9K2, OTOP1, PCDH15, PCDH17, PCDHA1, PCDHA10, PCDHA11, PCDHA12, PCDHA13, PCDHA2, PCDHA3, PCDHA4, PCDHA5, PCDHA6, PCDHA7, PCDHA8, PCDHA9, PCDHAC1, PCNXL2, PDE3A, PGBD5, PI16, PIEZO2, PIGG, PINK1, PKD1L1, PKD1L2, PKDREJ, PKHDI, PKP2, PLA2R1, PLAUR, PLD5, FLEKHH2, PLSCR1, PLXDC2, PLXNA4, PNPLA3, PPYR1, PRPH2, PTCHD3, PTCHD4, PTPRB, PTPRD, PTPRF, PTPRM, PTPRT, PTPRU, QSOX1, RAMP3, RASAL1, RNF144B, RNF150, ROBO2, RRP12, RYR3, SCARB1, SCD5, SCN3B, SCNN1G, SDK1, SEC22A, SEC61B, SELE, SEMA5A, SEMA6D, SGGC, SGCZ, SIRPA, SLC10A2, SLC12A6, SLC12A8, SLC14A1, SLC14A2, SLC15A2, SLC15A5, SLC16A14, SLC17A5, SLC19A3, SLC1A2, SLC22A9, SLC24A4, SLC25A21, SLC25A25, SLC25A37, SLC27A6, SLC28A1, SLC28A3, SLC2A9, SLC30A9, SLC35B3, SLC35F3, SLC37A1, SLC38A9, SLC39A11, SLC5A12, SLC7A7, SLC8A1, SLC9A4, SLC9A9, SLC9C1, SLC01B1, SLC01B3, SLC05A1, SLC06A1, SORCS1, SORCS2, SORCS3, SPCS3, SPPL2C, SPTB, SPTLC3, SSR1, ST6GALNAC3, ST8SIA1, ST8SIA6, STEAP1B, STXBP6, STYK1, SYBU, SYNE1, SYNJ2BP, SYNPR, SYT9, TAP1, TAP2, TAS2R19, TAS2R20, TECTA, TEK, THSD7A, THSD7B, TM4SF4, TMC2, TMCC3, TMC04, TMEM106B, TMEM117, TMEM128, TMEM132B, TMEM132C, TMEM132D, TMEM156, TMEM163, TMEM17, TMEM2, TMEM220, TMEM229B, TMEM244, TMEM51, TMEM63C, TMPRSS15, TMTC1, TMTC2, TNFRSF11A, TPO, TRAM2, TRHDE, TRPA1, TRPC4, TRPC6, TRPM3, TSHR, TSPAN9, UGT2A1, UGT2B7, UNC5C, UNC80, UNC93A, UST, VNN1, VOPPI, VSTM2B, WBSCR17, WDR11, XKR6, XXYLT1, XYLT1, YIPF1, ZDHHC14, ZDHHC7 |

GO categories in which false discovery rate is less than 0.01.

Table S26 continued.

| Description   | <i>p</i> -value       | Enrichment | Genes                                                                                                                                                                                                                                                                                                                                                                                                                                                                                                                                                                                                                                                                                                                                                                                                                                                                                                                                                                                                                                                                                                                                                                                                                                                                                                                                                                                                                                                                                                                                                                                                                                                                                                                                                                                                                                                                                                                                                                                                                                                                                                                                                                                                                                                                                                                                                                                                                                                                                                                                                                                                                                                                                                                                                                                                                                                                                                                                                                                                                                                                                                                                                                                                                                                                                                                                                                                                                                                                                                                                                                                                                                                                                                                                                                                                                                                                                                                                                                                                                                                                                                           |
|---------------|-----------------------|------------|-----------------------------------------------------------------------------------------------------------------------------------------------------------------------------------------------------------------------------------------------------------------------------------------------------------------------------------------------------------------------------------------------------------------------------------------------------------------------------------------------------------------------------------------------------------------------------------------------------------------------------------------------------------------------------------------------------------------------------------------------------------------------------------------------------------------------------------------------------------------------------------------------------------------------------------------------------------------------------------------------------------------------------------------------------------------------------------------------------------------------------------------------------------------------------------------------------------------------------------------------------------------------------------------------------------------------------------------------------------------------------------------------------------------------------------------------------------------------------------------------------------------------------------------------------------------------------------------------------------------------------------------------------------------------------------------------------------------------------------------------------------------------------------------------------------------------------------------------------------------------------------------------------------------------------------------------------------------------------------------------------------------------------------------------------------------------------------------------------------------------------------------------------------------------------------------------------------------------------------------------------------------------------------------------------------------------------------------------------------------------------------------------------------------------------------------------------------------------------------------------------------------------------------------------------------------------------------------------------------------------------------------------------------------------------------------------------------------------------------------------------------------------------------------------------------------------------------------------------------------------------------------------------------------------------------------------------------------------------------------------------------------------------------------------------------------------------------------------------------------------------------------------------------------------------------------------------------------------------------------------------------------------------------------------------------------------------------------------------------------------------------------------------------------------------------------------------------------------------------------------------------------------------------------------------------------------------------------------------------------------------------------------------------------------------------------------------------------------------------------------------------------------------------------------------------------------------------------------------------------------------------------------------------------------------------------------------------------------------------------------------------------------------------------------------------------------------------------------------------------|
| Membrane part | $1.9 \times 10^{-12}$ | 1.3        | ABCA1, ABCA13, ABCA4, ABCB5, ABCG8, ABO, ACBD5, ACPP, ADAM12, ADAM28, ADAM29, ADCY3, ADCY5, AIFM2, AJAP1, AKAP6, ALK, ALPL, ANGPT1, ANK2, ANK3, ANO2, ANO3, ARHGEF4, ART3, ASAH2, ASIC2, ASTN2, ATP10D, ATP12A, ATP2B4, ATP2C2, ATP6V0A4, ATP8A1, ATRNL1, BAI3, BBS9, BMPR1B, BRI3BP, BTBD11, BTN3A1, BTN3A2, C8A, CACNA1A, CACNA1C, CACNA2D3, CADM2, CALN1, CAMK2D, CASQ2, CASR, CATSPERB, CDH10, CDH13, CDH4, CDHR2, CDKALI, CDON, CHODL, CHRM2, CHRN3, CHST11, CLCNKB, CLDN1, CLDN10, CLDN14, CLEC12A, CLEC1A, CLEC1B, CLEC6A, CLSTN2, CMTM7, CMTM8, CNGA3, CNR2, CNTN1, CNTN4, CNTN5, CNTNAP2, CNTNAP4, CNTNAP5, COL13A1, COL23A1, COLEC12, CSMD1, CSMD2, CSMD3, CTNNA2, CUBN, CUX1, CXADR, CXCL12, CYBRD1, CYP2E1, CYP4F11, CYP4F12, CYP4F2, CYP4F3, CYP4Z1, DAB2, DAD1, DCC, DCHS2, DDR1, DERL3, DIO1, DISP1, DLC1, DMBT1, DNER, DPP6, DPY19L4, DSCI, DSCAM, DSG1, DSG3, DYSF, ELOVL2, ELTD1, EMR1, ENPPI, ENPP6, EPHA6, EPHA7, EPHB1, ERAP1, ERAP2, ERBB4, ERO1LB, ESYT2, EVC, EVC2, FAM163A, FAM189A1, FAS, FAT2, FAT3, FAT4, FCER2, FER, FER1L6, FGD5, FLT3, FLVCR1, FMO2, FMO5, FRAS1, FRRS1, FSHR, FUT9, GABBR1, GABRB2, GABRG3, GABRR1, GALNT10, GALNT2, GALNTL4, GALNTL6, GFRAL, GOLM1, GPC5, GPC6, GPR111, GPR139, GPR146, GPR158, GPR39, GRIA1, GRID2, GRIK2, GRIK3, GRIN2A, GRIP1, GRM5, GRM7, GRM8, HHAT, HHLA2, HK1, HLA-A, HLA-B, HLA-C, HLA-DOA, HLA-DPA1, HLA-DPB1, HLA-DQA1, HLA-DQA2, HLA-DQB1, HLA-DQB2, HLA-DRA, HLA-DRB1, HLA-DRB5, HLA-G, HMGCLL1, HPSE, HS3ST4, HS6ST3, IFI27L1, IGSF5, IL12RB2, IL1RL2, IMMP2L, INADL, ITGA1, ITGA2, ITGB5, ITGBL1, ITPR2, IYD, KANK1, KCNA6, KCNAB1, KCNH7, KCNJ12, KCNK2, KCNMB2, KCNMB3, KCNQ3, KCNQ5, KIAA0922, KIAA1324L, KIRREL3, KITLG, KL, KLHL14, KLRB1, LAMP3, LAPTM4B, LGR5, LHCGR, LHFPL2, LRFN2, LRFN5, LRP1B, LRRC52, LSAMP, LYN, LYPD6B, MAN1A1, MARCH1, MARCH4, MDGA2, MEGF10, MEGF11, MGAT1, MGAT5, MGST3, MRS2, MS4A12, MUC12, MUC16, MUC22, MYH9, MYO10, MYOF, NAALADL2, NALCN, NAV3, NCALD, NCAM2, NDST3, NDUFA12, NDUFB1, NDUFB4, NEDD4, NETO1, NFASC, NKAIN1, NKAIN3, NMUR1, NMUR2, NOTCH4, NOXO1, NPSR1, NR-CAM, NRG1, NRG3, NRP1, NRXN1, NTM, NUP210, NUP35, NUP88, OCA2, ODZ3, ODZA, OMA1, OPCML, OPRK1, OR10AG1, OR10C1, OR12D2, OR13C5, OR14A16, OR1L8, OR1N2, OR2AK2, OR2L13, OR2W3, OR4C3, OR4C45, OR51B2, OR51B6, OR51E1, OR51F1, OR51I2, OR51M1, OR52E2, OR52E6, OR52J3, OR52N4, OR5AC2, OR5F1, OR5I1, OR5P2, OR5W2, OR8H3, ORS12, OR9K2, OTOP1, PCDH15, PCDH17, PCDHA1, PCDHA10, PCDHA11, PCDHA12, PCDHA13, PCDHA2, PCDHA3, PCDHA4, PCDHA5, PCDHA6, PCDHA7, PCDHA8, PCDHA9, PCDHAC1, PCNXL2, PCSK9, PDE3A, PDIA6, PGBD5, PI16, PIEZO2, FIGG, PINK1, PKD1L1, PKD1L2, PKDREJ, PKHD1, PKP2, PLA2G4C, PLA2R1, PLAU, PLD1, PLD5, PLEK, PLEKHH2, PLSCR1, PLXDC2, PLXNA4, PNPLA3, PPYR1, PRKAB2, PRPH2, PTCHD3, PTCHD4, PTGS1, PTPRB, PTPRD, PTPRF, PTPRM, PTPRT, PTPRU, QSOX1, RAB27A, RAMP3, RASAL1, RGS6, RGS7, RNF144B, RNF150, RNPEP, ROBO2, RRP12, RYR2, RYR3, SCARB1, SCD5, SCN3B, SCNN1G, SDHA, SDK1, SEC22A, SEC24D, SEC61B, SELE, SEMA5A, SEMA6D, SGCG, SGCZ, SHISA9, SIRPA, SLC10A2, SLC12A6, SLC12A8, SLC14A1, SLC14A2, SLC15A2, SLC15A5, SLC16A14, SLC17A5, SLC19A3, SLC1A2, SLC22A9, SLC24A4, SLC25A21, SLC25A25, SLC25A37, SLC27A6, SLC28A1, SLC28A3, SLC2A9, SLC30A9, SLC35B3, SLC35F3, SLC37A1, SLC38A9, SLC39A11, SLC5A12, SLC7A7, SLC8A1, SLC9A4, SLC9A9, SLC9C1, SLC01B1, SLC01B3, SLC05A1, SLC06A1, SNTG1, SNTG2, SNX5, SNX9, SORCS1, SORCS2, SORCS3, SPATA13, SPCS3, SPINK5, SPPL2C, SPRED1, SPTB, SPTLC3, SSR1, ST6GALNAC3, ST8SIA1, ST8SIA6, STEAP1B, STK39, STON2, STXBP6, STYK1, SYBU, SYK, SYNE1, SYNJ2BP, SYNPR, SYT9, TAP1, TAP2, TAS2R19, TAS2R20, TECTA, TEK, THSD7A, THSD7B, TM4SF4, TMC2, TMCC3, TMCO4, TMEM106B, TMEM117, TMEM128, TMEM132B, TMEM132C, TMEM132D, TMEM156, TMEM163, TMEM17, TMEM2, TMEM220, TMEM229B, TMEM244, TMEM51, TMEM63C, TMPRSS15, TMTC1, TMTC2, TNFRSF11A, TNR, TPO, TRAM2, TRHDE, TRPA1, TRPC4, TRPC6, TRPM3, TSHR, TSPAN9, UGT2A1, UGT2B7, UNC5C, UNC80, UNC93A, UST, VNN1, VOPPI, VSTM2B, VWF, WBSR17, WDR11, WWC1, XKR6, XXYLT1, XYLT1, YIPF1, ZDHC14, ZDHC7 |

GO categories in which false discovery rate is less than 0.01.

Table S26 continued.

| Description          | <i>p</i> -value       | Enrichment | Genes                                                                                                                                                                                                                                                                                                                                                                                                                                                                                                                                                                                                                                                                                                                                                                                                                                                                                                                                                                                                                                                                                                                                                                                                                                                                                                                                                                                                                                                                                                                                                                                                                                                                                                                                                                                                                                                                                                                                                                                                                                                                                                                                                                                                                                                                                                                                                                                                                                                                                                                                                                                                                                                                                                                                                                                                                                                                                                                                                                                                                                                                                                                                                                                                                                                                                                                                                                                                                                      |
|----------------------|-----------------------|------------|--------------------------------------------------------------------------------------------------------------------------------------------------------------------------------------------------------------------------------------------------------------------------------------------------------------------------------------------------------------------------------------------------------------------------------------------------------------------------------------------------------------------------------------------------------------------------------------------------------------------------------------------------------------------------------------------------------------------------------------------------------------------------------------------------------------------------------------------------------------------------------------------------------------------------------------------------------------------------------------------------------------------------------------------------------------------------------------------------------------------------------------------------------------------------------------------------------------------------------------------------------------------------------------------------------------------------------------------------------------------------------------------------------------------------------------------------------------------------------------------------------------------------------------------------------------------------------------------------------------------------------------------------------------------------------------------------------------------------------------------------------------------------------------------------------------------------------------------------------------------------------------------------------------------------------------------------------------------------------------------------------------------------------------------------------------------------------------------------------------------------------------------------------------------------------------------------------------------------------------------------------------------------------------------------------------------------------------------------------------------------------------------------------------------------------------------------------------------------------------------------------------------------------------------------------------------------------------------------------------------------------------------------------------------------------------------------------------------------------------------------------------------------------------------------------------------------------------------------------------------------------------------------------------------------------------------------------------------------------------------------------------------------------------------------------------------------------------------------------------------------------------------------------------------------------------------------------------------------------------------------------------------------------------------------------------------------------------------------------------------------------------------------------------------------------------------|
| Integral to membrane | $4.6 \times 10^{-12}$ | 1.3        | ABCA1, ABCA13, ABCA4, ABCB5, ABCG8, ABO, ACBD5, ACP, ADAM12, ADAM28, ADAM29, ADCY3, ADCY5, AIFM2, AJAP1, ALK, ALPL, ANK2, ART3, ASAH2, ASIC2, ASTN2, ATP10D, ATP2B4, ATP2C2, ATP6V0A4, ATP8A1, ATRNL1, BAI3, BMPR1B, BRI3BP, BTBD11, BTN3A1, BTN3A2, CACNA1A, CACNA1C, CACNA2D3, CADM2, CALN1, CASR, CDH10, CDH4, CDHR2, CDKAL1, CDON, CHODL, CHR2, CHRNB3, CHST11, CLCNKB, CLDN1, CLDN10, CLDN14, CLEC12A, CLEC1A, CLEC1B, CLEC6A, CLSTN2, CMTM7, CMTM8, CNGA3, CNR2, CNTNAP2, CNTNAP4, CNTNAP5, COL13A1, COL23A1, COLEC12, CSMD1, CSMD2, CSMD3, CUX1, CXADR, CYBRD1, CYP4F12, CYP4F3, CYP4Z1, DAD1, DCC, DCHS2, DDR1, DERL3, DIO1, DISP1, DNER, DPP6, DPY19L4, DSC1, DSCAM, DSG1, DSG3, DYSF, ELOVL2, ELTD1, EMRI, ENPP1, ENPP6, EPHA6, EPHA7, EPHB1, ERAP1, ERAP2, ERBB4, ESYT2, EVC, EVC2, FAMI89A1, FAS, FAT2, FAT3, FATA, FCER2, FER1L6, FLT3, FLVCR1, FMO2, FMO5, FRAS1, FRRS1, FSHR, FUT9, GABBRI, GABRB2, GABRG3, GABRR1, GALNT10, GALNT2, GALNTL4, GALNTL6, GFRAL, GPC5, GPC6, GPR111, GPR139, GPR146, GPR158, GPR39, GRID2, GRIK2, GRIK3, GRIN2A, GRM5, GRM7, GRM8, HHAT, HHLA2, HLA-A, HLA-B, HLA-C, HLA-DOA, HLA-DPA1, HLA-DPB1, HLA-DQA1, HLA-DQA2, HLA-DQB1, HLA-DQB2, HLA-DRA, HLA-DRB1, HLA-DRB5, HLA-G, HS3ST4, HS6ST3, IFI27L1, IGSF5, IL12RB2, IL1RL2, IMM2L, ITPR2, IYD, KCNAB1, KCNH7, KCNJ12, KCNM2, KCNM3, KIAA0922, KIAA1324L, KIRREL3, KITLG, KL, KLRB1, LAMP3, LAPTM4B, LGR5, LHCG3, LHFPL2, LRFN2, LRFN5, LRP1B, LRRC52, MAN1A1, MARCH1, MARCH4, MEGF10, MEGF11, MGAT1, MGAT5, MGST3, MRS2, MS4A12, MUC12, MUC16, MUC22, MYOF, NAALADL2, NALCN, NCAM2, NDST3, NDUFB1, NDUFB4, NETO1, NFASC, NKAIN1, NKAIN3, NMUR1, NMUR2, NOTCH4, NPSRI, NRCAM, NRG1, NRG3, NRP1, NRXN1, OCA2, ODZ3, ODZ4, OMA1, OPCML, OPRK1, OR10AG1, OR10C1, OR12D2, OR13C5, OR14A16, OR1L8, OR1N2, OR2AK2, OR2L13, OR2W3, OR4C3, OR4C45, OR51B2, OR51B6, OR51E1, OR51F1, OR51I2, OR51M1, OR52E2, OR52E6, OR52J3, OR52N4, OR5AC2, OR5F1, OR5I1, OR5P2, OR5W2, OR8H3, OR8I2, OR9K2, OTOP1, PCDH15, PCDH17, PCDHA1, PCDHA10, PCDHA11, PCDHA12, PCDHA13, PCDHA2, PCDHA3, PCDHA4, PCDHA5, PCDHA6, PCDHA7, PCDHA8, PCDHA9, PCDHAC1, PCNXL2, PDE3A, PGBD5, PII6, PIEZO2, PIGG, PINK1, PKDIL1, PKDIL2, PKDREJ, PKHD1, PKP2, PLA2R1, PLAUR, PLD5, PLEKHH2, PLSCR1, PLXDC2, PLXNA4, PNPLA3, PPYR1, PRPH2, PTCHD3, PTCHD4, PTPRB, PTPRD, PTPRF, PTPRM, PTPRT, PTPRU, QSOX1, RAMP3, RNF144B, RNF150, ROBO2, RRP12, RYR3, SCARB1, SCD5, SCN3B, SCNN1G, SDK1, SEC22A, SEC61B, SELE, SEMA5A, SEMA6D, SGCG, SGCZ, SIRPA, SLC10A2, SLC12A6, SLC12A8, SLC14A1, SLC14A2, SLC15A2, SLC15A5, SLC16A14, SLC17A5, SLC19A3, SLC1A2, SLC22A9, SLC24A4, SLC25A21, SLC25A25, SLC25A37, SLC27A6, SLC28A1, SLC28A3, SLC2A9, SLC30A9, SLC35B3, SLC35F3, SLC37A1, SLC38A9, SLC39A11, SLC5A12, SLC7A7, SLC8A1, SLC9A4, SLC9A9, SLC9CI, SLCO1B1, SLCO1B3, SLCO5A1, SLCO6A1, SORCS1, SORCS2, SORCS3, SPCS3, SPPL2C, SPTLC3, SSR1, ST6GALNAC3, ST8SIA1, ST8SIA6, STEAP1B, STXBP6, STYK1, SYBU, SYNE1, SYNJ2BP, SYNPR, SYT9, TAP1, TAP2, TAS2R19, TAS2R20, TEK, THSD7A, THSD7B, TM4SF4, TMC2, TMCC3, TMCO4, TMEM106B, TMEM117, TMEM128, TMEM132B, TMEM132C, TMEM132D, TMEM156, TMEM163, TMEM17, TMEM2, TMEM220, TMEM229B, TMEM244, TMEM51, TMEM63C, TMPRSS15, TMTC1, TMTC2, TNFRSF11A, TPO, TRAM2, TRHDE, TRPA1, TRPC4, TRPC6, TRPM3, TSHR, TSPAN9, UGT2A1, UGT2B7, UNC5C, UNC80, UNC93A, UST, VNN1, VOPPI, VSTM2B, WBSR17, WDR11, XKR6, XXYLT1, XYLT1, YIPF1, ZDHHC14, ZDHHC7 |
| Endocytic membrane   | $1.2 \times 10^{-11}$ | 24.8       | CUBN, DMBT1, HLA-A, HLA-B, HLA-C, HLA-DPA1, HLA-DPB1, HLA-DQA1, HLA-DQB1, HLA-DRA, HLA-DRB1                                                                                                                                                                                                                                                                                                                                                                                                                                                                                                                                                                                                                                                                                                                                                                                                                                                                                                                                                                                                                                                                                                                                                                                                                                                                                                                                                                                                                                                                                                                                                                                                                                                                                                                                                                                                                                                                                                                                                                                                                                                                                                                                                                                                                                                                                                                                                                                                                                                                                                                                                                                                                                                                                                                                                                                                                                                                                                                                                                                                                                                                                                                                                                                                                                                                                                                                                |

GO categories in which false discovery rate is less than 0.01.

Table S26 continued.

| Description                  | p-value               | Enrichment | Genes                                                                                                                                                                                                                                                                                                                                                                                                                                                                                                                                                                                                                                                                                                                                                                                                                                                                                                                                                                                                                                                                                                                                                                                                                                                                                                                                                                                                                                                                                                                                                                                                                                                                                                                                                                                                                                                                                                                                                                                                                                                                                                                                                                                                                                                                                                                                                                                                                                                                                                                                                                                                                                                                                                                                                                                                                                                                                                                                                                                                                                                                                                                                                                                                                                                                                                                                                                                                                                                                                                                                                                                                                                                                                                                                                                                                                                                                                                                                                                                                                                                                                                                                                                                                                                                                                                                                                                                                                                                                                                                                                                                                                                                                                                                                                                                                                                                                                                                                                                                                                                                                                                                                                   |
|------------------------------|-----------------------|------------|---------------------------------------------------------------------------------------------------------------------------------------------------------------------------------------------------------------------------------------------------------------------------------------------------------------------------------------------------------------------------------------------------------------------------------------------------------------------------------------------------------------------------------------------------------------------------------------------------------------------------------------------------------------------------------------------------------------------------------------------------------------------------------------------------------------------------------------------------------------------------------------------------------------------------------------------------------------------------------------------------------------------------------------------------------------------------------------------------------------------------------------------------------------------------------------------------------------------------------------------------------------------------------------------------------------------------------------------------------------------------------------------------------------------------------------------------------------------------------------------------------------------------------------------------------------------------------------------------------------------------------------------------------------------------------------------------------------------------------------------------------------------------------------------------------------------------------------------------------------------------------------------------------------------------------------------------------------------------------------------------------------------------------------------------------------------------------------------------------------------------------------------------------------------------------------------------------------------------------------------------------------------------------------------------------------------------------------------------------------------------------------------------------------------------------------------------------------------------------------------------------------------------------------------------------------------------------------------------------------------------------------------------------------------------------------------------------------------------------------------------------------------------------------------------------------------------------------------------------------------------------------------------------------------------------------------------------------------------------------------------------------------------------------------------------------------------------------------------------------------------------------------------------------------------------------------------------------------------------------------------------------------------------------------------------------------------------------------------------------------------------------------------------------------------------------------------------------------------------------------------------------------------------------------------------------------------------------------------------------------------------------------------------------------------------------------------------------------------------------------------------------------------------------------------------------------------------------------------------------------------------------------------------------------------------------------------------------------------------------------------------------------------------------------------------------------------------------------------------------------------------------------------------------------------------------------------------------------------------------------------------------------------------------------------------------------------------------------------------------------------------------------------------------------------------------------------------------------------------------------------------------------------------------------------------------------------------------------------------------------------------------------------------------------------------------------------------------------------------------------------------------------------------------------------------------------------------------------------------------------------------------------------------------------------------------------------------------------------------------------------------------------------------------------------------------------------------------------------------------------------------------------------------|
| Membrane                     | $3.0 \times 10^{-11}$ | 1.2        | ABCA1, ABCA4, ABCB5, ABCC11, ABCC4, ABCG8, ABO, ACACB, ACBD5, ACER1, ACPP, ACSBG2, ACSL1, ADAM12, ADAM28, ADCY3, ADCY5, ADD2, ADORA3, AFAP1L2, AIFM2, AKAP12, AKAP6, ALDH9A1, ALPL, ALS2, AMPH, ANGPT1, ANGPT2, ANK2, ANK3, ANKS1B, ANO2, ANTXR2, AP1S3, AP3B1, APBA2, APBB1IP, APBB2, APP, AQP8, AQP9, ARHGAP24, ARHGEF18, ASAH2, ASAP1, ATP10B, ATP10D, ATP12A, ATP2A3, ATP2B4, ATP2C2, ATP6V0A4, ATP6V1D, ATP8A1, ATP8B1, AVEN, B4GALTL1, BAI3, BBS9, BCL2L14, BCR, BICD1, BLNK, BMPRI1B, BNC2, BRI3BP, BSPRY, BTN3A1, BTN3A2, C3, C8A, CACNA1A, CACNA1C, CACNB2, CADM2, CADPS, CADPS2, CALN1, CAMK2D, CAPI, CASQ2, CASR, CBFA2T3, CD244, CD52, CDH10, CDH12, CDH13, CDH18, CDH4, CDH9, CDKAL1, CDON, CHD1L, CHL1, CHN2, CHRM2, CHRN3, CHST11, CLCN6, CLDN10, CLDN14, CLDN16, CLDN23, CLEC12A, CLSTN2, CNGA3, CNR2, CNTN1, CNTN2, CNTN4, CNTN5, CNTNAP2, COG5, COG6, COL13A1, COL23A1, CORO2B, COX16, CPAMD8, CPE, CRYM, CSMD2, CSMD3, CUBN, CUX1, CXADR, CYB5R2, CYBRD1, CYP2E1, CYP4F11, CYP4F12, CYP4F2, CYP4F3, CYP4F8, CYP4Z1, DAAMI, DAB2, DAD1, DCC, DCHS2, DGKB, DGKH, DIO1, DISC1, DLG2, DLGAP1, DMBT1, DNAAF1, DNER, DNML1, DOCK1, DOCK2, DOCK4, DOPEY2, DRAM1, DSCI, DSCAM, DSG1, DSG3, DTNA, DYM, DYNC2H1, DYSF, DYT1, EGFR, ELMO1, ELOVL2, ELOVL6, ELOVL7, ELTD1, EMCN, EMID2, EMR2, ENDOU, ENOX1, ENPP1, ENPP6, EPHA7, EPHB1, ERAP1, ERAP2, ERBB4, ERC2, ERO1LB, ERVFRD-1, ESR1, ESYT2, EXOC2, EXT1, EZR, F2RL2, F5, FABP2, FAS, FAT2, FAT3, FAT4, FCGR2C, FHIT, FLVCR1, FMN1, FMO2, FND1, FRA1, FREM2, FRMPD1, FSHR, FUT9, FZD6, GAA, GABBR1, GABBR2, GABRG2, GABRG3, GABRR1, GALNT10, GALNT13, GALNT2, GALNTL4, GALNTL6, GAS2, GFRAL, GNAL, GPC5, GPC6, GPHN, GPR111, GPR116, GPR139, GPR146, GPR158, GPR39, GPR65, GPR78, GRB10, GRIA1, GRID2, GRIK2, GRIK3, GRIK4, GRIN2A, GRIN3A, GRIP1, GRIP2, GRM5, GRM7, GRM8, GUCY1A, HAAO, HADH, HCRTR2, HHAT, HIP1, HK1, HLA-A, HLA-B, HLA-C, HLA-DOA, HLA-DPA1, HLA-DPB1, HLA-DQA1, HLA-DQA2, HLA-DQB1, HLA-DQB2, HLA-DRA, HLA-DRB1, HLA-DRB5, HLA-F, HLA-G, HMGCLL1, HPSE, HPSE2, HS3ST2, HS3ST4, HTR1E, IGSF5, INADL, INPP5D, INSR, ITGA1, ITGA11, ITGA2, ITGA9, ITGAE, ITGB5, ITPR1, ITPR2, IYD, KAZN, KCNA6, KCNAB1, KCNB2, KCNH7, KCNP4, KCNJ12, KCNJ15, KCNJ6, KCNK10, KCNK2, KCNMA1, KCNMB2, KCNMB3, KCNQ3, KCNQ5, KIAA0319, KIAA0528, KIF13A, KIF16B, KIRREL3, KITLG, KL, KLHL14, KLRB1, KNG1, KSR2, LAMA2, LAMP3, LEPR, LGR6, LHCGR, LOXL2, LPGAT1, LPP, LRFN2, LRR1, LRR4C, LRR52, LRRK2, LRRTM4, LSAMP, LYN, LYPP6B, MAG1, MAG2, MAN1A1, MAN2A1, MAPT, MARCH1, MARCH4, MBP, MCC, MDGA2, MGAT1, MGAT5, MGAT5B, MGS2, MPP5, MRAP2, MRGPRX4, MRS2, MRT04, MTCH1, MTHFS, MTUS1, MUC16, MYH9, MYO10, MYO16, MYO1B, MYO5B, MYO7A, MYOF, NAV3, NBEA, NCAM2, NCS1, NDST3, NDST4, NDUFA12, NDUFB1, NDUFB10, NDUFB4, NEDD4, NETO1, NFASC, NKAIN1, NKAIN3, NLGN1, NMNAT2, NMUR1, NMUR2, NOTCH4, NPHS2, NPOC4, NPSR1, NRCAM, NRG1, NRPI, NRXN1, NSL1, NTM, NTN4, NTRK1, NUP210, NUP35, OCA2, ODZ3, OMA1, OPCML, OPRK1, OR10AD1, OR10AG1, OR10C1, OR12D2, OR13C2, OR13C5, OR14A16, OR1L8, ORIN2, OR2AK2, OR2B11, OR2J2, OR2L13, OR2T4, OR2W3, OR4C3, OR4C45, OR51B2, OR51B6, OR51E1, OR51F1, OR51I2, OR51L1, OR51M1, OR51Q1, OR52D1, OR52E2, OR52E6, OR52J3, OR52N2, OR52N4, OR5AC2, OR5F1, OR5I1, OR5F2, OR5W2, OR8G1, OR8H2, OR8H3, OR8I2, OR8U8, OR9G1, OR9G9, OR9K2, OR9Q1, PAK2, PALM2, PAPP2A, PAQR8, PARD3, PARD3B, PCDH15, PCDH17, PCDH9, PCDHA12, PCDHA13, PCDHA9, PCLO, PDE4D, PDGFA, PDGFD, PDIA6, PEX5L, PGAP3, PGLYRP4, PGS1, PHLD2, PIGG, PIK3C2B, PIK3C2G, PINK1, PKD1L1, PKDREJ, PKP1, PKP2, PLA2G4C, PLA2G4D, PLA2G4E, PLA2G6, PLA2R1, PLAUR, PLCB1, PLCG2, PLCH1, PLD1, PLOD2, PLSCR1, PLXNA4, PNPLA3, POMT1, PPAP2A, PPP1R14C, PPP2CA, PPP3CA, PPRY1, PREX1, PRICKLE1, PRICKLE2, PRKCA, PRKCB, PRKCE, PRKG1, PROKR2, PROM1, PSD3, PSTPIP2, PTGER3, PTGS1, PTPN13, PTPRN2, PTPRT, PTPRU, PYGL, RAB12, RAB17, RAB27A, RAB31, RAB36, RAB3C, RAC2, RAMP3, RAPGEF4, RECK, RFTN1, RGS3, RGS6, RGS7, RIMBP2, RIMS2, RNF144B, RNPEP, ROBO1, RPSA, RRP12, RTKN2, RYR1, RYR2, RYR3, SBF2, SCARA3, SCARBI, SCD5, SCGN, SCN3B, SDF4, SDHA, SEC22A, SEC24D, SELE, SEMA3A, SEMA3E, SEMA5A, SEMA6D, SERINC5, SGCG, SGCZ, SGIP1, SH3GL2, SIPA1L1, SIRPA, SIRT3, SKAP2, SLC10A2, SLC12A6, SLC14A1, SLC14A2, SLC15A2, SLC16A14, SLC17A5, SLC19A3, SLC1A2, SLC1A6, SLC22A16, SLC22A5, SLC24A2, SLC24A4, SLC25A21, SLC25A25, SLC25A37, SLC26A9, SLC27A6, SLC28A1, SLC28A2, SLC28A3, SLC2A9, SLC35B3, SLC35D2, SLC41A3, SLC7A7, SLC8A1, SLC8A4, SLC9A8, SLC9A9, SLC9C1, SLC01B1, SLC01B3, SLC05A1, SLC06A1, SNCA, SNTG2, SNX19, SNX24, SNX25, SNX5, SNX7, SNX9, SOAT1, SOAT2, SORCS1, SORCS2, SORCS3, SPCS3, SPINK5, SPPL2C, SPRED1, SPRED3, SPTLC3, SQRLD, SSRI, ST3GAL6, ST8SIA6, STARD13, STT3A, STYK1, SVEP1, SVIL, SWAP70, SYBU, SYK, SYN3, SYNE1, SYNPR, SYT1, SYT6, SYT9, TACSTD2, TANC1, TAPI, TAP2, TAS1R2, TEC, TECTA, TEK, TES, TESC, THSD7A, TIAM1, TMEM106B, TMEM163, TOR1A, TPO, TRPC4, TRPC6, TSHR, TSPAN9, TTL10, TULP3, TYMS, UGT2B7, UNC13A, UNC13C, UNC5C, UNC93A, UST, VAV1, VAV2, VAV3, VNN1, VOPPI, VPS37C, WBSR17, WLS, WNK2, WWOX, XXYLT1, XYLT1, XYLT2, ZFYVE28, ZW10 |
| Cell junction                | $4.9 \times 10^{-11}$ | 2.0        | ABCB5, ABII, AFAP1, AJAPI, AMPH, AMTN, ANK2, ANK3, ANKS1B, APBB1IP, ARHGAP24, ARHGEF18, BSPRY, CADM2, CADPS, CADPS2, CCDC85C, CDC42BPA, CDHR2, CDSN, CHRM2, CHRN3, CLDN1, CLDN10, CLDN14, COL13A1, CTNNA2, CTNNA3, CTNND2, CXADR, DISC1, DLG1, DLG2, DLGAP1, DSCI, DSG1, DSG3, DTNA, EPHX2, ERC2, FAT2, FER, FMN1, FND1, FRMD4A, GABBR1, GABRB2, GABRG3, GABRR1, GPHN, GRIA1, GRID2, GRIK2, GRIK3, GRIN2A, GRIP1, IGSF5, INADL, IQSECI, ITGB5, KAZN, LAMA1, LPP, LRFN2, MAG1, MPP5, MYH9, NCS1, NETO1, NFASC, NFIA, NRXN1, PARD3B, PCLO, PHACTR1, PKP1, PKP2, PLEKHA7, POLR1E, PSD3, PTPRM, PTPRU, RIMBP2, RIMS2, SEPT11, SHISA9, SLC8A1, SNCA, SYN3, SYNPR, SYT9, TANC1, TEK, TES, TIAM1, TMEM163, TNS1, TRIM9, TRPC4, TRPC6, UNC13C                                                                                                                                                                                                                                                                                                                                                                                                                                                                                                                                                                                                                                                                                                                                                                                                                                                                                                                                                                                                                                                                                                                                                                                                                                                                                                                                                                                                                                                                                                                                                                                                                                                                                                                                                                                                                                                                                                                                                                                                                                                                                                                                                                                                                                                                                                                                                                                                                                                                                                                                                                                                                                                                                                                                                                                                                                                                                                                                                                                                                                                                                                                                                                                                                                                                                                                                                                                                                                                                                                                                                                                                                                                                                                                                                                                                                                                                                                                                                                                                                                                                                                                                                                                                                                                                                                                                                                                                                   |
| MHC class II protein complex | $2.8 \times 10^{-10}$ | 86.9       | HLA-DPA1, HLA-DPB1, HLA-DQA1, HLA-DQB1, HLA-DRA, HLA-DRB1                                                                                                                                                                                                                                                                                                                                                                                                                                                                                                                                                                                                                                                                                                                                                                                                                                                                                                                                                                                                                                                                                                                                                                                                                                                                                                                                                                                                                                                                                                                                                                                                                                                                                                                                                                                                                                                                                                                                                                                                                                                                                                                                                                                                                                                                                                                                                                                                                                                                                                                                                                                                                                                                                                                                                                                                                                                                                                                                                                                                                                                                                                                                                                                                                                                                                                                                                                                                                                                                                                                                                                                                                                                                                                                                                                                                                                                                                                                                                                                                                                                                                                                                                                                                                                                                                                                                                                                                                                                                                                                                                                                                                                                                                                                                                                                                                                                                                                                                                                                                                                                                                               |

GO categories in which false discovery rate is less than 0.01.

Table S26 continued.

| Description                                 | <i>p</i> -value      | Enrichment | Genes                                                                                                                                                                                                                                                                                                                                                                                                                                                                                                                                                                                                                                                                                                                                                                                                                                                                                                                                                                                                                                                                                                                                                                                                                                                                                                                                                                                                                                                                                                                           |
|---------------------------------------------|----------------------|------------|---------------------------------------------------------------------------------------------------------------------------------------------------------------------------------------------------------------------------------------------------------------------------------------------------------------------------------------------------------------------------------------------------------------------------------------------------------------------------------------------------------------------------------------------------------------------------------------------------------------------------------------------------------------------------------------------------------------------------------------------------------------------------------------------------------------------------------------------------------------------------------------------------------------------------------------------------------------------------------------------------------------------------------------------------------------------------------------------------------------------------------------------------------------------------------------------------------------------------------------------------------------------------------------------------------------------------------------------------------------------------------------------------------------------------------------------------------------------------------------------------------------------------------|
| Plasma membrane part                        | $1.7 \times 10^{-9}$ | 1.5        | ABCA1, ABCA4, ABCB5, ABCG8, ADAM29, ADCY3, AJAP1, ALK, ANK2, ANK3, ARHGEF4, ART3, ASIC2, ATP12A, ATP2B4, ATP6V0A4, BBS9, BMPR1B, C8A, CACNA1A, CACNA1C, CAMK2D, CASQ2, CASR, CATSPERB, CDH13, CDH4, CDHR2, CHRM2, CHRN3, CLCNKB, CLDN1, CLEC1A, CLEC1B, CNR2, CNTNAP2, CTNNA2, CUBN, CXADR, CXCL12, CYBRD1, CYP4F12, CYP4F2, DAB2, DCC, DDR1, DISP1, DLCL1, DSCAM, DSG1, DYSF, EMR1, ENPP1, EPHA6, EPHA7, EPHB1, ERBB4, EVC, EVC2, FAS, FCER2, FER, FGD5, FLT3, FLVCR1, GABBR1, GABBR2, GABRR1, GOLM1, GPC5, GPC6, GPR39, GRIA1, GRID2, GRIK2, GRIK3, GRIN2A, GRM5, GRM7, GRM8, HLA-A, HLA-B, HLA-C, HLA-DOA, HLA-DPA1, HLA-DPB1, HLA-DQA1, HLA-DQA2, HLA-DQB1, HLA-DQB2, HLA-DRA, HLA-DRB1, HLA-DRB5, HLA-G, IL12RB2, IL1RL2, INADL, ITGA1, ITGA2, ITGB5, ITGBL1, KANK1, KCNA6, KCNK2, KCNMB2, KCNMB3, KCNQ3, KCNQ5, KL, LGR5, LHCGR, LYN, MEGF10, MEGF11, MUC12, MYH9, MYO10, MYOF, NEDD4, NMUR1, NOTCH4, NOXO1, NRCAM, NRG1, NRG3, NRXN1, OPCML, OPRK1, PCDHA1, PCDHA10, PCDHA11, PCDHA2, PCDHA3, PCDHA4, PCDHA5, PCDHA6, PCDHA7, PCDHA8, PCDHAC1, PCSK9, PKHD1, PLA2R1, PLAUR, PLEK, PLSCR1, PPYR1, PRKAB2, PTPRB, PTPRD, PTPRF, PTPRM, PTPRU, RAB27A, RAMP3, RASAL1, RGS6, RGS7, RNPEP, ROBO2, SCARB1, SCN3B, SCNN1G, SELE, SGCZ, SHISA9, SLC10A2, SLC12A6, SLC14A1, SLC14A2, SLC15A2, SLC17A5, SLC1A2, SLC28A1, SLC2A9, SLC5A12, SLC7A7, SLC8A1, SLC9A4, SLC9C1, SLC01B1, SLC01B3, SNTG1, SNTG2, SNX5, SNX9, SPATA13, SPRED1, SPTB, STK39, SYK, TEK, TMEM17, TNFRSF11A, TPO, TRHDE, TRPA1, TRPC4, TSHR, TSPAN9, VWF, WWC1 |
| Integral to endoplasmic reticulum membrane  | $2.2 \times 10^{-9}$ | 31.8       | HLA-A, HLA-B, HLA-C, HLA-DPA1, HLA-DPB1, HLA-DQA1, HLA-DQB1, HLA-DRB1                                                                                                                                                                                                                                                                                                                                                                                                                                                                                                                                                                                                                                                                                                                                                                                                                                                                                                                                                                                                                                                                                                                                                                                                                                                                                                                                                                                                                                                           |
| Cytoplasmic vesicle membrane                | $6.3 \times 10^{-9}$ | 42.3       | CPE, DMBT1, HLA-A, HLA-C, HLA-DPA1, HLA-DPB1                                                                                                                                                                                                                                                                                                                                                                                                                                                                                                                                                                                                                                                                                                                                                                                                                                                                                                                                                                                                                                                                                                                                                                                                                                                                                                                                                                                                                                                                                    |
| Cell projection part                        | $6.5 \times 10^{-9}$ | 1.82       | ABI1, ALS2, AMPH, ANK3, ANKS1B, APBB2, APP, ARHGEF4, ATP6V0A4, ATP8B1, BBS9, CACNA1C, CHRM2, CNTNAP2, CTNND2, CUBN, CXADR, CYBRD1, DCC, DFNB31, DISC1, DLG2, DLGAP1, DNAAF1, DNAH1, DNAH2, DNAH4, DNAH5, DNAH8, DSCAM, DYNC2H1, EMR2, ERBB4, ERC2, ESR1, EVC, EVC2, EZR, FGD5, FOPNL, FSCB, FZD6, GABBR1, GRIA1, GRID2, GRIK2, GRIK3, GRIK4, GRIN2A, GRIN3A, GRM5, GRM7, HAP1, IFT57, KANK1, KCNQ3, KIF5C, KIRREL3, LRRK2, LYN, MAGI2, MAP2, MAPT, MYO10, MYO5A, MYO5B, NCS1, NETO1, NFASC, NLGN1, NRCAM, NRP1, NRXN1, PACRG, PKD1L1, PKHD1, PLCB4, PLEK, PROM1, PSD3, PTPRF, PTPRM2, RAPGEF4, ROBO1, ROBO2, RUFY3, SCARB1, SCN1A, SEPT11, SHISA9, SIPA1L1, SLC1A2, SLC8A1, SLC9C1, SNCA, SNTG1, SPAG16, SPATA13, SYNJ2, TANC1, TEK1, TEK4, TIAM2, TMEM17, TTL11, WWC1                                                                                                                                                                                                                                                                                                                                                                                                                                                                                                                                                                                                                                                                                                                                                          |
| Clathrin-coated endocytic vesicle membrane  | $8.0 \times 10^{-9}$ | 55.3       | HLA-DPA1, HLA-DPB1, HLA-DQA1, HLA-DQB1, HLA-DRA, HLA-DRB1                                                                                                                                                                                                                                                                                                                                                                                                                                                                                                                                                                                                                                                                                                                                                                                                                                                                                                                                                                                                                                                                                                                                                                                                                                                                                                                                                                                                                                                                       |
| Vesicle membrane                            | $8.8 \times 10^{-9}$ | 40.6       | CPE, DMBT1, HLA-A, HLA-C, HLA-DPA1, HLA-DPB1                                                                                                                                                                                                                                                                                                                                                                                                                                                                                                                                                                                                                                                                                                                                                                                                                                                                                                                                                                                                                                                                                                                                                                                                                                                                                                                                                                                                                                                                                    |
| Intrinsic to endoplasmic reticulum membrane | $9.4 \times 10^{-9}$ | 26.8       | HLA-A, HLA-B, HLA-C, HLA-DPA1, HLA-DPB1, HLA-DQA1, HLA-DQB1, HLA-DRB1                                                                                                                                                                                                                                                                                                                                                                                                                                                                                                                                                                                                                                                                                                                                                                                                                                                                                                                                                                                                                                                                                                                                                                                                                                                                                                                                                                                                                                                           |
| Cell projection                             | $9.8 \times 10^{-9}$ | 2.6        | ACPP, ADCY5, APBB1IP, APBB2, APOA1BP, ARHGAP24, ARPC5, BMPR1B, CACNA1A, CADM2, CATSPERB, CNGA3, CNTN4, CNTNAP2, CTNNA3, DYNC2H1, FAM65B, FGD5, FOPNL, FRMD4B, GRIA1, GRIP1, IFT57, IQGAP2, ITGA1, KALRN, KCNIP4, KIRREL3, KLHL1, KLHL14, KLHL24, LDHC, LRRC16A, MAPT, MYO10, MYO1B, MYO3A, MYO5B, MYRIP, NRCAM, PKHD1, PTPRM, RELN, RPTOR, SEMA3A, SEPT11, SLC9C1, SPATA13, SWAP70, SYNPR, WWOX                                                                                                                                                                                                                                                                                                                                                                                                                                                                                                                                                                                                                                                                                                                                                                                                                                                                                                                                                                                                                                                                                                                                 |
| Coated vesicle membrane                     | $1.5 \times 10^{-8}$ | 25.3       | HLA-A, HLA-B, HLA-C, HLA-DPA1, HLA-DPB1, HLA-DQA1, HLA-DQB1, HLA-DRB1                                                                                                                                                                                                                                                                                                                                                                                                                                                                                                                                                                                                                                                                                                                                                                                                                                                                                                                                                                                                                                                                                                                                                                                                                                                                                                                                                                                                                                                           |
| Trans-Golgi network membrane                | $3.3 \times 10^{-8}$ | 45.1       | HLA-DPA1, HLA-DPB1, HLA-DQA1, HLA-DQB1, HLA-DRA, HLA-DRB1                                                                                                                                                                                                                                                                                                                                                                                                                                                                                                                                                                                                                                                                                                                                                                                                                                                                                                                                                                                                                                                                                                                                                                                                                                                                                                                                                                                                                                                                       |
| Cytoplasmic vesicle part                    | $3.5 \times 10^{-8}$ | 32.6       | CPE, DMBT1, HLA-A, HLA-C, HLA-DPA1, HLA-DPB1                                                                                                                                                                                                                                                                                                                                                                                                                                                                                                                                                                                                                                                                                                                                                                                                                                                                                                                                                                                                                                                                                                                                                                                                                                                                                                                                                                                                                                                                                    |
| Phagocytic vesicle membrane                 | $2.6 \times 10^{-7}$ | 124.3      | DMBT1, HLA-A, HLA-B, HLA-C                                                                                                                                                                                                                                                                                                                                                                                                                                                                                                                                                                                                                                                                                                                                                                                                                                                                                                                                                                                                                                                                                                                                                                                                                                                                                                                                                                                                                                                                                                      |
| Integral to organelle membrane              | $2.7 \times 10^{-7}$ | 15.4       | HLA-A, HLA-B, HLA-C, HLA-DPA1, HLA-DPB1, HLA-DQA1, HLA-DQB1, HLA-DRB1                                                                                                                                                                                                                                                                                                                                                                                                                                                                                                                                                                                                                                                                                                                                                                                                                                                                                                                                                                                                                                                                                                                                                                                                                                                                                                                                                                                                                                                           |
| Intrinsic to organelle membrane             | $6.1 \times 10^{-7}$ | 13.7       | HLA-A, HLA-B, HLA-C, HLA-DPA1, HLA-DPB1, HLA-DQA1, HLA-DQB1, HLA-DRB1                                                                                                                                                                                                                                                                                                                                                                                                                                                                                                                                                                                                                                                                                                                                                                                                                                                                                                                                                                                                                                                                                                                                                                                                                                                                                                                                                                                                                                                           |
| Synapse                                     | $2.5 \times 10^{-6}$ | 2.3        | ABI1, APBB2, APP, CADM2, CADPS, CAMK2D, CHRM2, CPLX1, CXADR, DFNB31, EGFLAM, EPHA7, GRID2, GRIN3A, GRM7, INSR, MAGI2, MYH9, MYO7A, MYRIP, NETO1, NLGN1, NRCAM, NRG1, NRXN1, NTM, PCDH15, PCLO, PDZRN3, PHACTR1, PTPRF, RAPGEF4, RIMBP2, SEPT11, SERPINE2, SHISA9, SNCA                                                                                                                                                                                                                                                                                                                                                                                                                                                                                                                                                                                                                                                                                                                                                                                                                                                                                                                                                                                                                                                                                                                                                                                                                                                          |
| Synapse part                                | $6.1 \times 10^{-6}$ | 1.8        | ALS2, AMPH, ANK2, ANK3, ANKS1B, CACNA1C, CADPS2, CHRM2, CHRN3, CLSTN2, CNTN2, CTNND2, DDC, DISC1, DLG2, DLGAP1, DPYSL2, EPHA7, ERBB4, ERC2, ESR1, GABBR1, GABBR2, GABRB2, GABRG3, GABRR1, GPHN, GRIA1, GRID2, GRIK2, GRIK3, GRIK4, GRIN2A, GRIN3A, GRIP1, GRM5, GRM7, GRM8, LRFN2, LRRK2, LRRTM4, LYN, MAGI2, NCS1, NETO1, NLGN1, NRXN1, PCLO, PLCB4, PSD3, PTPRN2, RAB3C, RIMS2, SIPA1L1, SLC1A2, STON2, SYN3, SYNE1, SYNPR, SYT1, SYT6, SYT9, TANC1, TMEM163, TRIM9, UNC13A, UNC13C                                                                                                                                                                                                                                                                                                                                                                                                                                                                                                                                                                                                                                                                                                                                                                                                                                                                                                                                                                                                                                           |
| Synaptic membrane                           | $7.1 \times 10^{-6}$ | 2.4        | ANK2, ANK3, ANKS1B, CADPS2, CHRM2, CHRN3, CLSTN2, DISC1, DLG2, DLGAP1, EPHA7, ERC2, GABBR1, GABRB2, GABRG3, GABRR1, GPHN, GRIA1, GRID2, GRIK2, GRIK3, GRIN2A, GRIP1, GRM7, GRM8, LRFN2, NCS1, NETO1, NRXN1, PSD3, RIMS2, SLC1A2, SYNE1, TANC1, UNC13C                                                                                                                                                                                                                                                                                                                                                                                                                                                                                                                                                                                                                                                                                                                                                                                                                                                                                                                                                                                                                                                                                                                                                                                                                                                                           |
| MHC class I protein complex                 | $9.2 \times 10^{-6}$ | 135.2      | HLA-A, HLA-B, HLA-C                                                                                                                                                                                                                                                                                                                                                                                                                                                                                                                                                                                                                                                                                                                                                                                                                                                                                                                                                                                                                                                                                                                                                                                                                                                                                                                                                                                                                                                                                                             |
| Endosome membrane                           | $1.1 \times 10^{-5}$ | 9.6        | HLA-A, HLA-B, HLA-C, HLA-DPA1, HLA-DPB1, HLA-DQA1, HLA-DQB1, HLA-DRB1                                                                                                                                                                                                                                                                                                                                                                                                                                                                                                                                                                                                                                                                                                                                                                                                                                                                                                                                                                                                                                                                                                                                                                                                                                                                                                                                                                                                                                                           |

GO categories in which false discovery rate is less than 0.01.

Table S26 continued.

| Description                        | <i>p</i> -value      | Enrichment | Genes                                                                                                                                                                                                                                                                                                                                                                                                                                                                                                                                                                                                                                                             |
|------------------------------------|----------------------|------------|-------------------------------------------------------------------------------------------------------------------------------------------------------------------------------------------------------------------------------------------------------------------------------------------------------------------------------------------------------------------------------------------------------------------------------------------------------------------------------------------------------------------------------------------------------------------------------------------------------------------------------------------------------------------|
| Extracellular matrix part          | $1.3 \times 10^{-5}$ | 2.2        | ADAMTS1, AMTN, C1QTNF3, CCBE1, COL13A1, COL21A1, COL23A1, COL24A1, COL27A1, COL4A1, COL4A2, COL4A3, COL5A1, COL5A2, COL9A1, COLEC12, EGFLAM, EMID1, EMID2, FBN2, FREM2, LAMA1, LAMA2, LAMC1, LAMC2, LEPREL1, LOXL2, MATN2, MBL2, NID2, NTN1, NTN4, SCARA3, SNCA, THBS2, THSD4, TIMP2, TNR                                                                                                                                                                                                                                                                                                                                                                         |
| Endosomal part                     | $1.6 \times 10^{-5}$ | 9.1        | HLA-A, HLA-B, HLA-C, HLA-DPA1, HLA-DPB1, HLA-DQA1, HLA-DQB1, HLA-DRB1                                                                                                                                                                                                                                                                                                                                                                                                                                                                                                                                                                                             |
| Cell-cell junction                 | $1.6 \times 10^{-5}$ | 2.3        | 5), ABCB5, AMTN, ANK2, ANK3, CCDC85C, CDC42BPA, CDSN, CLDN1, CLDN10, CLDN14, COL13A1, CTNNA3, DSC1, DSG1, DSG3, FAT2, FNDC1, FRMD4A, IGSF5, INADL, KAZN, LAMA1, MAGI2, MPP5, MYH9, PKP1, PKP2, PLEKHA7, PTPRM, PTPRU, SLC8A1, TEK, TIAMI, TRPC4, TRPC6                                                                                                                                                                                                                                                                                                                                                                                                            |
| Intrinsic to plasma membrane       | $2.0 \times 10^{-5}$ | 1.9        | ABCA1, ABCA4, ABCB5, ADCY3, ALK, ANK2, ART3, BMPR1B, CDH4, CNR2, EMR1, FCER2, FLVCR1, GPC5, GPC6, GPR39, GRIK2, GRIN2A, HLA-A, HLA-B, HLA-C, HLA-DPA1, HLA-DQA1, HLA-DQA2, HLA-DRA, HLA-DRB1, IL1RL2, KCNMB2, KL, LHCGR, MUC12, NOTCH4, NRCAM, NRG3, NRXN1, OPCML, OPRK1, PCDHA1, PCDHA10, PCDHA11, PCDHA2, PCDHA3, PCDHA4, PCDHA5, PCDHA6, PCDHA7, PCDHA8, PCDHAC1, PKHD1, PLSCR1, PPYR1, PTPRB, PTPRD, PTPRM, RAMP3, SLC15A2, SLC2A9, SLCO1B1, SLCO1B3, SPTB, TEK, TSHR                                                                                                                                                                                         |
| Integral to plasma membrane        | $2.0 \times 10^{-5}$ | 1.7        | ABCA1, ABCA4, ABCB5, ADCY3, ALK, ANK2, ART3, ATP2B4, BMPR1B, CDH4, CHRM2, CLCNKB, CLDN1, CLEC1A, CNR2, DDR1, EMR1, EPHB1, FCER2, FLT3, FLVCR1, GABRR1, GPC5, GPC6, GPR39, GRID2, GRIK2, GRIN2A, GRM5, GRM8, HLA-A, HLA-B, HLA-C, HLA-DPA1, HLA-DQA1, HLA-DQA2, HLA-DRA, HLA-DRB1, IL1RL2, KCNMB2, KCNMB3, KL, LHCGR, MUC12, NOTCH4, NRCAM, NRG3, NRXN1, OPCML, OPRK1, PCDHA1, PCDHA10, PCDHA11, PCDHA2, PCDHA3, PCDHA4, PCDHA5, PCDHA6, PCDHA7, PCDHA8, PCDHAC1, PLA2R1, PLSCR1, PPYR1, PTPRB, PTPRD, PTPRM, PTPRU, RAMP3, SCARB1, SLC15A2, SLC17A5, SLC2A9, SLCO1B1, SLCO1B3, TEK, TPO, TRPA1, TSHR                                                              |
| Cytoskeleton                       | $3.1 \times 10^{-5}$ | 1.6        | ABI1, ABLIM1, ACTA2, ACTL8, ACTR2, ADH4, AFAP1, AKAP12, AMPH, ANK2, ANK3, APBB1IP, ARHGAP24, ARPC5, BICD1, CABP5, CAPI, CDSN, CORO2B, COTL1, CTNNA2, CTNNA3, CTNBP2NL, DAPK1, DDX20, DOCK2, ELMO1, ERC2, EZR, FAM65B, FER, FGD5, FHOD3, FMN1, FRMD4A, FRMD4B, FRMPD1, GPHN, GYS2, HAP1, INPP5D, IQGAP2, KALRN, KAZN, KITLG, KLHL1, KLHL3, KLHL5, LDB3, LRRFIP1, MAD1L1, MLPH, MTSS1, MYH9, MYO9B, MYOZ2, MYRIP, NME8, NUP35, PCLO, PDLIM1, PHLDB2, PLEKH2, PPP2CA, PRKCE, PSTPIP2, PTPN13, PTPN14, PTPN21, SELE, SGCG, SGCZ, SHROOM3, SLC30A9, SMARCA2, SNCA, SNTG1, SNTG2, SORBS2, SPRR1B, SPTB, STK39, SVIL, SYBU, SYNE1, TBCA, TEC, TNS1, TRIM9, TRPC4, UBXN11 |
| Clathrin-coated vesicle membrane   | $4.6 \times 10^{-5}$ | 14.3       | HLA-DPA1, HLA-DPB1, HLA-DQA1, HLA-DQB1, HLA-DRA, HLA-DRB1                                                                                                                                                                                                                                                                                                                                                                                                                                                                                                                                                                                                         |
| Neuron projection                  | $7.2 \times 10^{-5}$ | 1.7        | ALS2, ANKS1A, APP, BMPR1B, CACNA1A, CADM2, CDH13, CHL1, CHRM2, CNR2, CNTN4, CNTNAP2, CPLX1, CTNNA2, CXADR, DCC, DDC, DFNB31, DNER, DSCAM, EPHA7, EPHB1, GABBR1, GABBR2, GRIA1, GRID2, GRIK3, GRIK4, GRIN3A, GRIP1, GRM7, GRM8, HAP1, ITGA1, KALRN, KCNIP4, KCNJ6, KIF5C, KIRREL3, KLHL1, KLHL14, KLHL24, LRRK2, MAPT, MYO10, MYO5A, MYO5B, NCAM2, NCSI, NLGN1, NOV, NRCAM, NTM, ODZ4, PEX5L, PRKCA, PTPN13, RAB27A, RAPGEF4, RELN, RPTOR, SEMA3A, SEPT11, SIPA1L1, SLC1A2, SLC8A1, SNCA, SYNPR, SYT1, TRIM9                                                                                                                                                       |
| Extracellular matrix               | $7.3 \times 10^{-5}$ | 1.9        | ABI3BP, ADAMTS12, ADAMTS14, ADAMTS16, ADAMTS18, ADAMTS20, ADAMTSL1, ADAMTSL3, AMTN, CDON, CHL1, COL4A1, COL4A2, COL5A1, COL5A2, DMBT1, DPT, EFEMP1, EPYC, FBN2, FGF1, FRAS1, GPC5, GPC6, GPLD1, HPSE2, IGFBP7, LAMA1, LAMA2, LAMC1, LTBP1, MATN2, MEPE, MMP20, NAV2, NID2, NOV, PLSCR1, PXDN, RELN, SERPINE2, SPARCL1, SPOCK3, SPON1, TECTA, TNN, TNR, VIT, VWF                                                                                                                                                                                                                                                                                                   |
| Vacuolar membrane                  | $8.0 \times 10^{-5}$ | 8.5        | CUBN, HLA-DPA1, HLA-DPB1, HLA-DQA1, HLA-DQB1, HLA-DRA, HLA-DRB1                                                                                                                                                                                                                                                                                                                                                                                                                                                                                                                                                                                                   |
| Lysosomal membrane                 | $8.2 \times 10^{-5}$ | 10.1       | CUBN, HLA-DPA1, HLA-DPB1, HLA-DQA1, HLA-DQB1, HLA-DRA, HLA-DRB1                                                                                                                                                                                                                                                                                                                                                                                                                                                                                                                                                                                                   |
| Postsynaptic membrane              | $8.8 \times 10^{-5}$ | 2.1        | ANK2, ANK3, ANKS1B, CADPS2, CHRM2, CHRNB3, CLSTN2, DISC1, DLG2, DLGAP1, EPHA7, GABBR1, GABBR2, GABBR3, GABRR1, GPHN, GRIA1, GRID2, GRIK2, GRIK3, GRIK4, GRIN2A, GRIN3A, GRIP1, GRM7, LRFN2, LRRTM4, NCSI, NETO1, NLGN1, PSD3, SIPA1L1, SYNE1, TANC1                                                                                                                                                                                                                                                                                                                                                                                                               |
| Proteinaceous extracellular matrix | $1.3 \times 10^{-4}$ | 2.0        | ABI3BP, ADAMTS12, ADAMTS14, ADAMTS16, ADAMTS18, ADAMTS20, ADAMTSL1, ADAMTSL3, AMTN, CHL1, DMBT1, DPT, EFEMP1, EPYC, FBN2, FGF1, GPC5, GPC6, GPLD1, HPSE2, LAMA1, LTBP1, MATN2, MEPE, MMP20, NAV2, PXDN, RELN, SPARCL1, SPOCK3, SPON1, TECTA, TNN, TNR, VIT, VWF                                                                                                                                                                                                                                                                                                                                                                                                   |
| Sarcolemma                         | $1.6 \times 10^{-4}$ | 11.2       | ADCY5, ANK2, ANK3, LAMA2, SGCG, SGCZ                                                                                                                                                                                                                                                                                                                                                                                                                                                                                                                                                                                                                              |
| Vacuolar part                      | $2.1 \times 10^{-4}$ | 6.3        | CUBN, GPC5, HLA-DPA1, HLA-DPB1, HLA-DQA1, HLA-DQB1, HLA-DRA, HLA-DRB1                                                                                                                                                                                                                                                                                                                                                                                                                                                                                                                                                                                             |
| Golgi membrane                     | $3.2 \times 10^{-4}$ | 17.3       | HLA-A, HLA-C, HLA-DPA1, HLA-DPB1                                                                                                                                                                                                                                                                                                                                                                                                                                                                                                                                                                                                                                  |

GO categories in which false discovery rate is less than 0.01.
